# Supplementary material
Source: MDPI journal article supplement (https://www.mdpi.com/2071-1050/15/20/14994)
Supplement: s1 [file s1]

Archive with 4 entries (4 files):
- Figures and data.xlsx
- PRISMA_2020_checklist.pdf
- WoS_MDPI.csv
- _tsne.csv
