# Supplementary material
Source: MDPI journal article supplement (https://www.mdpi.com/2071-1050/15/20/14994)
Supplement: s1 [file s1 › _tsne.csv]

V1	V2
-0.073971560	-0.2000716217
1.312.306.723	-31.478.169.117
0.047981035	-23.538.477.688
-0.454304935	-44.309.358.194
0.245556470	-13.827.488.373
-0.454137484	-44.791.017.142
1.557.452.103	-40.870.481.851
-0.647922858	-28.842.753.144
0.312765592	-31.493.311.447
-1.093.103.758	-27.405.708.183
0.544882321	-21.205.610.867
-1.923.053.776	-19.396.189.900
0.107832136	-34.252.294.238
-0.076193106	-20.302.494.403
1.661.061.152	-39.379.085.352
1.447.784.389	-39.330.802.568
0.403077170	-27.604.828.301
-0.380925153	-24.746.817.118
-0.458961781	-22.360.200.395
0.503223903	-51.000.228.966
-1.888.851.847	-23.158.300.953
-2.046.482.251	-27.609.441.806
1.625.320.658	-23.791.151.061
0.746615810	-20.044.281.476
-2.249.185.198	-41.791.258.588
-2.027.581.213	-26.070.174.365
-2.575.017.799	-26.598.333.698
-2.188.714.823	-41.817.258.280
-3.077.457.315	0.1048181045
-0.272849755	-0.8463756052
3.608.124.072	-33.716.293.952
0.971073519	-24.709.163.495
-1.682.177.952	-14.445.996.402
3.613.023.616	27.534.251.992
-1.815.624.770	-0.6521598552
-4.496.897.013	0.6506599675
-3.237.401.431	-18.031.753.606
-2.957.009.856	-23.620.609.382
3.383.698.270	-16.832.346.859
3.457.737.589	-17.169.946.661
3.607.229.362	-33.565.038.453
-0.434594273	-10.767.820.100
2.026.316.717	-23.325.953.129
3.716.727.338	-34.135.736.707
-0.603973785	-0.7080966899
-1.878.042.665	-0.3822820452
0.852157760	-15.002.902.606
-2.099.240.006	-14.867.852.010
-1.197.462.805	-16.496.284.280
-4.956.161.725	0.6934805567
1.650.061.928	-14.480.518.219
-2.716.276.491	-0.7157764037
-2.594.832.885	-10.196.150.264
-4.917.191.985	0.6927515392
2.021.487.496	-23.711.022.970
-1.139.987.327	0.5481656109
1.682.023.743	17.931.561.634
2.830.550.525	-28.956.404.245
-0.833006756	14.972.994.543
1.702.077.808	43.607.015.271
0.801332872	-14.367.658.133
-1.421.578.663	10.513.644.405
0.718190437	0.9102893178
2.730.117.380	32.874.773.436
1.793.232.426	-13.673.062.512
0.357884493	-32.265.445.170
-0.783660122	-10.407.583.975
0.437567985	-10.435.862.380
1.714.912.939	44.624.356.354
4.670.351.118	14.058.939.227
2.717.463.455	-0.5240661742
4.533.476.868	13.986.891.793
-2.983.299.659	-10.094.827.640
3.464.029.185	-17.705.141.364
-3.330.099.322	0.2022302416
1.704.064.234	-0.8360994454
-0.902434666	-15.603.920.935
2.863.554.711	-13.305.700.922
3.771.760.556	-34.274.360.512
-1.361.837.685	-0.9542365437
-1.457.403.534	-0.4544476424
-0.787162538	0.2043292868
3.985.317.730	-0.2966353584
1.158.525.446	-0.3833083981
-1.180.639.941	0.1372904542
4.530.039.975	-0.6011350935
2.922.132.485	0.2396268574
0.859408917	-0.6768787705
1.817.233.928	-13.022.721.933
2.731.293.618	33.192.866.382
2.237.963.250	-0.8284460332
2.706.124.093	-0.9541645061
1.849.023.677	-18.919.161.014
-4.928.155.097	-19.804.944.423
-3.213.579.446	0.0292739924
-0.957490731	26.921.857.390
-0.122717982	0.6222996374
-0.582064118	0.2914774165
0.208492311	-0.1006617464
-1.517.281.471	0.0235730188
-0.242459115	-12.027.242.468
1.139.543.962	0.1965076667
-3.815.590.890	15.967.582.057
-0.081341564	0.1954140749
-0.206342896	-0.1728691997
0.171863505	27.691.004.739
-1.739.020.607	19.953.208.101
2.629.982.853	0.0007856461
1.172.770.836	0.2133539282
0.363502963	21.625.995.823
-0.404216668	-0.4165857188
0.449940099	0.0896257814
-1.930.657.735	-0.1314223201
-4.239.707.415	-0.6974317100
-2.930.993.683	27.997.691.552
-1.000.113.131	-13.924.694.188
2.577.299.826	0.6167817481
2.324.146.636	24.358.778.207
-1.007.712.969	-12.631.475.653
-0.331209952	-11.608.277.329
2.294.262.234	10.329.409.876
-1.635.149.403	22.142.233.124
1.570.536.160	-0.9131652605
-2.691.354.029	26.878.240.319
-0.826912900	0.0921857137
0.554144543	-0.9532210160
1.081.001.201	-18.581.144.118
-2.651.303.672	14.297.797.568
-1.137.085.888	0.9808406855
-0.175634406	11.125.930.860
0.373236953	0.1658456335
-2.577.565.345	28.490.024.722
0.901306597	0.8118846116
0.700041911	0.4455387231
2.671.263.882	0.6039757775
-2.725.838.369	-23.144.021.276
-2.107.131.128	34.413.429.345
1.929.333.008	-0.4709898076
2.643.896.948	16.428.871.355
-1.277.277.830	19.465.638.185
1.854.553.274	0.1147439176
2.808.495.360	17.349.853.823
-1.711.954.393	43.398.018.051
0.912489385	-0.6190622956
-1.076.665.400	18.778.736.991
1.308.581.719	16.859.551.777
-1.964.095.327	34.711.326.434
-0.631408173	19.276.107.456
0.858332423	-14.945.049.096
-1.817.728.054	-29.425.095.014
2.004.660.890	16.111.450.848
-4.394.858.682	-0.6846220165
2.925.718.001	19.413.089.231
-0.104064317	-13.490.407.048
-2.197.435.908	13.666.028.609
1.600.397.144	0.8224366220
-0.983087555	-20.251.397.667
-0.026695166	-0.9696528008
1.790.188.830	14.006.023.387
0.403540928	0.6921564039
2.159.525.086	-12.015.473.632
-1.515.401.529	-0.8809531449
3.479.658.680	11.924.492.325
0.906913715	14.828.381.453
0.269001496	21.459.465.091
0.279050210	0.3510556604
-0.312703267	-0.2314291193
1.760.537.028	0.5547882015
1.173.271.077	21.506.687.475
0.393914300	0.6854823966
0.452854505	14.226.471.294
-0.599014558	10.052.966.643
0.009469416	-0.3624225798
0.507969541	0.9398235019
-0.557834294	39.025.278.461
0.489994678	24.264.182.140
1.599.219.023	25.010.534.767
-0.525790788	37.093.521.591
-0.529325148	31.393.588.387
-1.522.460.119	-30.259.711.496
0.408897699	0.3440109806
0.112748123	30.678.895.227
-0.798810157	22.633.378.924
-2.552.976.523	10.631.595.472
1.153.480.023	18.451.320.687
-2.946.305.592	16.506.797.230
1.781.394.369	27.716.272.326
-0.969990197	-29.970.020.682
-3.833.557.447	-29.929.389.804
-2.541.051.188	-0.7740677853
-0.498471969	0.7363749749
1.749.434.552	15.226.448.366
0.036130594	14.207.095.566
0.180989914	-0.0754809106
1.545.591.919	-39.038.014.971
0.283343136	-0.3283292620
0.094909936	13.018.783.038
0.926996432	11.840.366.445
-0.892620262	19.499.074.071
-2.580.522.343	21.092.636.593
1.257.298.679	30.592.235.829
3.926.939.141	-0.0432340605
-1.080.133.520	0.4683425006
1.040.128.994	0.0351262693
-0.785015313	0.5573719046
0.400133856	0.4349425215
3.792.651.291	-34.456.760.248
-2.684.682.114	21.827.247.657
-0.403594739	-0.4177904945
3.082.237.668	0.2754163234
0.385565904	-0.2052522040
-0.470197078	-0.3156308623
0.733161152	31.137.043.936
0.928490334	-0.9272582097
-0.151722119	10.296.017.022
-1.524.558.234	-13.653.455.981
1.055.769.145	20.967.108.800
0.410701205	-0.6614256217
2.151.108.227	0.9892674467
3.734.805.271	28.269.027.070
0.749122592	14.409.947.490
1.644.881.557	0.6676311397
1.074.206.734	0.4875903259
-0.221206739	24.366.588.113
1.160.945.791	25.931.738.408
-0.487750406	-45.835.101.407
-1.689.350.390	35.779.584.687
1.046.879.688	24.173.424.204
-1.968.592.453	12.593.128.235
1.350.147.682	0.3404338907
4.620.491.775	14.344.256.257
-1.093.563.918	13.882.815.422
1.090.841.899	30.287.195.609
-0.477693894	35.504.123.639
1.310.647.994	-29.806.939.051
-0.094052531	32.078.402.902
0.592970075	-0.5266712389
-0.536107824	-23.368.039.003
-1.954.485.437	0.5634125570
4.614.301.963	-0.6317877874
1.837.154.544	-0.1150363113
-0.005692608	13.771.955.356
0.250928347	-15.515.402.425
-1.746.236.826	21.178.284.254
-2.448.568.088	0.4551787172
1.201.111.524	14.363.552.013
0.128421549	27.434.469.821
-0.922280825	14.041.452.031
0.269010857	-18.345.460.278
-0.858575495	0.9771627812
0.007828076	0.9068576585
-2.979.968.913	-0.6610907250
1.643.848.226	-39.535.332.299
3.297.587.800	10.669.952.330
-1.825.251.868	34.363.615.306
3.663.801.696	27.610.519.716
-0.997343106	26.175.934.532
-3.644.660.321	16.059.680.908
1.530.612.526	-0.4046567119
-1.633.891.708	-26.759.621.210
0.702235268	0.1801610693
-0.662483389	-0.0411475650
0.514307056	0.3050833066
0.310334179	-0.7074119465
1.042.356.430	-0.0227494563
1.674.155.168	0.7016042663
-2.312.028.209	-41.870.069.677
-0.215546664	-17.983.339.360
0.317507085	0.6225785552
4.277.115.794	14.849.854.626
-2.691.202.997	-0.9858108783
3.593.820.223	-33.705.958.764
-2.285.270.294	18.000.199.429
0.064880156	-30.995.653.638
3.454.482.919	-0.2636432043
0.059768939	0.7367561377
-1.540.408.495	11.971.058.894
0.112315532	0.5786825937
2.114.834.777	0.2074545275
-0.810266397	-0.9933795303
-1.962.053.230	26.311.577.195
-0.428873452	0.0668009924
-0.704482001	16.118.559.274
0.172964440	15.525.009.487
-1.214.019.897	-37.535.263.697
0.026270102	0.3287061656
1.022.521.892	-0.4574937474
-0.640684729	0.0575568336
-1.180.145.679	-36.757.588.063
-0.689343679	0.1473997972
1.069.027.165	28.831.854.497
0.929715570	14.891.310.716
-4.905.029.995	-19.753.166.178
-1.703.838.169	0.4604554109
-2.172.883.308	0.4197903426
-1.832.496.586	-14.402.291.023
-3.462.753.800	0.2376976242
0.110993871	44.994.489.217
-1.002.829.687	-0.5739640140
-2.834.701.884	-0.8525438456
-0.636088272	0.2713655103
-2.175.997.020	0.5000856323
-3.704.697.410	31.263.393.388
0.409944932	33.225.907.836
-0.870396346	14.436.012.965
-1.378.273.735	0.0576185128
-3.408.439.944	0.0434106030
1.578.864.624	-0.4674565203
-0.174763668	17.513.071.427
-0.627476161	-0.8486246372
3.161.188.823	-0.9631226312
-3.798.466.183	32.212.240.717
-0.800184890	15.102.945.217
0.243658868	-0.3322929606
-1.522.415.635	0.6215667958
-3.854.567.980	-30.039.078.210
-0.965169562	0.4353533532
2.041.950.697	-16.049.827.639
-2.160.362.653	0.4743478853
0.500423720	-50.904.721.899
0.160634254	-0.1104971744
-1.064.464.187	28.383.630.519
-0.311380944	-0.1578195066
-1.365.259.786	-0.2870215248
2.113.527.978	-25.405.480.034
1.841.314.654	32.791.013.544
1.246.326.446	0.4964234084
-0.337288550	41.072.927.062
1.331.773.467	-0.6887642806
-2.925.739.088	16.673.815.443
-0.060519322	-0.1207789989
