# Supplementary material
Source: MDPI journal article supplement (https://www.mdpi.com/2071-1050/15/20/14994)
Supplement: s1 [file s1 › Figures and data.xlsx]

## Sheet: CouplingMap
params	values
analysis	documents
field	TI
n	250
minfreq	1
label.term	ID
ngrams	1
impact.measure	local
stemming	FALSE
n.labels	3
size	0.3
community.repulsion	0
repel	FALSE
cluster	walktrap
documents	NormalizedLocalCitationScore	Cluster
BEN-AMAR W, 2017, J BUS ETHICS	9.71	1
PROVASI R, 2021, CORP SOC RESP ENV MA	5.7	1
GALBREATH J, 2011, J MANAGE ORGAN	4.71	1
ZAHID M, 2020, J CLEAN PROD	3.93	1
GLASS C, 2016, BUS STRATEG ENVIRON	3.11	1
GALLETTA S, 2022, CORP SOC RESP ENV MA	2.68	1
FURLOTTI K, 2019, CORP SOC RESP ENV MA	2.63	1
ZAID MAA, 2020, J CLEAN PROD	2.62	1
MEINZEN-DICK R, 2014, ANNU REV ENV RESOUR	2.5	1
KASSINIS G, 2016, CORP SOC RESP ENV MA	2.44	1
OLSSON D, 2017, J ENVIRON EDUC	1.02	1
ALODAT AY, 2023, CORP SOC RESP ENV MA	1	1
ALSULAMI A, 2023, SUSTAINABILITY-BASEL	1	1
BAZEL-SHOHAM O, 2023, J PROD INNOVAT MANAG	1	1
BLAKE-BEARD S, 2010, GEND MANAG	1	1
CUELLAR-GOMEZ OL, 2009, INT J INNOV SUSTAIN	1	1
CUNNISON S, 1994, J GENDER STUD	1	1
KHATRI I, 2023, CORP SOC RESP ENV MA	1	1
KHUNKAEW R, 2023, COGENT BUS MANAG	1	1
LESNIKOV P, 2023, RESOUR POLICY	1	1
LIN CJ, 2023, SUSTAINABILITY-BASEL	1	1
MORENO JA, 2023, CONTEXTOS EDUC	1	1
POTHISARN T, 2023, CORP SOC RESP ENV MA	1	1
SINGHANIA S, 2023, INT J SYST ASSUR ENG	1	1
TORRES-MANCERA R, 2023, REV LAT COMUN SOC	1	1
WOLFRAM M, 2023, ENVIRON INNOV SOC TR	1	1
IRAVANI MR, 2012, EUR J SUSTAIN DEV	0.9	1
ABDELWAHED NAA, 2022, SUSTAINABILITY-BASEL	0.89	1
ARAYAKARNKUL P, 2022, CORP SOC RESP ENV MA	0.89	1
AZIZ A, 2022, J ECONOM ADM SCI	0.89	1
BHATIA M, 2022, ENVIRON SOCIOL	0.89	1
KANADLI SB, 2022, CORP GOV-INT J BUS S	0.89	1
LEUENBERGER DZ, 2022, PUBLIC WORKS MANAG P	0.89	1
MUHAMMAD H, 2022, J MANAGE ORGAN	0.89	1
PRATI G, 2022, CURR RES ENVIRON SUS	0.89	1
GRAEF F, 2018, ENVIRON IMPACT ASSES	0.88	1
JERNECK A, 2018, SUSTAIN SCI	0.88	1
MAJIDAH M, 2018, AEBMR ADV ECON	0.88	1
MEEK WR, 2018, J DEV ENTREP	0.88	1
VOYLES TB, 2018, SUSTAINABILITY: APPROACHES TO ENVIRONMENTAL JUSTICE AND SOCIAL POWER	0.88	1
BANNO M, 2021, J MANAG GOV	0.81	1
BROTO O, 2021, SUSTAINABILITY-BASEL	0.81	1
CONTRERAS-MEDINA DI, 2021, SUSTAINABILITY-BASEL	0.81	1
IMBURGIA L, 2021, ENVIRON PLAN E-NAT	0.81	1
KHALIKOVA VR, 2021, J IND ECOL	0.81	1
MURPHY J, 2021, ENVIRON PLAN E-NAT	0.81	1
ODROWAZ-COATES A, 2021, SUSTAINABILITY-BASEL	0.81	1
SHRESTHA B, 2021, DISCOV SUSTAIN	0.81	1
BUCKINGHAM S, 2013, FAIR SHARED CITIES: THE IMPACT OF GENDER PLANNING IN EUROPE	0.71	1
NAJJAR D, 2013, INT J EDUC DEV	0.71	1
WEAVEN S, 2013, AUST EDUC RES	0.71	1
GENNARI F, 2019, SPR PROC BUS ECON	0.66	1
LESLIE IS, 2019, SOC NATUR RESOUR	0.66	1
ROKIS R, 2019, EUR J SUSTAIN DEV	0.66	1
BROWN LD, 2020, SUSTAINABILITY-BASEL	0.65	1
CENTENO EF, 2020, SUSTAINABILITY-BASEL	0.65	1
EL-IBIARY R, 2020, KOME	0.65	1
JOUBERT N, 2020, SUSTAINABILITY-BASEL	0.65	1
MUNGAI EM, 2020, AFR J MANAGE	0.65	1
OPATA CC, 2020, ASIAN WOMEN	0.65	1
PLA-JULIAN I, 2020, LOCAL ENVIRON	0.65	1
RIAL MAL, 2020, ENVIRON EDUC RES	0.65	1
SHRESTHA B, 2020, SUSTAIN DEV	0.65	1
ALSHAMI SA, 2017, ADV SCI LETT	0.51	1
CRUZ-TORRES ML, 2017, ROUT INT HANDB	0.51	1
ALARCON D, 2014, ROUTL FRONT POLIT EC	0.31	1
GLIGORIJEVIC V, 2016, MITT OSTERR GEOGR G	0.22	1
MARTINEZ MDV, 2019, CORP SOC RESP ENV MA	3.95	2
AGARWAL B, 2018, CURR OPIN ENV SUST	3.5	2
DE MASI S, 2021, BUS STRATEG ENVIRON	2.44	2
ORGANO V, 2013, GENDER PLACE CULT	2.14	2
OUTSIOS G, 2017, GEND MANAG	2.04	2
BRAVO F, 2019, BUS STRATEG ENVIRON	1.97	2
MARTINEZ MDV, 2020, CORP SOC RESP ENV MA	1.96	2
PAN CL, 2020, BUS STRATEG ENVIRON	1.96	2
LUCHS MG, 2012, J CONSUM POLICY	1.8	2
MARTINEZ MDV, 2022, EUR RES MANAG BUS EC	1.78	2
MWANGI E, 2011, ECOL SOC	1.29	2
ASIYANBOLA AR, 2003, SUS WORLD	1	2
BLAKE J, 2007, INT J INNOV SUSTAIN	1	2
BUCKINGHAM-HATFIELD S, 2002, GEOGRAPHY	1	2
GALMICHE-TEJEDA A, 2006, GEND TECHNOL DEV	1	2
HASSANEIN N, 1997, SOC NATUR RESOUR	1	2
ISSA A, 2023, CORP SOC RESP ENV MA	1	2
JACOBSON JL, 1996, HUMAN POPULATION AND THE ENVIRONMENTAL CRISIS	1	2
LYNCH NE, 2010, WOR SUSTAIN DEV OUTL	1	2
MARTI-BALLESTER CP, 2023, CORP SOC RESP ENV MA	1	2
MEKLACH Y, 2010, M A-REV ELECTRON MED	1	2
PROKOP V, 2023, BUS STRATEG ENVIRON	1	2
RATTEN V, 2023, THUNDERBIRD INT BUS	1	2
VINZ D, 2009, EUR J WOMENS STUD	1	2
ADEOTI AI, 2012, J SUSTAIN AGR	0.9	2
CARVAJAL M, 2022, BUS STRATEG ENVIRON	0.89	2
DANIEL-VASCONCELOS V, 2022, RAUSP MANAG J	0.89	2
FAN MY, 2022, ENVIRON SCI POLLUT R	0.89	2
FJELLBORG AA, 2022, INT RES GEOGR ENVIRO	0.89	2
GONZALEZ RD, 2022, SUSTAINABILITY-BASEL	0.89	2
JAVEED SA, 2022, J CLEAN PROD	0.89	2
LEAL W, 2022, ENVIRON DEV SUSTAIN	0.89	2
MA Z, 2022, SUSTAINABILITY-BASEL	0.89	2
WAHYUNINGRUM IFS, 2022, SUSTAINABILITY-BASEL	0.89	2
CALABRESE A, 2018, EUR J SUSTAIN DEV	0.88	2
DOS MUCHANGOS LS, 2018, DETRITUS	0.88	2
MURALIDHARAN S, 2018, J ADVERTISING RES	0.88	2
SIMON-KUMAR R, 2018, GENDER WORK ORGAN	0.88	2
YUMARNI T, 2018, BUILT ENVIRON PROJ A	0.88	2
BISTROM E, 2021, COMP EDUC REV	0.81	2
ELMHIRST R, 2021, ROU ST GENDER ENVIRO	0.81	2
FERRERAS-GARCIA R, 2021, SUSTAINABILITY-BASEL	0.81	2
GAVRILUT D, 2021, PROC EUR CONF ENTREP	0.81	2
JIRAKIATTIKUL S, 2021, SUSTAINABILITY-BASEL	0.81	2
JOHNSSON-LATHAM G, 2021, ROU ST GENDER ENVIRO	0.81	2
NCHANJI EB, 2021, SUSTAIN PROD CONSUMP	0.81	2
ODDSDOTTIR EE, 2021, SUSTAINABILITY-BASEL	0.81	2
PAILMAN W, 2021, 7TH INTERNATIONAL CONFERENCE ON HIGHER EDUCATION ADVANCES (HEAD'21)	0.81	2
PUCHETA-MARTINEZ MC, 2021, BUS STRATEG ENVIRON	0.81	2
SALEHI S, 2021, SUSTAINABILITY-BASEL	0.81	2
TRIANTAFYLLIDIS S, 2021, SUSTAIN SCI	0.81	2
ANGOS TN, 2013, CURRENT RES SER	0.71	2
DAMYANOVIC D, 2013, FAIR SHARED CITIES: THE IMPACT OF GENDER PLANNING IN EUROPE	0.71	2
SASTRE-MERINO S, 2013, CUAD DESARRO RURAL	0.71	2
DAVIES O, 2019, GENDER WORK ORGAN	0.66	2
NHEM S, 2019, FOR SCI TECHNOL	0.66	2
OSUNMUYIWA O, 2019, ENERGY RES SOC SCI	0.66	2
PIMPA N, 2019, COGENT BUS MANAG	0.66	2
SHINBROT XA, 2019, WORLD DEV	0.66	2
WANG ST, 2019, SUSTAINABILITY-BASEL	0.66	2
ARORA-JONSSON S, 2020, SUSTAINABLE DEVELOPMENT GOALS: THEIR IMPACTS ON FORESTS AND PEOPLE	0.65	2
CIFUENTES-FAURA J, 2020, SUSTAINABILITY-BASEL	0.65	2
KERRAS H, 2020, SUSTAINABILITY-BASEL	0.65	2
LI XL, 2020, SUSTAINABILITY-BASEL	0.65	2
MEENAKSHI N, 2020, INT J CONSUM STUD	0.65	2
RAHMAN O, 2020, SUSTAINABILITY-BASEL	0.65	2
WARNECKE T, 2015, J ECON ISSUES	0.64	2
ALBER G, 2017, ROU ST HAZ DIS RIS C	0.51	2
BABUGURA AA, 2017, ROUT INT HANDB	0.51	2
BAHTA YT, 2017, DEV PRACT	0.51	2
DEMOTTS RB, 2017, J POLIT ECOL	0.51	2
FOSTER EA, 2017, ROUT INT HANDB	0.51	2
KIM EM, 2017, GLOB SOC POLICY	0.51	2
MARSHALL M, 2017, PROG DEV STUD	0.51	2
THERIAULT V, 2017, WORLD DEV	0.51	2
WELLER I, 2017, ROUT INT HANDB	0.51	2
OPARAOCHA S, 2011, CURR OPIN ENV SUST	0.43	2
PUREVJAV B, 2011, ASIA-PAC ENV MONOGR	0.43	2
REED MG, 2011, GEND GLOB LOC WORLD	0.43	2
NARAYANAN Y, 2014, INT J HERIT STUD	0.31	2
PINTO DC, 2014, INT J CONSUM STUD	0.31	2
SMITH K, 2014, ETHICAL TRADE, GENDER, AND SUSTAINABLE LIVELIHOODS: WOMEN SMALLHOLDERS AND ETHICALITY IN KENYA	0.31	2
KONDYLIS F, 2016, WORLD DEV	0.22	2
SCANLAN SJ, 2016, DEVELOPMENT IN CRISIS: THREATS TO HUMAN WELL-BEING IN THE GLOBAL SOUTH AND GLOBAL NORTH	0.22	2
SMETSCHKA B, 2016, HUMAN ENVIRON INTERA	0.22	2
ZIMMERER KS, 2015, CURR OPIN ENV SUST	3.18	3
AGARWAL S, 2020, J CLEAN PROD	2.62	3
ATIF M, 2020, BUS STRATEG ENVIRON	2.62	3
RESURRECCION BP, 2013, WOMEN STUD INT FORUM	2.14	3
FISCHER G, 2021, INT J AGR SUSTAIN	1.63	3
MAHAJAN R, 2021, J ENTERP COMMUNITIES	1.63	3
ALMALKI DK, 2023, FASHION PRACT	1	3
APOSTU SA, 2023, J APPL RES HIGH EDUC	1	3
ARMITAGE DR, 1997, SINGAPORE J TROP GEO	1	3
BILAL AR, 2023, CORP SOC RESP ENV MA	1	3
BOOTH A, 1995, ENVIRON ETHICS	1	3
FORTI M, 1996, EUR J WOMENS STUD	1	3
KAMERI-MBOTE P, 2007, AGENDA-EMPOWER WOMEN	1	3
LEACH M, 1995, FEMINIST REV	1	3
LIEPINS R, 1995, AUST GEOGR	1	3
LITFIN KT, 1997, WOMEN POLIT	1	3
LOW BS, 1996, POPUL ENVIRON	1	3
MASEFIELD A, 1994, THEOR CULT SOC	1	3
MOMSEN JH, 1995, PROG HUM GEOG	1	3
OZDEMIR G, 2010, J ENVIRON PROT ECOL	1	3
PAL M, 2023, EQUAL DIVERS INCL	1	3
PALAKSHAPPA N, 2023, J BUS ETHICS	1	3
PANDEY S, 1998, INT SOC WORK	1	3
RUEST-ARCHAMBAULT E, 2006, WORLD SUSTAINABLE DEVELOPMENT OUTLOOK 2006: GLOBAL AND LOCAL RESOURCES IN ACHIEVING SUSTAINABLE DEVELOPMENT	1	3
RUSSELL Z, 2023, J ENVIRON POL PLAN	1	3
SADOWSKI RF, 2023, SUSTAINABILITY-BASEL	1	3
SCHEYVENS R, 1995, J RURAL STUD	1	3
SEAGER J, 1995, PROF GEOGR	1	3
SENER A, 2008, SUSTAIN DEV	1	3
SHEARER RR, 1997, SIGNS	1	3
SIAR SV, 1998, INT J SUST DEV WORLD	1	3
THOMASSLAYTER BP, 1997, SOC NATUR RESOUR	1	3
TOPFER K, 2010, KNOWLEDGE DEMOCRACY: CONSEQUENCES FOR SCIENCE, POLITICS, AND MEDIA	1	3
WILLIS K, 1995, THIRD WORLD PLAN REV	1	3
ZAHEDI S, 2009, WIT TRANS ECOL ENVIR	1	3
ZANG Y, 2007, TOWARDS A RESPONSIBLE SUCCESS: CORPORATE SOCIAL RESPONSIBILITY AND ENVIRONMENTAL MANAGEMENT	1	3
OLONG MA, 2012, J POLIT LAW	0.9	3
RAD S, 2012, SUSTAIN DEV	0.9	3
RUDAZ G, 2012, GENDER PLACE CULT	0.9	3
AL-QAHTANI M, 2022, SUSTAINABILITY-BASEL	0.89	3
BEGUM F, 2022, ENVIRON DEV	0.89	3
BIRSAN A, 2022, EUR J SUSTAIN DEV	0.89	3
DABARA DI, 2022, HABITAT INT	0.89	3
GALBREATH J, 2022, SUSTAIN DEV	0.89	3
KIMULI SNL, 2022, AFR J ECON MANAG STU	0.89	3
LAWSON L, 2022, ENVIRON SCI POLICY	0.89	3
TANDON I, 2022, CLIM DEV	0.89	3
TOVMASYAN G, 2022, MARK MANAG INNOV	0.89	3
ABATEMARCO T, 2018, GENDER PLACE CULT	0.88	3
ABU-RABIA-QUEDER S, 2018, J ARID ENVIRON	0.88	3
ALUKO YA, 2018, AFR J SCI TECHNOL IN	0.88	3
CHOWDHURY SA, 2018, WORLD SUSTAIN SER	0.88	3
OTENG-ABABIO M, 2018, LOCAL ENVIRON	0.88	3
SULUN EE, 2018, RESOURCES-BASEL	0.88	3
YOUNG A, 2018, GENDER WORK ORGAN	0.88	3
YULIDA R, 2018, IOP C SER EARTH ENV	0.88	3
AKURUGU CA, 2021, WORLD DEV PERSPECT	0.81	3
CARFORA V, 2021, SUSTAINABILITY-BASEL	0.81	3
CONNOR M, 2021, DEV PRACT	0.81	3
GRABOWSKI PP, 2021, INT J AGR SUSTAIN	0.81	3
HAGGAR J, 2021, INT J AGR SUSTAIN	0.81	3
LOVELL RJ, 2021, ENVIRON DEV SUSTAIN	0.81	3
MAHADEVIA D, 2021, ENVIRON URBAN ASIA	0.81	3
RIVERA MEC, 2021, ACAD-REV LATINOAM AD	0.81	3
RUDA M, 2021, SUSTAINABILITY-BASEL	0.81	3
STEFAN D, 2021, SUSTAINABILITY-BASEL	0.81	3
YASMIN T, 2013, AGROECOL SUST FOOD	0.71	3
ALARCON JMS, 2019, WORLD DEV	0.66	3
ALBLOUSHY H, 2019, INT J CONSUM STUD	0.66	3
BEITELSPACHER L, 2019, GO-TO-MARKET STRATEGIES FOR WOMEN ENTREPRENEURS: CREATING AND EXPLORING SUCCESS	0.66	3
KIM G, 2019, J FASH MARK MANAG	0.66	3
KRASAVAC BC, 2019, EKON POLJOPR	0.66	3
PAPAVASILEIOU V, 2019, 5TH INTERNATIONAL CONFERENCE ON ADVANCES IN EDUCATION AND SOCIAL SCIENCE (ADVED 2019)	0.66	3
PILGERAM R, 2019, SOC NATUR RESOUR	0.66	3
POWELL M, 2019, J EXT	0.66	3
SEGOVIA-PEREZ M, 2019, SUSTAINABILITY-BASEL	0.66	3
AKHTER J, 2020, SUSTAINABILITY-BASEL	0.65	3
ATMACA AC, 2020, PROBL EDUC 21ST CENT	0.65	3
CHIBLOW S, 2020, WATER-SUI	0.65	3
GALBREATH J, 2020, AUSTRALAS J ENV MAN	0.65	3
GRAAFLAND J, 2020, CORP SOC RESP ENV MA	0.65	3
KACIAK E, 2020, J BUS RES	0.65	3
MALETA Y, 2020, INTERDISCIP RES GEND	0.65	3
MEDUPIN C, 2020, SUSTAINABILITY-BASEL	0.65	3
GHANBARI Y, 2015, SCI PAP-SER-E-LAND R	0.64	3
PALLARES-BLANCH M, 2015, CARPATH J EARTH ENV	0.64	3
SANDOLE DJD, 2015, CONFL RESOLUT Q	0.64	3
TANSKI M, 2015, PROBL EKOROZW	0.64	3
ATEHORTUA JV, 2017, GEND DEV SOC CHANG	0.51	3
JARVIS H, 2017, ROUT INT HANDB	0.51	3
MELLO D, 2017, WOMEN STUD INT FORUM	0.51	3
OYANEDEL-CRAVER V, 2017, J WATER RES PLAN MAN	0.51	3
RAFIQUE S, 2017, WORLD SUSTAIN SER	0.51	3
GIBSON K, 2011, ASIA-PAC ENV MONOGR	0.43	3
LAHIRI-DUTT K, 2011, ASIA-PAC ENV MONOGR	0.43	3
NA, 2011, ASIA-PAC ENV MONOGR	0.43	3
CHAWAWA M, 2014, UNIV LIFE LEARN SER	0.31	3
SIULEMBA GK, 2014, AGENDA-EMPOWER WOMEN	0.31	3
label	group	freq	centrality	impact	color
women - conf 49% governance - conf 55.6% impact - conf 48.4%	1	67	0.31628	2.15614	#E41A1C80
women - conf 42.9% impact - conf 35.5% governance - conf 37%	2	85	0.482783	1.57707	#377EB880
gender - conf 87% business - conf 75% performance - conf 40%	3	98	0.385435	1.21723	#4DAF4A80

## Sheet: MainInfo
Description	Results
MAIN INFORMATION ABOUT DATA
Timespan	1993:2023
Sources (Journals, Books, etc)	184
Documents	308
Annual Growth Rate %	8.64
Document Average Age	6.87
Average citations per doc	14.13
References	15722
DOCUMENT CONTENTS
Keywords Plus (ID)	602
Author's Keywords (DE)	849
AUTHORS
Authors	755
Authors of single-authored docs	102
AUTHORS COLLABORATION
Single-authored docs	105
Co-Authors per Doc	2.53
International co-authorships %	25.65
DOCUMENT TYPES
article	209
article; book chapter	25
article; early access	13
article; proceedings paper	2
book	3
book review	12
editorial material	12
editorial material; book chapter	4
proceedings paper	21
review	4
review; book chapter	1
review; early access	2

## Sheet: AnnualSciProd
Year	Articles
1993	2
1994	2
1995	7
1996	4
1997	6
1998	3
1999	1
2000	0
2001	0
2002	2
2003	1
2004	0
2005	0
2006	2
2007	4
2008	2
2009	3
2010	7
2011	12
2012	9
2013	10
2014	10
2015	7
2016	8
2017	23
2018	21
2019	25
2020	36
2021	44
2022	33
2023	24

## Sheet: AnnualCitPerYear
Year	MeanTCperArt	N	MeanTCperYear	CitableYears
1993	4	2	0.13	31
1994	0	2	0	30
1995	2.43	7	0.08	29
1996	3	4	0.11	28
1997	4.5	6	0.17	27
1998	96.67	3	3.72	26
1999	0	1	0	25
2002	5.5	2	0.25	22
2003	0	1	0	21
2006	1	2	0.06	18
2007	2	4	0.12	17
2008	24.5	2	1.53	16
2009	7.33	3	0.49	15
2010	3.57	7	0.26	14
2011	32.25	12	2.48	13
2012	22.67	9	1.89	12
2013	18.2	10	1.65	11
2014	35.4	10	3.54	10
2015	17.57	7	1.95	9
2016	61.62	8	7.7	8
2017	24.61	23	3.52	7
2018	9.86	21	1.64	6
2019	18.6	25	3.72	5
2020	15.17	36	3.79	4
2021	5.2	44	1.73	3
2022	3.36	33	1.68	2
2023	0.58	24	0.58	1

## Sheet: MostRelSources
Sources	Articles
SUSTAINABILITY	36
CORPORATE SOCIAL RESPONSIBILITY AND ENVIRONMENTAL MANAGEMENT	17
BUSINESS STRATEGY AND THE ENVIRONMENT	8
GENDER WORK AND ORGANIZATION	6
GENDERING THE FIELD: TOWARDS SUSTAINABLE LIVELIHOODS FOR MINING COMMUNITIES	5
ROUTLEDGE HANDBOOK OF GENDER AND ENVIRONMENT	5
CRITICAL STUDIES IN MENS FASHION	4
EUROPEAN JOURNAL OF SUSTAINABLE DEVELOPMENT	4
INTERNATIONAL JOURNAL OF CONSUMER STUDIES	4
JOURNAL OF CLEANER PRODUCTION	4
SOCIETY & NATURAL RESOURCES	4
SUSTAINABLE DEVELOPMENT	4
WORLD DEVELOPMENT	4
AGENDA-EMPOWERING WOMEN FOR GENDER EQUITY	3
CURRENT OPINION IN ENVIRONMENTAL SUSTAINABILITY	3
GENDER PLACE AND CULTURE	3
INTERNATIONAL JOURNAL OF AGRICULTURAL SUSTAINABILITY	3
LOCAL ENVIRONMENT	3
SUSTAINABILITY SCIENCE	3
WOMEN, URBANIZATION AND SUSTAINABILITY: PRACTICES OF SURVIVAL, ADAPTATION AND RESISTANCE	3
COGENT BUSINESS & MANAGEMENT	2
DEVELOPMENT IN PRACTICE	2
ENVIRONMENT AND PLANNING E-NATURE AND SPACE	2
ENVIRONMENT DEVELOPMENT AND SUSTAINABILITY	2
ENVIRONMENTAL EDUCATION RESEARCH	2
ENVIRONMENTAL SCIENCE AND POLLUTION RESEARCH	2
EUROPEAN JOURNAL OF WOMENS STUDIES	2
FAIR SHARED CITIES: THE IMPACT OF GENDER PLANNING IN EUROPE	2
GENDER IN MANAGEMENT	2
INTERNATIONAL JOURNAL OF INNOVATION AND SUSTAINABLE DEVELOPMENT	2
JOURNAL OF BUSINESS ETHICS	2
JOURNAL OF MANAGEMENT & ORGANIZATION	2
JOURNAL OF POLITICAL ECOLOGY	2
NATURAL RESOURCES FORUM	2
PROBLEMY EKOROZWOJU	2
SINGAPORE JOURNAL OF TROPICAL GEOGRAPHY	2
WATER	2
WOMENS STUDIES INTERNATIONAL FORUM	2
2011 ASEE ANNUAL CONFERENCE & EXPOSITION	1
5TH INTERNATIONAL CONFERENCE ON ADVANCES IN EDUCATION AND SOCIAL SCIENCE (ADVED 2019)	1
7TH INTERNATIONAL CONFERENCE ON HIGHER EDUCATION ADVANCES (HEAD'21)	1
ACADEMIA-REVISTA LATINOAMERICANA DE ADMINISTRACION	1
ADVANCED SCIENCE LETTERS	1
ADVANCES IN GENDER AND CULTURAL RESEARCH IN BUSINESS AND ECONOMICS	1
AFRICA JOURNAL OF MANAGEMENT	1
AFRICAN JOURNAL OF ECONOMIC AND MANAGEMENT STUDIES	1
AFRICAN JOURNAL OF SCIENCE TECHNOLOGY INNOVATION & DEVELOPMENT	1
AGROECOLOGY AND SUSTAINABLE FOOD SYSTEMS	1
ALTERNATIVES-PERSPECTIVES ON SOCIETY TECHNOLOGY AND ENVIRONMENT	1
ANNUAL REVIEW OF ENVIRONMENT AND RESOURCES, VOL 39	1
ASIAN WOMEN	1
AUSTRALASIAN JOURNAL OF ENVIRONMENTAL MANAGEMENT	1
AUSTRALIAN EDUCATIONAL RESEARCHER	1
AUSTRALIAN GEOGRAPHER	1
BUILT ENVIRONMENT PROJECT AND ASSET MANAGEMENT	1
BUSINESS STRATEGY AND DEVELOPMENT	1
CARPATHIAN JOURNAL OF EARTH AND ENVIRONMENTAL SCIENCES	1
CLIMATE AND DEVELOPMENT	1
COLLECTED PAPERS OF THE 4TH SERD SEMINAR ON GENDER AND TECHNOLOGY	1
COMPARATIVE EDUCATION REVIEW	1
CONFLICT RESOLUTION QUARTERLY	1
CONTEXTOS EDUCATIVOS-REVISTA DE EDUCACION	1
CORPORATE GOVERNANCE-THE INTERNATIONAL JOURNAL OF BUSINESS IN SOCIETY	1
CUADERNOS DE DESARROLLO RURAL	1
CURRENT RESEARCH IN ENVIRONMENTAL SUSTAINABILITY	1
DEMOGRAPHIC CHANGE IN AUSTRALIA'S RURAL LANDSCAPES: IMPLICATIONS FOR SOCIETY AND THE ENVIRONMENT	1
DETRITUS	1
DEVELOPMENT IN CRISIS: THREATS TO HUMAN WELL-BEING IN THE GLOBAL SOUTH AND GLOBAL NORTH	1
DISCOVER SUSTAINABILITY	1
ECOLOGICAL MODELLING	1
ECOLOGY AND SOCIETY	1
EKONOMIKA POLJOPRIVREDA-ECONOMICS OF AGRICULTURE	1
EMPLOYEE RELATIONS	1
ENERGY RESEARCH & SOCIAL SCIENCE	1
ENVIRONMENT AND URBANIZATION ASIA	1
ENVIRONMENT-BEHAVIOUR PROCEEDINGS JOURNAL	1
ENVIRONMENTAL DEVELOPMENT	1
ENVIRONMENTAL ETHICS	1
ENVIRONMENTAL IMPACT ASSESSMENT REVIEW	1
ENVIRONMENTAL INNOVATION AND SOCIETAL TRANSITIONS	1
ENVIRONMENTAL SCIENCE & POLICY	1
ENVIRONMENTAL SOCIOLOGY	1
EQUALITY DIVERSITY AND INCLUSION	1
ETHICAL TRADE, GENDER, AND SUSTAINABLE LIVELIHOODS: WOMEN SMALLHOLDERS AND ETHICALITY IN KENYA	1
EUROPEAN RESEARCH ON MANAGEMENT AND BUSINESS ECONOMICS	1
FASHION PRACTICE-THE JOURNAL OF DESIGN CREATIVE PROCESS & THE FASHION INDUSTRY	1
FEMINISM, REPUBLICANISM, EGALITARIANISM, ENVIRONMENTALISM: BILL OF RIGHTS AND GENDERED SUSTAINABLE INITIATIVES	1
FEMINIST REVIEW	1
FOREST SCIENCE AND TECHNOLOGY	1
GENDER PERSPECTIVES AND GENDER IMPACTS OF THE GLOBAL ECONOMIC CRISIS	1
GENDER TECHNOLOGY & DEVELOPMENT	1
GENDER, INTERSECTIONALITY AND CLIMATE INSTITUTIONS IN INDUSTRIALISED STATES	1
GEOGRAPHY	1
GLOBAL SOCIAL POLICY	1
GO-TO-MARKET STRATEGIES FOR WOMEN ENTREPRENEURS: CREATING AND EXPLORING SUCCESS	1
HABITAT INTERNATIONAL	1
HANDBOOK OF LIFELONG LEARNING FOR SUSTAINABLE DEVELOPMENT	1
HANDBOOK OF THEORY AND PRACTICE OF SUSTAINABLE DEVELOPMENT IN HIGHER EDUCATION, VOL 4	1
HUMAN POPULATION AND THE ENVIRONMENTAL CRISIS	1
INTERNATIONAL BUSINESS REVIEW	1
INTERNATIONAL JOURNAL OF EDUCATIONAL DEVELOPMENT	1
INTERNATIONAL JOURNAL OF HERITAGE STUDIES	1
INTERNATIONAL JOURNAL OF SUSTAINABLE DEVELOPMENT AND WORLD ECOLOGY	1
INTERNATIONAL JOURNAL OF SYSTEM ASSURANCE ENGINEERING AND MANAGEMENT	1
INTERNATIONAL RESEARCH IN GEOGRAPHICAL AND ENVIRONMENTAL EDUCATION	1
INTERNATIONAL REVIEW OF EDUCATION	1
INTERNATIONAL SOCIAL WORK	1
INTERNATIONAL SYMPOSIUM ON ARBORICULTURE IN THE TROPICS: SECURING ECOSYSTEM FUNCTIONS IN URBAN LANDSCAPE (ISATROP 2017)	1
IWC 2007: EDUCATION, EMPLOYMENT AND EVERYTHING - THE TRIPLE LAYERS OF WOMAN'S LIFE, CONFERENCE PAPERS	1
JOURNAL OF ADVERTISING RESEARCH	1
JOURNAL OF APPLIED RESEARCH IN HIGHER EDUCATION	1
JOURNAL OF ARID ENVIRONMENTS	1
JOURNAL OF BUSINESS RESEARCH	1
JOURNAL OF CIVIL ENGINEERING EDUCATION	1
JOURNAL OF CONSUMER POLICY	1
JOURNAL OF DEVELOPMENTAL ENTREPRENEURSHIP	1
JOURNAL OF ECONOMIC AND ADMINISTRATIVE SCIENCES	1
JOURNAL OF ECONOMIC ISSUES	1
JOURNAL OF ENGINEERING EDUCATION	1
JOURNAL OF ENTERPRISING COMMUNITIES-PEOPLE AND PLACES IN THE GLOBAL ECONOMY	1
JOURNAL OF ENVIRONMENTAL EDUCATION	1
JOURNAL OF ENVIRONMENTAL PLANNING AND MANAGEMENT	1
JOURNAL OF ENVIRONMENTAL POLICY & PLANNING	1
JOURNAL OF ENVIRONMENTAL PROTECTION AND ECOLOGY	1
JOURNAL OF EXTENSION	1
JOURNAL OF FASHION MARKETING AND MANAGEMENT	1
JOURNAL OF GENDER STUDIES	1
JOURNAL OF GLOBAL FASHION MARKETING	1
JOURNAL OF INDUSTRIAL ECOLOGY	1
JOURNAL OF INTERNATIONAL DEVELOPMENT	1
JOURNAL OF MANAGEMENT & GOVERNANCE	1
JOURNAL OF MANAGEMENT EDUCATION	1
JOURNAL OF MANAGEMENT IN ENGINEERING	1
JOURNAL OF POLITICS AND LAW	1
JOURNAL OF PRODUCT INNOVATION MANAGEMENT	1
JOURNAL OF RETAILING AND CONSUMER SERVICES	1
JOURNAL OF RURAL STUDIES	1
JOURNAL OF SOUTH ASIAN DEVELOPMENT	1
JOURNAL OF SUSTAINABLE AGRICULTURE	1
JOURNAL OF WATER RESOURCES PLANNING AND MANAGEMENT	1
JUST ECOLOGICAL INTEGRITY: THE ETHICS OF MAINTAINING PLANETARY LIFE	1
KNOWLEDGE DEMOCRACY: CONSEQUENCES FOR SCIENCE, POLITICS, AND MEDIA	1
KOME-AN INTERNATIONAL JOURNAL OF PURE COMMUNICATION INQUIRY	1
M+A-REVISTA ELECTRONICA DE MEDIO AMBIENTE	1
MANAGERIAL AND DECISION ECONOMICS	1
MARKETING AND MANAGEMENT OF INNOVATIONS	1
MITTEILUNGEN DER OSTERREICHISCHEN GEOGRAPHISCHEN GESELLSCHAFT	1
NEGOTIATING GENDER EXPERTISE IN ENVIRONMENT AND DEVELOPMENT: VOICES FROM FEMINIST POLITICAL ECOLOGY	1
PEOPLE AND RANGELANDS BUILDING THE FUTURE, VOLS 1 AND 2	1
POPULATION AND ENVIRONMENT	1
PROBLEMS OF EDUCATION IN THE 21ST CENTURY	1
PROCEEDINGS OF THE 16TH EUROPEAN CONFERENCE ON INNOVATION AND ENTREPRENEURSHIP (ECIE 2021), VOL 1	1
PROCEEDINGS OF THE 1ST INTERNATIONAL CONFERENCE ON ECONOMICS, BUSINESS, ENTREPRENEURSHIP, AND FINANCE (ICEBEF 2018)	1
PROFESSIONAL GEOGRAPHER	1
PROGRESS IN DEVELOPMENT STUDIES	1
PROGRESS IN HUMAN GEOGRAPHY	1
PUBLIC WORKS MANAGEMENT & POLICY	1
RAUSP MANAGEMENT JOURNAL	1
RESHAPING GENDER AND CLASS IN RURAL SPACES	1
RESOURCES POLICY	1
RESOURCES-BASEL	1
REVISTA LATINA DE COMUNICACION SOCIAL	1
RUPKATHA JOURNAL ON INTERDISCIPLINARY STUDIES IN HUMANITIES	1
SCIENTIFIC PAPERS-SERIES E-LAND RECLAMATION EARTH OBSERVATION & SURVEYING ENVIRONMENTAL ENGINEERING	1
SCOTTISH GEOGRAPHICAL JOURNAL	1
SEEDING SUCCESS IN INDIGENOUS AUSTRALIAN HIGHER EDUCATION	1
SIGNS	1
SOCIAL ECOLOGY: SOCIETY-NATURE RELATIONS ACROSS TIME AND SPACE	1
SUSTAINABILITY: APPROACHES TO ENVIRONMENTAL JUSTICE AND SOCIAL POWER	1
SUSTAINABLE CITY V: URBAN REGENERATION AND SUSTAINABILITY	1
SUSTAINABLE DEVELOPMENT GOALS: THEIR IMPACTS ON FORESTS AND PEOPLE	1
SUSTAINABLE DEVELOPMENT, ECOLOGICAL COMPLEXITY, AND ENVIRONMENTAL VALUES	1
SUSTAINABLE PLANNING AND DEVELOPMENT	1
SUSTAINABLE PRODUCTION AND CONSUMPTION	1
THEORY CULTURE & SOCIETY	1
THIRD WORLD PLANNING REVIEW	1
THUNDERBIRD INTERNATIONAL BUSINESS REVIEW	1
TOWARDS A RESPONSIBLE SUCCESS: CORPORATE SOCIAL RESPONSIBILITY AND ENVIRONMENTAL MANAGEMENT	1
TOWARDS EPISTEMIC SOVEREIGNTY: (RE)-THINKING DEVELOPMENT IN A CHANGING GLOBAL POLITICAL ECONOMY	1
UNDERSTANDING CLIMATE CHANGE THROUGH GENDER RELATIONS	1
UNIVERSITY ENGAGEMENT AND ENVIRONMENTAL SUSTAINABILITY	1
WOMEN & POLITICS	1
WORLD DEVELOPMENT PERSPECTIVES	1
WORLD SUSTAINABLE DEVELOPMENT OUTLOOK 2006: GLOBAL AND LOCAL RESOURCES IN ACHIEVING SUSTAINABLE DEVELOPMENT	1

## Sheet: SourceProdOverTime
Year	SUSTAINABILITY	CORPORATE SOCIAL RESPONSIBILITY AND ENVIRONMENTAL MANAGEMENT	BUSINESS STRATEGY AND THE ENVIRONMENT	GENDER WORK AND ORGANIZATION	GENDERING THE FIELD: TOWARDS SUSTAINABLE LIVELIHOODS FOR MINING COMMUNITIES	ROUTLEDGE HANDBOOK OF GENDER AND ENVIRONMENT
1993	0	0	0	0	0	0
1994	0	0	0	0	0	0
1995	0	0	0	0	0	0
1996	0	0	0	0	0	0
1997	0	0	0	0	0	0
1998	0	0	0	0	0	0
1999	0	0	0	0	0	0
2000	0	0	0	0	0	0
2001	0	0	0	0	0	0
2002	0	0	0	0	0	0
2003	0	0	0	0	0	0
2004	0	0	0	0	0	0
2005	0	0	0	0	0	0
2006	0	0	0	0	0	0
2007	0	0	0	0	0	0
2008	0	0	0	0	0	0
2009	0	0	0	0	0	0
2010	0	0	0	0	0	0
2011	0	0	0	1	5	0
2012	0	0	0	1	5	0
2013	0	0	0	1	5	0
2014	1	1	0	1	5	0
2015	1	1	0	1	5	0
2016	2	3	1	1	5	0
2017	3	3	1	1	5	5
2018	3	3	1	4	5	5
2019	5	5	2	5	5	5
2020	17	7	4	5	5	5
2021	28	8	6	6	5	5
2022	33	10	7	6	5	5
2023	36	17	8	6	5	5

## Sheet: MostRelAuthors
Authors	Articles	Articles Fractionalized
GALBREATH J	3	2
MARTINEZ MDV	3	1
AGARWAL S	2	0.366667
AHMED M	2	0.47619
CHATJUTHAMARD P	2	0.583333
DARKWAH A	2	0.291667
DJENONTIN I	2	0.291667
FISCHER G	2	0.291667
GARCIA-SANCHEZ IM	2	0.833333
ISSA A	2	1.33333
KAMOTO J	2	0.291667
KAMPANJE-PHIRI J	2	0.291667
LI JT	2	1.5
MEINZEN-DICK R	2	0.666667
NA	2	2
NARAYANAN Y	2	2
POHLMANN A	2	2
RAMBAUD SC	2	0.666667
REED MG	2	1.5
RESURRECCION BP	2	1.33333
SHRESTHA B	2	0.5
TISCH D	2	1
ZAID MAA	2	0.533333
ABATEMARCO T	1	1
ABDELWAHED NAA	1	0.333333
ABRO MMQ	1	0.142857
ABU-DALO M	1	0.166667
ABU-RABIA-QUEDER S	1	0.5
ABUHIJLEH STF	1	0.2
ADEOTI AI	1	0.333333
ADIB M	1	0.2
ADIL H	1	0.142857
AGARWAL B	1	1
AGENBROAD A	1	0.25
AGGRAWAL D	1	0.333333
AGORAMOORTHY G	1	0.333333
AGRAWAL AM	1	0.2
AGRAWAL S	1	0.5
AGRAWAL V	1	0.2
AGUSTSSON HO	1	0.0833333
AHLBORG H	1	0.5
AHMAD SH	1	0.25
AKHTER J	1	0.5
AKURUGU CA	1	0.333333
AL-QAHTANI M	1	0.25
ALAM MS	1	0.333333
ALARCON D	1	0.5
ALARCON JMS	1	0.5
ALAWADI A	1	0.25
ALBER G	1	0.333333
ALBLOUSHY H	1	0.5
ALHAMA JS	1	0.2
ALHARTHI M	1	0.142857
ALI W	1	0.142857
ALLAN JA	1	1
ALMALKI DK	1	0.5
ALODAT AY	1	0.25
ALSHAMI SA	1	0.142857
ALSULAMI A	1	0.333333
ALUKO YA	1	0.5
AMARATUNGA D	1	0.5
AMORELLI MF	1	0.5
ANAND JC	1	0.333333
ANDREADAKIS N	1	0.166667
ANDRIANI Y	1	0.25
ANGOS TN	1	1
ANSER MK	1	0.142857
APOSTU SA	1	0.25
ARAYAKARNKUL P	1	0.333333
AREVALO JA	1	1
ARI I	1	0.25
ARMITAGE DR	1	0.5
ARORA-JONSSON S	1	0.166667
ASIYANBOLA AR	1	1
ASKAR SE	1	0.142857
ATAPATTU S	1	0.125
ATEHORTUA JV	1	1
ATES HC	1	0.2
ATIF M	1	0.333333
ATMACA AC	1	0.333333
AZIZ A	1	0.2
BABUGURA AA	1	1
BACHMANN G	1	0.5
BADULESCU A	1	0.25
BADULESCU D	1	0.25
BAHTA YT	1	0.333333
BAJRACHARYA S	1	0.25
BAJRACHARYA SB	1	0.25
BAKER S	1	0.25
BANDYOPADHYAY KR	1	0.5
BANNO M	1	0.333333
BARBIR J	1	0.047619
BARDOEL A	1	0.5
BASTIAN BL	1	0.333333
BAZEL-SHOHAM O	1	0.25
BEBELLEH FD	1	0.25
BECAGLI C	1	0.25
BEGUM F	1	0.25
BEHURA AK	1	0.333333
BEITELSPACHER L	1	1
BEL-OMS I	1	0.333333
BELL MM	1	0.333333
BELWAL R	1	0.333333
BEN-AMAR W	1	0.333333
BENSON D	1	0.2
BERNARDI RA	1	0.333333
BHANDARI MP	1	0.047619
BHATIA M	1	1
BICE S	1	1
BILAL AR	1	0.25
BIRSAN A	1	0.25
BISTROM E	1	0.5
BLAKE J	1	1
BLAKE-BEARD S	1	0.25
BLESSINGER P	1	0.25
BLOMQVIST P	1	0.25
BODOUROGLOU C	1	0.5
BOLSO A	1	0.333333
BONYE SZ	1	0.25
BOOTH A	1	1
BORGES A	1	0.25
BOSCO SM	1	0.333333
BOUSRIH J	1	0.333333
BOWSER G	1	0.25
BOYKO T	1	0.25
BRAVO F	1	0.5
BROTO O	1	0.333333
BROWN LD	1	0.125
BROWN MT	1	0.5
BRUYN LLD	1	0.25
BUCKINGHAM S	1	1
BUCKINGHAM-HATFIELD S	1	1
BUEHLER R	1	1
BUNDUCHI E	1	0.111111
BUSCICCHIO G	1	0.333333
BYRNE R	1	0.333333
CABRERA AJN	1	0.5
CAHOON K	1	0.333333
CAI X	1	0.166667
CALABRESE A	1	0.25
CALDERON CI	1	0.125
CAMPO R	1	0.25
CANEBA LM	1	0.5
CARDEY S	1	0.25
CARETTA MA	1	0.2
CARFORA V	1	0.333333
CARNEY JA	1	0.333333
CARVAJAL M	1	0.333333
CATELLANI P	1	0.333333
CAZCARRO I	1	0.333333
CENTENO EF	1	1
CERVANTES PAM	1	0.333333
CHANG CC	1	0.333333
CHANG M	1	0.333333
CHAWAWA M	1	0.5
CHEEMA IY	1	0.2
CHEN D	1	0.333333
CHEN J	1	0.333333
CHEN QB	1	0.333333
CHEN Z	1	0.333333
CHENG K	1	0.5
CHIBLOW S	1	1
CHIWUZIE A	1	0.5
CHOPRA SS	1	0.333333
CHOWDHURY AR	1	0.5
CHOWDHURY MF	1	0.333333
CHOWDHURY SA	1	0.333333
CIFUENTES-FAURA J	1	0.333333
CIUCAN-RUSU L	1	0.111111
CIUCOS M	1	0.25
CLANCY J	1	0.333333
COFIE O	1	0.333333
COLAKOGLU MH	1	0.333333
COLFER CJP	1	0.166667
COMES CA	1	0.111111
CONNELL KYH	1	0.5
CONNOR M	1	0.5
CONSTANT KP	1	1
CONTRERAS-MEDINA DI	1	0.25
COOK A	1	0.333333
COSTA R	1	0.25
COTEL A	1	0.166667
CRISOSTOMO VL	1	0.333333
CRUZ-TORRES ML	1	0.5
CUELLAR-GOMEZ OL	1	1
CUNNISON S	1	1
CURCIC NV	1	0.333333
D'SOUZA C	1	0.5
DABARA DI	1	0.5
DAMYANOVIC D	1	1
DANIEL-VASCONCELOS V	1	0.333333
DARVIN L	1	0.5
DAVIDSON D	1	0.5
DAVIES O	1	0.5
DAYOUR F	1	0.25
DE GROOT J	1	0.5
DE LA FUENTE-CABRERO C	1	0.333333
DE MASI S	1	0.25
DEBARBIEUX B	1	0.5
DELIOGLAN S	1	0.2
DEMOTTS RB	1	1
DIMOU A	1	0.25
DINIS MAP	1	0.047619
DJORDJEVIC V	1	0.333333
DODDS S	1	0.333333
DOMAPIELLE MK	1	0.333333
DONI F	1	0.047619
DONKOR E	1	0.333333
DOS MUCHANGOS LS	1	0.5
DU CL	1	0.142857
DUTTA D	1	1
DUTTA S	1	0.5
EFRANTO RY	1	0.5
EGYIR I	1	0.125
EL OUAHRANI A	1	0.2
EL-IBIARY R	1	1
ELMHIRST R	1	0.333333
FAN MY	1	0.2
FAROOQI SA	1	0.5
FAURA-MARTINEZ U	1	0.333333
FAUST K	1	0.25
FEINSTEIN S	1	0.25
FENG YF	1	0.166667
FERNANDEZ-FEIJOO B	1	0.333333
FERRERAS-GARCIA R	1	0.333333
FERY M	1	0.25
FILIPPI E	1	0.333333
FJELLBORG AA	1	0.5
FLOOD J	1	1
FORTI M	1	1
FOSTER EA	1	1
FRANZ-BALSEN A	1	1
FRITZEN B	1	0.047619
FUENTES MDF	1	0.333333
FUNG BCM	1	0.333333
FURLOTTI K	1	0.25
GALLEGO-ALVAREZ I	1	0.333333
GALLETTA S	1	0.25
GALMICHE-TEJEDA A	1	0.5
GALVEZ A	1	0.333333
GANDOTRA N	1	0.5
GAUBE V	1	0.333333
GAVRILUT D	1	0.25
GAZZOLA P	1	0.25
GENNARI F	1	1
GERICKE N	1	0.5
GHANBARI Y	1	1
GHINEA R	1	0.25
GHIRON NL	1	0.25
GIBSON K	1	1
GIGAURI I	1	0.25
GILL SA	1	0.2
GILLAL FG	1	0.2
GILLAL RG	1	0.2
GJORV GH	1	0.0833333
GLASS C	1	0.333333
GLATZLE A	1	0.5
GLIGORIJEVIC V	1	0.25
GOMEZ MDD	1	0.25
GONZALEZ RD	1	0.5
GOUGH H	1	0.166667
GRAAFLAND J	1	1
GRABOWSKI P	1	0.166667
GRABOWSKI PP	1	0.125
GRAEF F	1	0.2
GRANT S	1	0.333333
GRECHI D	1	0.25
GRETZEL U	1	0.25
GRIFFIN D	1	0.25
GRUBOR A	1	0.333333
GUEVARA S	1	0.5
GUO HP	1	0.2
GUPTA H	1	0.5
GUPTA T	1	0.047619
GUZY M	1	0.25
HAGGAR J	1	0.5
HAIDER H	1	0.333333
HANAYSHA JR	1	0.333333
HARASHEH M	1	0.5
HARCOURT W	1	1
HARRIS LM	1	0.333333
HASHIM HA	1	0.25
HASSANEIN N	1	1
HAYFIELD E	1	0.0833333
HAZER O	1	0.5
HAZRA S	1	0.333333
HEAD L	1	0.333333
HERNANDEZ LEA	1	0.2
HERNANDEZ-CASTELLANO D	1	0.333333
HERTER MM	1	0.25
HESSING M	1	1
HOJNIK J	1	0.25
HOSSAIN A	1	0.25
HOSSAIN M	1	0.333333
HOSSAIN SZ	1	0.2
HOSSEN MA	1	0.2
HOUENOU MJP	1	0.125
HSU MJ	1	0.333333
HU PH	1	0.333333
HUAMBACHANO M	1	0.125
HYMA B	1	0.5
IDRIS A	1	0.25
IKHWAN M	1	0.25
IMBURGIA L	1	0.25
INGERSOLL AR	1	0.333333
INGOLS C	1	0.25
IQBAL J	1	0.2
IRAVANI MR	1	1
IRVINE A	1	0.2
ISLAM MA	1	0.25
ISLAM R	1	0.25
JACOBS P	1	0.5
JACOBSON JL	1	1
JAN A	1	0.142857
JARVIS H	1	1
JATOE MM	1	0.333333
JAVEED SA	1	0.166667
JAWAD A	1	0.142857
JERNECK A	1	1
JIANG YF	1	0.2
JIN BE	1	0.5
JIN MS	1	0.333333
JIRAKIATTIKUL S	1	0.333333
JIRAPORN P	1	0.25
JOHNSSON-LATHAM G	1	0.5
JOUBERT N	1	0.333333
KACIAK E	1	0.5
KAILA M	1	0.166667
KAKABADSE N	1	0.25
KAMAL NIM	1	0.25
KAMERI-MBOTE P	1	1
KANADLI SB	1	0.25
KAR S	1	0.333333
KARAMATA E	1	0.333333
KARIM S	1	0.25
KARLSSON MT	1	0.5
KASSINIS G	1	0.25
KATSIFARAKI G	1	0.25
KEENE S	1	0.166667
KEITSCH M	1	0.25
KEITSCH MM	1	0.25
KENDALL SS	1	0.0833333
KERRAS H	1	0.25
KHALIKOVA VR	1	0.333333
KHALIQUE A	1	0.2
KHAN M	1	0.142857
KHATRI I	1	1
KHATTAK R	1	0.333333
KHUNKAEW R	1	0.333333
KIENESBERGER M	1	0.5
KIM DH	1	0.333333
KIM EM	1	1
KIM G	1	0.5
KIMULI SNL	1	0.333333
KIRAY SA	1	0.333333
KOC M	1	0.25
KONDYLIS F	1	0.25
KONIG HJ	1	0.2
KOVALEVA M	1	0.047619
KOVARIK C	1	0.333333
KOZLOVA V	1	0.047619
KRAMMING K	1	0.5
KRASAVAC BC	1	0.333333
KRISTIANSEN P	1	0.25
KRONSELL A	1	0.5
KUMARI J	1	0.333333
KUNZ NC	1	0.333333
KURIAN P	1	0.166667
KUSAKABE K	1	1
KUZ O	1	0.25
LAFUENTE-LECHUGA M	1	0.333333
LAGUNA-SANCHEZ P	1	0.333333
LAHIRI-DUTT K	1	1
LAN TT	1	0.333333
LANDRY EE	1	0.333333
LAPIEDRA R	1	0.333333
LARRAURI OD	1	0.333333
LARSON AM	1	0.166667
LATIEF R	1	0.166667
LAWSON L	1	0.5
LEACH M	1	1
LEAL W	1	0.047619
LEE SM	1	0.25
LEE YJ	1	0.5
LENKA U	1	0.2
LEONAS KK	1	0.5
LEOPIZZI R	1	0.25
LESLIE IS	1	0.333333
LESNIKOV P	1	0.333333
LEUENBERGER DZ	1	0.5
LI MH	1	0.333333
LI XL	1	0.166667
LIEN CC	1	0.333333
LIEPINS R	1	1
LIN CJ	1	0.5
LITFIN KT	1	1
LIU DZ	1	0.166667
LIU L	1	0.166667
LOPEZ-BECERRA EI	1	0.25
LOVELL RJ	1	0.333333
LOW BS	1	0.5
LOZANO R	1	0.25
LUCHS MG	1	0.5
LUNDSTROM R	1	0.5
LUO ZH	1	0.333333
LUTOMIA CK	1	0.5
LUTTE R	1	0.5
LUTZ J	1	0.333333
LYNCH NE	1	1
MA Z	1	0.25
MABROUK F	1	0.333333
MACBRIDE-STEWART S	1	0.25
MAHADEVIA D	1	1
MAHAJAN R	1	0.5
MAJID I	1	0.142857
MAJIDAH M	1	0.5
MAKI-OPAS T	1	0.333333
MALETA Y	1	1
MARINOVA D	1	0.25
MARSHALL J	1	1
MARSHALL M	1	0.333333
MARTI-BALLESTER CP	1	1
MARTIN-CERVANTES PA	1	0.333333
MARTINEZ MJ	1	0.333333
MARTINEZ-FERRERO J	1	0.333333
MARTINEZ-RODRIGO E	1	0.333333
MASEFIELD A	1	1
MATZANOS D	1	0.166667
MAYSON S	1	0.5
MAZZA T	1	0.25
MAZZU S	1	0.25
MCELWEE P	1	0.5
MCILKENNY P	1	0.333333
MCPHAIL R	1	0.25
MEDINA-CUELLAR SE	1	0.25
MEDUPIN C	1	1
MEEK WR	1	0.5
MEENAKSHI N	1	1
MEERO AA	1	0.25
MEKLACH Y	1	0.2
MELLO D	1	0.5
MENICHINI T	1	0.25
MERZOUKI A	1	0.2
MESA JM	1	0.2
MIGLIORI S	1	0.5
MINHAS A	1	0.047619
MIRALLES-QUIROS MD	1	0.333333
MIRIC N	1	0.25
MNIMBO MT	1	0.2
MOMSEN J	1	0.25
MOMSEN JH	1	1
MONTIEL MS	1	0.333333
MONZON A	1	0.125
MOODLEY V	1	0.5
MOORADIAN TA	1	0.5
MORDI C	1	0.166667
MORDI T	1	0.166667
MORENO JA	1	1
MOROZ O	1	0.25
MORRIS A	1	0.5
MUDIMU GD	1	1
MUELLER V	1	0.25
MUENSTERMANN I	1	1
MUHAMAD MR	1	0.142857
MUHAMMAD H	1	0.5
MUHOVIC A	1	0.333333
MUNGAI EM	1	0.333333
MUNJAL S	1	0.25
MURALIDHARAN S	1	0.5
MURPHY J	1	0.5
MURTZA MH	1	0.2
MUSHFIQUR R	1	0.166667
MUSLIH M	1	0.5
MWANGI E	1	0.333333
MWIRIA K	1	1
NACITI V	1	0.25
NADEEM M	1	0.333333
NAEEM MA	1	0.25
NAGUJJA S	1	0.333333
NAJJAR D	1	0.333333
NASSANI AA	1	0.142857
NCHANJI EB	1	0.5
NDIRITU SW	1	0.333333
NEGRILLO X	1	0.333333
NEIRA DP	1	0.333333
NGAH I	1	0.333333
NHEM S	1	0.5
NICOLAU M	1	0.047619
NIKOLAOU E	1	0.166667
NOBANEE H	1	0.25
NWAGBARA U	1	0.166667
O'NEILL R	1	0.25
OBISESAN OO	1	0.5
OCKWELL D	1	0.333333
ODDSDOTTIR EE	1	0.0833333
ODROWAZ-COATES A	1	1
OKTAVILIA S	1	0.333333
OKUWA OB	1	0.5
OLADELE OI	1	0.333333
OLAYIDE OE	1	0.5
OLLER IMP	1	0.333333
OLONG MA	1	1
OLSSON D	1	0.5
OLTEAN A	1	0.111111
OPARAOCHA S	1	0.5
OPATA CC	1	1
ORGANO V	1	0.333333
ORUH ES	1	0.166667
OSBAHR H	1	0.25
OSUNMUYIWA O	1	0.5
OTENG-ABABIO M	1	1
OUTSIOS G	1	0.5
OYANEDEL-CRAVER V	1	0.166667
OZCOMLEKCI G	1	0.2
OZDEMIR G	1	0.5
PACI A	1	0.25
PAILMAN W	1	0.5
PAL M	1	0.5
PALAKSHAPPA N	1	0.333333
PALLARES-BLANCH M	1	0.333333
PAN CL	1	0.2
PANAIT M	1	0.25
PANAYIOTOU A	1	0.25
PANDEY S	1	1
PAPANGKORN S	1	0.25
PAPAVASILEIOU V	1	0.166667
PARRY S	1	0.5
PAVIONE E	1	0.25
PAZOKINEJAD Z	1	0.333333
PENG MYP	1	0.142857
PETROV A	1	0.0833333
PEZZETTI R	1	0.25
PHILLIPS M	1	0.333333
PILGERAM R	1	1
PIMPA N	1	1
PINTO DC	1	0.25
PLA-JULIAN I	1	0.5
POLATOZ S	1	0.2
POLEACOVSCHI C	1	0.25
POPA MA	1	0.111111
POTHISARN T	1	0.25
POWELL M	1	0.25
PRATI G	1	0.333333
PRIOR T	1	0.0833333
PROKOP V	1	0.25
PROVASI R	1	0.5
PUCHETA-MARTINEZ MC	1	0.333333
PUIG-DENIA A	1	0.333333
PUREVJAV B	1	1
QALATI SA	1	0.2
QI WH	1	0.2
QIAN S	1	0.166667
QUISUMBING AR	1	0.333333
QURESHI MI	1	0.142857
RABBANI MR	1	0.25
RAD S	1	0.2
RADITLOANENG W	1	0.5
RAFIQUE S	1	1
RAHMAN HU	1	0.142857
RAHMAN MM	1	0.2
RAHMAN O	1	0.333333
RAJWANI T	1	0.333333
RAMASAR V	1	0.5
RASHID N	1	0.142857
RATTEN V	1	1
REGUERA-ALVARADO N	1	0.5
REMIGIO AA	1	1
RHAMAN PH	1	0.25
RHEE CS	1	0.333333
RIACH K	1	0.5
RIAL MAL	1	1
RIBEIRO MD	1	0.333333
RIVERA MEC	1	0.333333
RODENBURG J	1	0.5
RODRIGUEZ-PERALTA CM	1	0.25
ROHR U	1	0.333333
ROKIS R	1	1
ROMERO S	1	0.333333
ROSATO P	1	0.25
ROSNITA	1	0.25
ROSSI P	1	0.25
ROY A	1	0.25
ROZANOVA-SMITH M	1	0.0833333
RUDA M	1	0.25
RUDAZ G	1	0.5
RUEST-ARCHAMBAULT E	1	1
RUIZ-BLANCO S	1	0.333333
RUIZ-JIMENEZ JM	1	0.333333
RUSSELL Z	1	1
RYSZKOWSKI L	1	1
SABELIS I	1	0.333333
SADOWSKI RF	1	1
SAGLAM C	1	0.5
SAHYOUNI A	1	0.2
SAITO L	1	0.166667
SALEHI S	1	0.333333
SALES-ZAGUIRRE J	1	0.333333
SALLEH Z	1	0.25
SALVIA AL	1	0.047619
SAMMALISTO K	1	0.25
SAN ONG T	1	0.166667
SAN SS	1	0.5
SANCHEZ-GOMEZ J	1	0.25
SANCHEZ-NAVARRO JL	1	0.25
SANDOLE DJD	1	0.5
SANTOS CA	1	0.333333
SASTRE-MERINO S	1	0.333333
SATO C	1	0.5
SAXENA LP	1	0.25
SCANLAN SJ	1	1
SCHEYVENS R	1	1
SCHMINK M	1	0.5
SEAGER J	1	1
SEBASTIAN-LOPEZ M	1	0.5
SEGOVIA-PEREZ M	1	0.333333
SENDAWULA K	1	0.333333
SENER A	1	0.5
SENGUPTA M	1	0.5
SERRADELL-LOPEZ E	1	0.333333
SHAPIRO M	1	0.25
SHARMA M	1	0.047619
SHEARER RR	1	1
SHEEHAN K	1	0.5
SHENNAN C	1	0.333333
SHERIFF G	1	0.25
SHIEH P	1	0.333333
SHIEL C	1	0.047619
SHINBROT XA	1	0.25
SHOHAM A	1	0.25
SHU G	1	0.25
SHULLA K	1	0.047619
SIAR SV	1	0.5
SIMA M	1	0.047619
SIMON-KUMAR R	1	0.25
SINCLAIR AJ	1	0.333333
SINGH G	1	0.333333
SINGH J	1	0.333333
SINGH K	1	0.2
SINGHANIA S	1	0.333333
SIULEMBA GK	1	0.5
SLOMKA-GOLEBIOWSKA A	1	0.25
SMALE M	1	0.333333
SMETSCHKA B	1	0.333333
SMIESZEK M	1	0.0833333
SMITH C	1	0.25
SMITH K	1	1
SNIDER A	1	0.125
SPALING H	1	0.333333
SPITERI J	1	0.047619
STAROSTE I	1	0.5
STATE C	1	0.25
STEFAN AB	1	0.111111
STEFAN D	1	0.111111
STRYDOM DB	1	0.333333
STULL VJ	1	0.125
SUAREZ-FERNANDEZ O	1	0.333333
SULLIVAN DM	1	0.5
SULTANA Z	1	0.2
SULUN EE	1	1
SUN Y	1	0.333333
SUNG J	1	0.5
SUTTIPUN M	1	0.333333
SVENSSON EM	1	0.0833333
TAGHIAN M	1	0.5
TAMIRU M	1	0.333333
TANDON I	1	0.2
TANSKI M	1	1
TAWFIQ WA	1	0.5
TECHATO K	1	0.333333
TELESIENE A	1	0.333333
THERIAULT V	1	0.333333
THOMASSLAYTER BP	1	1
THUY NN	1	0.333333
TIBILETTI V	1	0.25
TIMUS M	1	0.111111
TIRADO F	1	0.333333
TIRCA DM	1	0.047619
TIWARI S	1	0.25
TIWARI SR	1	0.25
TOPFER K	1	0.5
TORRES-MANCERA R	1	0.333333
TOVMASYAN G	1	1
TOWNSEND J	1	0.5
TREEPONGKARUNA S	1	0.333333
TRENTO S	1	0.333333
TRIANI S	1	0.25
TRIANTAFYLLIDIS S	1	0.5
TRIPATHI S	1	0.047619
TSAI LT	1	0.333333
TSANI S	1	0.047619
TULLA AF	1	0.333333
TURNER IM	1	0.166667
UCKERT G	1	0.2
UL HAQ A	1	0.166667
ULGIATI S	1	0.5
UTAMI S	1	0.333333
VANEK SJ	1	0.333333
VASIC P	1	0.25
VASILE V	1	0.111111
VAUGHTER P	1	0.5
VERA A	1	0.333333
VERMIGLIO C	1	0.25
VERSTRAETEN I	1	0.166667
VIJ S	1	0.2
VINTILA L	1	0.25
VINZ D	1	1
VOJKOVIC G	1	0.25
VON HAARTMAN R	1	0.25
VOYLES TB	1	1
WAHYUNINGRUM IFS	1	0.333333
WAITT G	1	0.333333
WAKUNUMA K	1	0.047619
WALLACE C	1	0.2
WANG HY	1	0.2
WANG LF	1	0.25
WANG M	1	0.2
WANG Q	1	0.25
WANG ST	1	0.333333
WARNECKE T	1	1
WEAVEN S	1	0.25
WELLER I	1	1
WELSH DHB	1	0.5
WICHIANRAK J	1	0.333333
WIDAYATI A	1	0.25
WILKINS K	1	0.25
WILLIAMS VK	1	0.0833333
WILLIAMSON KJ	1	0.0833333
WILLIS K	1	1
WOLFRAM M	1	0.5
WOO H	1	0.5
WOO S	1	0.333333
WOOD BP	1	0.333333
WYPLER J	1	0.333333
XABA T	1	0.5
XANTHACOU Y	1	0.166667
YASMIN T	1	0.333333
YIRIDOMOH GY	1	0.25
YOUNG A	1	1
YULIDA R	1	0.25
YUMARNI T	1	0.5
ZAHEDI S	1	1
ZAHID M	1	0.142857
ZAMAN K	1	0.142857
ZAMAN R	1	0.333333
ZANG Y	1	0.333333
ZAPLETAL D	1	0.25
ZGUIR MF	1	0.25
ZHANG PY	1	0.25
ZHANG WZ	1	0.166667
ZHANG YL	1	0.333333
ZHANG ZG	1	0.166667
ZHU SY	1	0.25
ZIMMERER KS	1	0.333333
ZIZMOND E	1	0.25
ZULU L	1	0.125

## Sheet: MostRelAffiliations
Affiliation	Articles
UNIV WISCONSIN	8
UNIV SASKATCHEWAN	7
UNIV SUSSEX	6
PRINCE SONGKLA UNIV	5
UNIV BRITISH COLUMBIA	5
CHULALONGKORN UNIV	4
LUND UNIV	4
MASSEY UNIV	4
NORWEGIAN UNIV SCI AND TECHNOL	4
PENN STATE UNIV	4
UNIV GHANA	4
UNIV GRANADA	4
UNIV TEKN	4
A (CORRESPONDING AUTHOR)	3
CARDIFF UNIV	3
COLORADO STATE UNIV	3
CTR INT FORESTRY RES	3
DONGBEI UNIV FINANCE AND ECON	3
EWHA WOMANS UNIV	3
GEORGE MASON UNIV	3
INT FOOD POLICY RES INST	3
IOWA STATE UNIV	3
ISLAMIA UNIV BAHAWALPUR PAKISTAN	3
JIANGSU UNIV	3
KING SAUD UNIV	3
LA TROBE UNIV	3
LILONGWE UNIV AGR AND NAT RESOURCES	3
LVIV POLYTECH NATL UNIV	3
MAKERERE UNIV	3
MERSIN UNIV	3
MICHIGAN STATE UNIV	3
MONASH UNIV	3
NATL FORMOSA UNIV	3
NORTH CAROLINA STATE UNIV	3
SKYLINE UNIV COLL	3
UNIV ALBERTA	3
UNIV ALMERIA	3
UNIV AUTONOMA BARCELONA	3
UNIV FLORIDA	3
UNIV GREENWICH	3
UNIV OBERTA CATALUNYA	3
UNIV READING	3
UNIV SALAMANCA	3
UNIV STIRLING	3
ARIZONA STATE UNIV	2
BANGLADESH AGR UNIV	2
BRUNEL UNIV	2
BUCHAREST UNIV ECON STUDIES	2
CURTIN UNIV	2
DE MONTFORT UNIV	2
DEAKIN UNIV	2
GOTHENBURG UNIV	2
GRIFFITH UNIV	2
HOHAI UNIV	2
INST NATL ECON	2
INT RICE RES INST	2
KING ABDULAZIZ UNIV	2
MANCHESTER METROPOLITAN UNIV	2
NAMIK KEMAL UNIV	2
NATL TAIWAN OCEAN UNIV	2
NATL TAIWAN UNIV SCI AND TECHNOL	2
ROLLINS COLL	2
SIMON DIEDONG DOMBO UNIV BUSINESS AND INTEGRATED DE	2
TAYLOR UNIV	2
TRIBHUVAN UNIV	2
UNIV AUCKLAND	2
UNIV BARI ALDO MORO	2
UNIV BRESCIA	2
UNIV CALIF DAVIS	2
UNIV DEV STUDIES	2
UNIV GENEVA	2
UNIV GOTHENBURG	2
UNIV IBADAN	2
UNIV IDAHO	2
UNIV INSUBRIA	2
UNIV JOHANNESBURG	2
UNIV LIVERPOOL	2
UNIV MALAYSIA TERENGGANU	2
UNIV MANCHESTER	2
UNIV MELBOURNE	2
UNIV MICHIGAN	2
UNIV MILANO BICOCCA	2
UNIV NEGERI SEMARANG	2
UNIV OREGON	2
UNIV OXFORD	2
UNIV PASSO FUNDO	2
UNIV PRIMORSKA	2
UNIV SEVILLE	2
UNIV TEXAS AUSTIN	2
UNIV TRENTO	2
UNIV VERMONT	2
UNIV VIGO	2
UNIV WASHINGTON	2
UNIV WESTERN AUSTRALIA	2
UNIV WESTERN SYDNEY	2
UNIV ZARAGOZA	2
UNIV ZIMBABWE	2
UTAH STATE UNIV	2
WORLD BANK	2
ABDUL WALI KHAN UNIV MARDAN	1
ABU DHABI UNIV	1
AFRICAN CTR TECHNOL STUDIES	1
AGR UNIV ECUADOR	1
AHMEDABAD UNIV	1
AKAMAI UNIV	1
ALLIANCE UNIV	1
ALPEN ADRIA UNIV	1
AMER UNIV DUBAI	1
AMITY UNIV	1
ARAVA INST ENVIRONM STUDIES	1
ARCTIC UNIV NORWAY	1
ARMENIAN STATE UNIV ECON	1
ASIAN INST TECHNOL MANAGEMENT AITM	1
ASIAN UNIV WOMEN	1
AUBURN UNIV	1
AUSTRALIAN NATL UNIV	1
BABSON COLL	1
BANGLADESH ASSOC WOMEN SCIENTISTS BAWS	1
BEIJING JIAOTONG UNIV	1
BEN GURION UNIV NEGEV	1
BOURNEMOUTH UNIV	1
BRANDON UNIV	1
BRIDGEWATER STATE UNIV	1
BROCK UNIV	1
BRUNEL UNIV LONDON	1
CARDINAL STEFAN WYSZYNSKI UNIV WARSAW	1
CENT UNIV JAMMU	1
CHALMERS UNIV TECHNOL	1
CHANGCHUN UNIV TECHNOL	1
CHARLES STURT UNIV	1
CHINESE UNIV HONG KONG	1
CHUNG ANG UNIV	1
CITY UNIV HONG KONG	1
CITY UNIV SCI AND INFORMAT TECHNOL	1
CLARK UNIV	1
COLL BASIC EDUC	1
COLL BUSINESS ECON AND ENTREPRENEURSHIP	1
COLL WILLIAM AND MARY	1
CONSTANTIN BRANCUSI UNIV TARGU JIU	1
CORNELL UNIV	1
COVENTRY UNIV	1
CTR INDIGENOUS KNOWLEDGE AND ORG DEV	1
CTR INT AGR TROP	1
CTR INVEST AND ASISTENCIA TECNOL AND DISETIO ESTADO J	1
CTR SCI AND ENVIRONM	1
CURTIN UNIV TECHNOL	1
DALHOUSIE UNIV	1
DALIAN MINZU UNIV	1
DAMASCUS UNIV	1
DEKALB COLL	1
DELHI TECHNOL UNIV	1
DOUGLAS COLL	1
EDINBURGH NAPIER UNIV	1
EDITH COWAN UNIV	1
ENVIRONM RES AND STUDIES CTR	1
ERASMUS UNIV	1
ESPM BUSINESS SCH	1
ETC FDN	1
FAC BUILT ENVIRONM	1
FAC ECON	1
FED POLYTECH EDE	1
FED UNIV CEAR	1
FOSHAN UNIV	1
FREE UNIV BERLIN	1
FREE UNIV BOZEN BOLZANO	1
FUTURE UNIV EGYPT	1
G DANNUNZIO UNIV CHIETI PESCARA	1
GENDERCC WOMEN CLIMATE JUSTICE	1
GEORGE EMIL PALADE UNIV MED PHARM SCI AND TECHNOL T	1
GEORGE WASHINGTON UNIV	1
GLA UNIV	1
GREAT LAKES INST MANAGEMENT	1
GRIFFITH INST HIGHER EDUC	1
GUILIN UNIV ELECT TECHNOL	1
GULF UNIV SCI AND TECHNOL	1
HACETTEPE UNIV	1
HAMAD BIN KHALIFA UNIV	1
HAMBURG UNIV APPL SCI	1
HERIOT WATT UNIV	1
HETL ASSOC	1
HSE UNIV	1
HUMBOLDT UNIV	1
HUNAN CITY UNIV	1
IIHMR UNIV	1
ILMA UNIV	1
INDIAN INST TECHNOL	1
INDIAN INST TECHNOL ISM	1
INDUKAKA IPCOWALA INST MANAGEMENT	1
INST ADV STUDY SUSTAINABIL	1
INST AGR ECON	1
INST GEOG	1
INST GEOG SCI AND NAT RESOURCES RES	1
INST LAND USE SYST	1
INST MULTIDISCIPLINAR EMPRESA IME	1
INST PLANT AND ENVIRONM PROTECT	1
INST SOCIO ECON	1
INST VEGETABLE CROPS	1
INT INST TROP AGR	1
INT ISLAMIC UNIV MALAYSIA	1
INT MANAGEMENT INST NEW DELHI	1
INT WATER MANAGEMENT INST	1
INTEGRATED RURAL DEV CTR CATALONIA CEDRICAT	1
IRAN NATL SCI FDN INSF	1
ISLAMIC AZAD UNIV	1
ISTANBUL MEDENIYET UNIV	1
JADAVPUR UNIV	1
JAUME UNIV	1
JIAYING UNIV	1
JILIN UNIV	1
JINAN UNIV	1
JORDAN UNIV SCI AND TECHNOL	1
KARLSTAD UNIV	1
KAUNAS UNIV TECHNOL	1
KAZI SHAHID FDN	1
KEIO UNIV	1
KENYA AGR AND LIVESTOCK RES ORG	1
KENYATTA UNIV	1
KING FAISAL UNIV	1
KINGDOM UNIV	1
KINGS UNIV COLL	1
KOGI STATE UNIV	1
KONJU NATL UNIV	1
KOZMINSKI UNIV	1
KYUNG HEE UNIV	1
LANCANG KUNING UNIV	1
LEIBNIZ INST ECOL URBAN AND REG DEV IOER	1
LOYOLA MARYMOUNT UNIV	1
MACQUARIE UNIV	1
MAHIDOL UNIV	1
MANHATTAN COLL	1
MARIA GRZEGORZEWSKA UNIV	1
MCGILL UNIV	1
MIL COLL SOUTH CAROLINA	1
MONTCLAIR STATE UNIV	1
MURDOCH UNIV	1
NA	1
NANJING AGR UNIV	1
NATL CHUNG HSING UNIV	1
NATL PINGTUNG UNIV	1
NATL SECRETARY HIGHER EDUC SCI TECHNOL AND INNOVAT	1
NATL SUN YAT SEN UNIV	1
NATL UNIV MANAGEMENT	1
NATL UNIV SINGAPORE	1
NECMETTIN ERBAKAN UNIV	1
NEOMA BUSINESS SCH	1
NEWCASTLE UNIV	1
NIDA BUSINESS SCH	1
NONG LAM UNIV	1
NORTH MINZU UNIV	1
NORTHEAST NORMAL UNIV	1
NORTHWEST UNIV	1
NOTREPORTED	1
OHIO UNIV	1
OREGON STATE UNIV	1
OXFORD BROOKES UNIV	1
PALESTINE TECH UNIV	1
PEACE RES INST OSLO PRIO	1
PETR GAS UNIV PLOIESTI	1
POLISH ACAD SCI	1
PRINCESS NOURAH BINT ABDULRAHMAN UNIV	1
QUEENS UNIV	1
RIAU UNIV	1
RIGHTS AND RESOURCES INITIAT	1
RISEBA UNIV APPL SCI	1
ROGER WILLIAMS UNIV	1
ROYAL UNIV WOMEN	1
RUSSIAN STATE HYDROMETEOROL UNIV	1
RUTGERS STATE UNIV	1
RYERSON UNIV	1
SARHAD UNIV SCI AND INFORMAT TECHNOL	1
SCH ENVIRONM RESOURCES AND DEV	1
SCH PUBL AND INT AFFAIRS	1
SCI CTR DEAD SEA AND ARAVA	1
SE ASIAN FISHERIES DEV CTR	1
SEJONG UNIV	1
SHANXI UNIV FINANCE AND ECON	1
SIMMONS COLL	1
SOHAR UNIV	1
SOKOINE UNIV AGR	1
SOUTH CHINA AGR UNIV	1
SOUTHERN METHODIST UNIV	1
ST ANDREW FIRST CALLED GEORGIAN UNIV	1
ST JOHNS UNIV	1
STATE GRID ENERGY RES INST CO LTD	1
STRATHMORE UNIV	1
SUFFOLK UNIV	1
SUKKUR IBA UNIV	1
SULEYMAN DEMIREL UNIV	1
SUMY STATE UNIV	1
SUNY COLL CORTLAND	1
SUPER UNIV	1
SURREY UNIV	1
SUSTAINABIL RES CTR ARTEC	1
SWEDISH UNIV AGR SCI	1
SWINBURNE UNIV TECHNOL	1
TAJEN UNIV	1
TAY NGUYEN UNIV	1
TECH FEMALE COLL	1
TECH UNIV DRESDEN	1
TELKOM UNIV	1
TEMPLE UNIV	1
THAMMASAT UNIV	1
TILBURG UNIV	1
TZU CHI UNIV	1
UNITED ARAB EMIRATES UNIV UAEU	1
UNITED INT UNIV	1
UNIV ABDELMALEK ESAADI MHANNECH II	1
UNIV ADDIS ABABA	1
UNIV AEGEAN	1
UNIV AGR FAISALABAD BUREWALA CAMPUS	1
UNIV AUCKLANDS	1
UNIV AUTONOMA ESTADO HIDALGO	1
UNIV AVEIRO	1
UNIV BAHRAIN	1
UNIV BASQUE COUNTRY UPV EHU	1
UNIV BELGRADE	1
UNIV BIRMINGHAM	1
UNIV BOTSWANA	1
UNIV BREMEN	1
UNIV BRIGHTON	1
UNIV BRISTOL	1
UNIV CALIF LOS ANGELES	1
UNIV CALIF SANTA CRUZ	1
UNIV CAPE TOWN	1
UNIV CATANIA	1
UNIV CATTOLICA SACRO CUORE	1
UNIV CENT MISSOURI	1
UNIV COLL CORK	1
UNIV COLL DUBLIN	1
UNIV CORDOBA	1
UNIV CYPRUS	1
UNIV DAYTON	1
UNIV DELHI	1
UNIV DHAKA	1
UNIV EASTERN FINLAND	1
UNIV EDINBURGH	1
UNIV ENCLAVE DELHI	1
UNIV EXETER	1
UNIV EXTREMADURA	1
UNIV FAROE ISL	1
UNIV FERNANDO PESSOA UFP	1
UNIV FERRARA	1
UNIV FLORENCE ITA	1
UNIV FREE STATE	1
UNIV GAVLE	1
UNIV GUANAJUATO	1
UNIV HARIPUR	1
UNIV HUDDERSFIELD	1
UNIV HUMBERSIDE	1
UNIV ICELAND	1
UNIV ILLINOIS	1
UNIV IOANNINA	1
UNIV ISFAHAN	1
UNIV JENDERAL SOEDIRMAN	1
UNIV KWAZULU NATAL	1
UNIV LANCASTER	1
UNIV LEEDS	1
UNIV LEON	1
UNIV MALAGA	1
UNIV MALTA	1
UNIV MANITOBA	1
UNIV MAZANDARAN	1
UNIV MESSINA	1
UNIV MONTERREY	1
UNIV MURCIA	1
UNIV NACL AUTONOMA MEXICO	1
UNIV NAIROBI	1
UNIV NAT RESOURCES AND APPL LIFE SCI BOKU	1
UNIV NEBRASKA OMAHA	1
UNIV NEGERI YOGYAKARTA	1
UNIV NEW ENGLAND UNE	1
UNIV NEWCASTLE	1
UNIV NIGERIA	1
UNIV NO BRITISH COLUMBIA	1
UNIV NORTH CAROLINA GREENSBORO	1
UNIV NORTH FLORIDA	1
UNIV NORTHERN IOWA	1
UNIV NOVI SAD	1
UNIV ORADEA	1
UNIV ORT URUGUAY	1
UNIV OTAGO	1
UNIV OTTAWA	1
UNIV PARDUBICE	1
UNIV PARMA	1
UNIV PLYMOUTH	1
UNIV POLITECN CARTAGENA	1
UNIV POLITECN MADRID	1
UNIV POMPEU FABRA	1
UNIV PUGET SOUND	1
UNIV PUTRA MALAYSIA	1
UNIV QUEENSLAND	1
UNIV RAMON LLULL	1
UNIV REY JUAN CARLOS	1
UNIV RHODE ISL	1
UNIV ROMA TOR VERGATA	1
UNIV ROME NICCOLO CUSANO	1
UNIV S PACIFIC	1
UNIV SAN FRANCISCO QUITO	1
UNIV SAN FRANCISCO QUITO USFQ	1
UNIV SANTIAGO DE COMPOSTELA	1
UNIV SAO PAULO	1
UNIV SCI AND TECHNOL	1
UNIV SIENA	1
UNIV SOUTH AFRICA	1
UNIV SOUTHERN CALIF	1
UNIV SUNDERLAND	1
UNIV SYDNEY	1
UNIV TEKNOL MARA	1
UNIV TEKNOL PETRONAS	1
UNIV TEXAS SAN ANTONIO	1
UNIV TWENTE	1
UNIV VALENCIA	1
UNIV VALENCIA UVEG	1
UNIV W INDIES	1
UNIV WAIKATO	1
UNIV WATERLOO	1
UNIV WISCONSIN MADISON	1
UNIV WOLLONGONG	1
UNIV WORCESTER	1
UPPSALA UNIV	1
WAGENINGEN UNIV	1
WAGENINGEN UNIV AND RES	1
WARSAW SCH ECON PL	1
WASHINGTON UNIV	1
WESTERN CAPE DEPT AGRICULTURE	1
WILLIAM PATERSON UNIV	1
WOMENS ENVIRONM NETWORK	1
WOOSONG UNIV	1
XIAN UNIV ARCHITECTURE AND TECHNOL	1
XUZHOU UNIV TECHNOL	1
YONSEI UNIV	1
YORK UNIV	1
ZAMBIA AGR RES INST	1
ZIMBABWE OPEN UNIV	1

## Sheet: CorrAuthCountries
Country	Articles	SCP	MCP	Freq	MCP_Ratio
USA	46	39	7	0.149351	0.152174
UNITED KINGDOM	25	16	9	0.0811688	0.36
SPAIN	23	18	5	0.0746753	0.217391
	22	22	0	0.0714286	0
AUSTRALIA	19	15	4	0.0616883	0.210526
CHINA	14	9	5	0.0454545	0.357143
CANADA	13	10	3	0.0422078	0.230769
ITALY	12	9	3	0.038961	0.25
SWEDEN	9	6	3	0.0292208	0.333333
INDIA	8	8	0	0.025974	0
GERMANY	7	5	2	0.0227273	0.285714
THAILAND	6	3	3	0.0194805	0.5
INDONESIA	5	3	2	0.0162338	0.4
SOUTH AFRICA	5	3	2	0.0162338	0.4
TURKEY	5	5	0	0.0162338	0
KOREA	4	2	2	0.012987	0.5
MALAYSIA	4	2	2	0.012987	0.5
MEXICO	4	1	3	0.012987	0.75
NIGERIA	4	4	0	0.012987	0
PAKISTAN	4	1	3	0.012987	0.75
ROMANIA	4	3	1	0.012987	0.25
BANGLADESH	3	2	1	0.00974026	0.333333
ECUADOR	3	2	1	0.00974026	0.333333
GHANA	3	2	1	0.00974026	0.333333
KENYA	3	3	0	0.00974026	0
NETHERLANDS	3	3	0	0.00974026	0
NEW ZEALAND	3	2	1	0.00974026	0.333333
POLAND	3	3	0	0.00974026	0
SAUDI ARABIA	3	2	1	0.00974026	0.333333
SERBIA	3	3	0	0.00974026	0
AUSTRIA	2	2	0	0.00649351	0
BRAZIL	2	1	1	0.00649351	0.5
IRAN	2	2	0	0.00649351	0
KUWAIT	2	1	1	0.00649351	0.5
NEPAL	2	0	2	0.00649351	1
PHILIPPINES	2	1	1	0.00649351	0.5
ARMENIA	1	1	0	0.00324675	0
BELGIUM	1	1	0	0.00324675	0
BOTSWANA	1	0	1	0.00324675	1
COLOMBIA	1	1	0	0.00324675	0
CYPRUS	1	1	0	0.00324675	0
EGYPT	1	1	0	0.00324675	0
FINLAND	1	1	0	0.00324675	0
GREECE	1	1	0	0.00324675	0
ICELAND	1	0	1	0.00324675	1
IRELAND	1	0	1	0.00324675	1
ISRAEL	1	1	0	0.00324675	0
JAPAN	1	1	0	0.00324675	0
LITHUANIA	1	0	1	0.00324675	1
MOROCCO	1	0	1	0.00324675	1
NORWAY	1	1	0	0.00324675	0
OMAN	1	0	1	0.00324675	1
QATAR	1	0	1	0.00324675	1
SINGAPORE	1	1	0	0.00324675	0
SLOVENIA	1	0	1	0.00324675	1
SWITZERLAND	1	1	0	0.00324675	0
TANZANIA	1	0	1	0.00324675	1
U ARAB EMIRATES	1	1	0	0.00324675	0
UGANDA	1	1	0	0.00324675	0
UKRAINE	1	1	0	0.00324675	0
ZAMBIA	1	0	1	0.00324675	1
ZIMBABWE	1	1	0	0.00324675	0

## Sheet: CountrySciProd
region	Freq
USA	106
UK	52
SPAIN	42
CHINA	40
AUSTRALIA	29
CANADA	29
ITALY	22
INDIA	18
SWEDEN	16
PAKISTAN	13
THAILAND	13
GERMANY	12
TURKEY	12
MALAYSIA	11
GHANA	10
SOUTH AFRICA	10
INDONESIA	9
NEW ZEALAND	9
ROMANIA	9
SOUTH KOREA	9
BANGLADESH	8
SAUDI ARABIA	8
KENYA	7
NETHERLANDS	7
BRAZIL	6
NIGERIA	6
NORWAY	6
POLAND	6
SERBIA	6
MEXICO	5
ECUADOR	4
IRAN	4
UKRAINE	4
BAHRAIN	3
ICELAND	3
ISRAEL	3
MALAWI	3
NEPAL	3
TANZANIA	3
UGANDA	3
ZIMBABWE	3
AUSTRIA	2
BOTSWANA	2
GREECE	2
IRELAND	2
JAPAN	2
KUWAIT	2
PHILIPPINES	2
PORTUGAL	2
RUSSIA	2
SLOVENIA	2
SWITZERLAND	2
VIETNAM	2
ARMENIA	1
BELGIUM	1
CAMBODIA	1
COLOMBIA	1
CYPRUS	1
CZECH REPUBLIC	1
EGYPT	1
ETHIOPIA	1
FIJI	1
FINLAND	1
FRANCE	1
GEORGIA	1
GUATEMALA	1
JORDAN	1
LATVIA	1
LITHUANIA	1
MALTA	1
MOROCCO	1
MYANMAR	1
OMAN	1
PERU	1
QATAR	1
SINGAPORE	1
SYRIA	1
URUGUAY	1
ZAMBIA	1

[truncated: 16 more sheets: CountryProdOverTime, MostCitCountries, MostGlobCitDocs, RPYS, MostFreqWords, WordCloud, TreeMap, TreeMap(2), WordFreqOverTime, TrendTopics, CouplingMap(2), ThematicMap, FactorialAnalysis, Historiograph, Historiograph(2), CollabWorldMap]
