# Supplementary material
Source: MDPI journal article supplement (https://www.mdpi.com/2071-1050/15/20/14994)
Supplement: s1 [file s1 › WoS_MDPI.csv]

WoS_MDPI
Key	Item Type	Publication Year	Author	Title	Publication Title	ISSN	DOI	Abstract Note	Date	Date Added	Date Modified	Pages	Issue	Volume	Journal Abbreviation	Extra	Manual Tags
2EBKDTE3	journalArticle	1996	Mudimu, G. D.	Urban agricultural activities and women's strategies in sustaining family livelihoods in Harare, Zimbabwe	Singapore Journal of Tropical Geography	0129-7619	10.1111/j.1467-9493.1996.tb00092.x	The growing of crops on open and undeveloped spaces within urban zones in eastern and southern African cities has become an important source of food security. Urban populations have expanded without a corresponding increase in economic opportunities for employment. Economic reforms have led to the removal of subsidies on food commodities and retrenchments in the formal employment sectors. It is r…	1996-12	2023-04-16 08:40:53	2023-04-16 08:57:07	179-194	2	17	Singap. J. Trop. Geogr.	Place: Oxford Publisher: Blackwell Publ Ltd WOS:A1996WM16200006	perception; article; Africa; Africa south of the Sahara; Africa South of the Sahara; psychology; food security; Agriculture; economics; Zimbabwe; demography; human relation; Interpersonal Relations; urban population; Developing Countries; developing country; Economic Factors; Economics; Macroeconomic Factors; urban agriculture; behavior; population; women in agriculture; agriculture; Gender Issue…
AZN3MD56	journalArticle	2023	Lorono-Leturiondo, Maria; Illingworth, Sam	Gender and placemaking: talking to women about clean air and sustainable urban environments in changing cities	Journal of Place Management and Development	1753-8335	10.1108/JPMD-04-2021-0035	Purpose This purpose of this study is to explore the voices of women in conceptualizing a city with clean air, and how this relates to urban structural changes being made more environmentally and socially sustainable. Design/methodology/approach A growing body of research suggests that gender is central to placemaking, and in dealing with environmental sustainability, fear of crime, longer life e…	2023-01-27	2023-04-16 08:40:53	2023-04-16 08:56:27	91-104	1	16	J. Place Manag. Dev.	Place: Bingley Publisher: Emerald Group Publishing Ltd WOS:000847323100001	Gender; neighborhood; travel; space; acceptability; Air pollution; city; climate; health; management; participation; Placemaking; pollution; Sustainability; Urban environment
ZSXZP3QJ	journalArticle	2018	Simon-Kumar, Rachel; MacBride-Stewart, Sara; Baker, Susan; Saxena, Lopamudra Patnaik	Towards North-South Interconnectedness: a Critique of Gender Dualities in Sustainable Development, the Environment and Women's Health	Gender Work and Organization	0968-6673	10.1111/gwao.12193	Well-established bodies of scholarship that inform contemporary global debates on gender, environment and health are fundamentally based on dualistic representations of women, such as First/Third World, rich/poor and victim/polluter. In this paper, we argue that recent socioeconomic transitions - affluence in the global South and rising inequality in the global North - demand the development of g…	2018-05	2023-04-16 08:40:53	2023-04-16 08:57:04	246-263	3	25	Gend. Work. Organ.	Place: Hoboken Publisher: Wiley WOS:000430916500003	conceptual framework; gender relations; gender; sustainable development; womens status; environment; socioeconomic impact; health; climate-change; exposure; North-South; analytical framework; womens health
8HPIJYN9	journalArticle	2019	Rokis, Rohaiza	Social Enterprising Observance among B40 Urban Women for Socioeconomic Sustainability	European Journal of Sustainable Development	2239-5938	10.14207/ejsd.2019.v8n5p397	This article explores the enterprising capabilities of economically challenged women in the urban city of Kuala Lumpur, Malaysia. The study assumes that entrepreneurial awareness and entrepreneurial intention are good predictors of women who are socioeconomically sustainable. The study sample comprises the B40 women in Kuala Lumpur, Malaysia. The B40 group refers to the "bottom 40 percent" member…	2019	2023-04-16 08:40:53	2023-04-16 08:40:53	397-408	5	8	Eur. J. Sustain. Dev.	Place: Rome Publisher: European Center Sustainable Development WOS:000488622800041	Malaysia; Sustainability; entrepreneurship; B40 women; Entrepreneurial awareness; Entrepreneurial intention; Social enterprising; Urban poverty
75KXQ686	journalArticle	2016	Kassinis, George; Panayiotou, Alexia; Dimou, Andreas; Katsifaraki, Georgia	Gender and Environmental Sustainability: A Longitudinal Analysis	Corporate Social Responsibility and Environmental Management	1535-3958	10.1002/csr.1386	In this paper, we investigate the relationship between gender and environmental sustainability. Based on a sample of 296 firms, drawn from the population of US publicly traded firms over a five-year period, we empirically test whether firms that have (1) more gender diverse boards of directors and (2) more policies and practices that enable or reinforce gender diversity throughout the organizatio…	2016-12	2023-04-16 08:40:53	2023-04-16 08:56:26	399-412	6	23	Corp. Soc. Responsib. Environ. Manag.	Place: Hoboken Publisher: Wiley WOS:000388577900005	environmental sustainability; gender; women; boards; corporate boards; corporate social-responsibility; directors; diversity; firm performance; governance; panel-data; predictors; representation
8M2PKEWE	journalArticle	2017	Shoham, Amir; Almor, Tamar; Lee, Sang Mook; Ahammad, Mohammad F.	Encouraging environmental sustainability through gender: A micro-foundational approach using linguistic gender marking	Journal of Organizational Behavior	0894-3796	10.1002/job.2188	While studies show that organizational diversity is beneficial to their practice of environmental sustainability, we know very little about the effect that the gender of an individual director can have on sustainability practice. In this empirical paper, we employ a micro-foundational approach to examine whether the number of women on an organization's board of directors has a direct effect on it…	2017-11	2023-04-16 08:40:53	2023-04-16 08:56:12	1356-1379	9	38	J. Organ. Behav.	Place: Hoboken Publisher: Wiley WOS:000415694300005	environmental sustainability; gender; linguistic gender marking; micro-foundations
KPJ2GUXV	journalArticle	2019	Krasavac, Biljana Chroneos; Karamata, Ema; Djordjevic, Vladimir	INNOVATIVE POTENTIAL OF ENVIRONMENTALLY MOTIVATED FEMALE ENTREPRENEURSHIP FOR SUSTAINABLE DEVELOPMENT IN THE REPUBLIC OF SERBIA	Ekonomika Poljoprivreda-Economics of Agriculture	0352-3462	10.5937/ekoPolj1903721C	The role of women is extremely important for the economic development of every country. The objective of this paper is to study and understand how important business women are for achieving sustainable economy in Serbia, and how their skills can be utilized in that respect. A descriptive research methodology was used, with the questionnaire as a survey instrument, to demonstrate the momentous rol…	2019	2023-04-16 08:40:53	2023-04-16 08:40:53	721-735	3	66	Ekon. Poljopr.	Place: Belgrade Publisher: Balkan Scientific Assoc Agrarian Economists WOS:000504638000005	sustainable development; economic development; economic system; environment; ecology; women entrepreneurs; women entrepreneurship
YPGYPD8N	journalArticle	2020	Kijewska, Barbara; Mitroczuk, Igor	GENDER PERSPECTIVE ON CLIMATE CHANGE AND ENVIRONMENT TOWARDS SUSTAINABLE DEVELOPMENT	European Journal of Science and Theology	1841-0464		In 2015 the Pope Francis presented his Encyclical Letter 'Laudato Si" to voice the most important thoughts of the Holy See on human in general and Roman Catholic in particular response to rapid and omnipresent detrimental changes that are happening to the Planet Earth because of irresponsible actions of the human race against environment in broad sense, inducing at the same time climate change. T…	2020-12	2023-04-16 08:40:53	2023-04-16 08:56:37	63-77	6	16	Eur. J. Sci. Theol.	Place: Iasi Publisher: Acad Organisation Environmental Engineering & Sustainable Dev WOS:000605981700006	sustainable development; climate change; environment; women; behavior; equality; policy; stoves; vulnerabilities
43N768AB	journalArticle	2016	Miralles-Guasch, Carme; Martinez Melo, Montserrat; Marquet, Oriol	A gender analysis of everyday mobility in urban and rural territories: from challenges to sustainability	Gender Place and Culture	0966-369X	10.1080/0966369X.2015.1013448	Gender differences in mobility patterns between women and men have long been acknowledged. This study analyses how these differences are reproduced in different urban and rural contexts. Using mobility data from a large travel survey taken in 2006 in Spain, we examine the differences between gender mobility through age, modal split and trip purposes. Special attention is paid to how territory sha…	2016-03-03	2023-04-16 08:40:53	2023-04-16 08:55:38	398-417	3	23	Gend. Place Cult.	Place: Abingdon Publisher: Routledge Journals, Taylor & Francis Ltd WOS:000367549500006	sustainability; gender relations; gender; Spain; gender disparity; work; mobility; rural society; travel behavior; urban society; travel; women; policy; accessibility; car; daily mobility; distance; form; proximity; rural; sustainable; transport; urban
TQ8F5QTP	journalArticle	2011	Adeoti, A.; Oladele, O.; Cofie, O.	Sustainability of livelihoods through Urban Agriculture: Gender dimensions in Accra, Ghana	Life Science Journal-Acta Zhengzhou University Overseas Edition	1097-8135		This paper examines the sustainability of livelihoods through Urban Agriculture: Gender dimensions in Accra, Ghana. The population used for the study was the vegetable producers within and around Accra, Ghana. A mix of sampling techniques was followed in choosing UA producers. While a random sampling technique was employed in choosing male UA producers, all female producers who were willing to be…	2011	2023-04-16 08:40:53	2023-04-16 08:40:53	840-848	2	8	Life Sci. J.	Place: Lansing Publisher: Marsland Press WOS:000303520200108	gender; income; assets; livelihoods; resource use; Urban agriculture
9RGI48KP	journalArticle	2022	Carvajal, Mariela; Nadeem, Muhammad; Zaman, Rashid	Biodiversity disclosure, sustainable development and environmental initiatives: Does board gender diversity matter?	Business Strategy and the Environment	0964-4733	10.1002/bse.2929	Modern-day corporations are under intense stakeholder pressure to incorporate environmentalism, particularly biodiversity initiatives, into their business strategy. Building on upper echelon and gender socialization theories, we investigate the effect of board gender diversity (BGD) on the biodiversity initiatives undertaken by firms for the restoration and rehabilitation of damaged ecosystems an…	2022-03	2023-04-16 08:40:53	2023-04-16 08:55:52	969-987	3	31	Bus. Strateg. Environ.	Place: Hoboken Publisher: Wiley WOS:000714525100001	sustainable development; gender role; United States; women; governance; biodiversity disclosure; business strategy; environmental performance; gender diversity; performance; corporate strategy; biodiversity; business development; environmental economics; environmental restoration
AV8UB2LT	journalArticle	2021	Dogan, Nezahat; Kirikkaleli, Dervis	Does gender equality in education matter for environmental sustainability in sub-Saharan Africa?	Environmental Science and Pollution Research	0944-1344	10.1007/s11356-021-13452-1	The present study provides a macro-level framework for gender issues and their link to energy policies and environmental quality, in line with the sustainable development goals (SDG). It examines the relationship between environmental sustainability, gender equality in education, energy consumption, and sub-Saharan Africa's income by using cointegration analysis and autoregressive distributed lag…	2021-08	2023-04-16 08:40:53	2023-04-16 08:56:07	39853-39865	29	28	Environ. Sci. Pollut. Res.	Place: Heidelberg Publisher: Springer Heidelberg WOS:000632309400002	sustainability; gender; sustainable development; Sustainable Development Goal; education; Africa; Africa south of the Sahara; Africa South of the Sahara; carbon dioxide; Carbon Dioxide; cointegration analysis; economic development; Economic Development; energy policy; environmental quality; Gender Equity; Kuznets curve; Northern; Sub-Saharan Africa; CO2 emissions; Environmental sustainability; Ge…
DXXGDCTI	journalArticle	2022	Ullah, Farid; Jiang, Ping; Ntim, Collins G.; Shahab, Yasir; Jiang, Xianling	Female Directors' Foreign Experience and Environmental and Sustainable Performance*	Asia-Pacific Journal of Financial Studies	2041-9945	10.1111/ajfs.12369	We examine the impact of female directors' foreign experience on environmental and sustainable (ES) performance in Chinese listed firms from 2010 to 2016. We find that female directors' foreign experience, especially work experience, significantly positively impacts firms' ES performance. The results are robust, and self-selection concerns are addressed using the Heckman two-step model and propen…	2022-04	2023-04-16 08:40:53	2023-04-16 08:56:22	169-193	2	51	Asia-Pac. J. Financ. Stud.	Place: Hoboken Publisher: Wiley WOS:000822655200002	responsibility; women; diversity; firm performance; china; corporate-board; csr; Environmental and sustainable performance; Female directors' foreign experience; g34; g38; gender-differences; Knowledge transmission
EQHME484	journalArticle	2012	Adeoti, Adetola I.; Cofie, Olufunke; Oladele, Oladimeji I.	Gender Analysis of the Contribution of Urban Agriculture to Sustainable Livelihoods in Accra, Ghana	Journal of Sustainable Agriculture	1044-0046	10.1080/10440046.2011.620229	This article examines the sustainability of livelihoods through urban agriculture (UA): gender dimensions in Accra, Ghana. The population used for the study was the vegetable producers within and around Accra, Ghana. A mix of sampling techniques was followed in choosing UA producers. While a random sampling technique was employed in choosing male UA producers, all female producers who were willin…	2012-02	2023-04-16 08:40:53	2023-04-16 08:56:24	236-248	1-2	36	J. Sustain. Agric.	Place: Philadelphia Publisher: Taylor & Francis Inc WOS:000300528800014	gender; income; urban agriculture; assets; livelihoods; resource use
NPGASRPN	journalArticle	2017	Paydar, Mohammad; Kamani-Fard, Asal; Etminani-Ghasrodashti, Roya	Perceived security of women in relation to their path choice toward sustainable neighborhood in Santiago, Chile	Cities	0264-2751	10.1016/j.cities.2016.10.002	The fear of crime and perceptions of insecurity are among the most important issues with regard to a sustainability framework, relative to crime itself, in cities with low crime rates. Santiago in Chile is a city with a moderate to low rate of crime as compared to the average amount of crime in the cities around the world, but the fear of crime and perceptions of insecurity greatly concern the re…	2017-02	2023-04-16 08:40:53	2023-04-16 08:40:53	289-300		60	Cities	Patent Number: A Place: Oxford Publisher: Elsevier Sci Ltd WOS:000390740300027	vulnerability; fear; city; Built environment; crime-prevention; defensible space; Design; environmental-design; Fear of crime; gated communities; insecurity; Perceived security/insecurity; Santiago, Chile; Sustainable neighborhood; victimization
K4U982XD	journalArticle	2021	Langnel, Zechariah; Amegavi, George Babington; Agomor, Kingsley S.	Environmental degradation and female economic inclusion in sub-Saharan Africa: Effort towards Sustainable Development Goal 5	Development Southern Africa	0376-835X	10.1080/0376835X.2020.1870933	The paper examines how environmental degradation affects female economic inclusion. Using Generalised Least Squares (GLS) and Instrumental Variable Approach in Two-Stage Least Squares (IV-2SLS), a panel of 22 countries in sub-Saharan Africa was analysed for the period 1990-2013. We observe that CO2 emission (metric per capita), CO2 emissions from electricity and heat, CO2 emissions from liquid an…	2021-09-03	2023-04-16 08:40:53	2023-04-16 08:56:19	717-730	5	38	Dev. South. Afr.	Place: Abingdon Publisher: Routledge Journals, Taylor & Francis Ltd WOS:000605671900001	womens employment; vulnerability; womens status; Sustainable Development Goal; Sub-Saharan Africa; numerical model; Environmental degradation; female economic inclusion; ssa; sustainable development; econometrics; least squares method
YKAMMD2P	journalArticle	2011	Foster, Emma A.	Sustainable Development: Problematising Normative Constructions of Gender within Global Environmental Governmentality	Globalizations	1474-7731	10.1080/14747731.2010.493013	Systems of governance are legitimised as an almost indispensable response to global co-ordination over matters of environmental degradation. Considering sustainable development as the key label for 'common-sense' political approaches to environmental degradation and a key informant for international environmental policy-making activity, this article seeks to problematise such a widespread discour…	2011	2023-04-16 08:40:53	2023-04-16 08:56:53	135-149	2	8	Globalizations	Place: Abingdon Publisher: Routledge Journals, Taylor & Francis Ltd WOS:000290401500002	gender; sustainable development; environmental governance; Foucault; governmentality; heteronormativity
XPW42IPX	journalArticle	1996	Low, B. S.	Men, women, and sustainability	Population and Environment	0199-0039	10.1007/BF02208407		1996-11	2023-04-16 08:40:53	2023-04-16 08:40:53	111-141	2	18	Popul. Env.	Place: Dordrecht Publisher: Springer WOS:A1996VN52200003	19th centuries; 19th-century sweden; children; demographic-transition; evolutionary perspective; family-structure; fertility; human behavioral ecology; occupational-status; reproductive success
8KRDYUCK	journalArticle	2023	de Boer, Joop; Aiking, Harry	Pro-environmental food practices in EU countries strongly suggest mutually reinforcing improvements in gender equality and environmental sustainability	Appetite	0195-6663	10.1016/j.appet.2022.106350	This paper seeks to understand how pro-environmental food practices among women and men in the EU can be supported by considering the interlinkages between gender equality and environmental sustainability. A special aspect is that the role of gender equality is interpreted in terms of Schwartz's theory on national cultural values, which relates gender equality to cultures that emphasize intellect…	2023-01-01	2023-04-16 08:40:53	2023-04-16 08:40:53	106350		180	Appetite	Place: London Publisher: Academic Press Ltd- Elsevier Science Ltd WOS:000877553700002	meat; Sustainability; climate-change; behavior; consumption; Food practices; Gender equality; personality; preferences; Pro-environmental behavior; sex-differences; transition
85RL9WBK	journalArticle	2021	Yamamura, Eiji	Do You Want Sustainable Olympics? Environment, Disaster, Gender, and the 2020 Tokyo Olympics	Sustainability		10.3390/su132212879	The slogans of the 2020 Tokyo Olympics were "symbol of resilience from the Great East Japan Earthquake " and "Compact Olympics ". The Olympics were also expected to demonstrate "gender equality " and to enhance sustainability in modern society. However, in practice, the cost of the Tokyo Olympics 2020 was far greater than estimated. The slogan was changed to "symbol of overcoming COVID-19 " altho…	2021-11	2023-04-16 08:40:53	2023-04-16 08:56:02	12879	22	13	Sustainability	Place: Basel Publisher: Mdpi WOS:000725157900001	sustainability; gender; sustainable development; Japan; environment; environmental protection; income; impact; 2020 Tokyo Olympics; compact Olympics; covid-19; daughters; female socialization; gender difference; gender equality; natural disasters; preference; world cup; COVID-19; disaster; Olympic Games
ML79K56C	journalArticle	2023	Sadowski, Ryszard F. F.	Remarks on the Concept of a Sustainable City in Light of Konrad Lorenz's Concept of Man	Sustainability		10.3390/su15032443	For several decades now, intensive research has been carried out on the concept of a city that would be as environmentally friendly as possible, while simultaneously providing a high quality of life for its residents. As a result of this research, the concept of a sustainable city that addresses these challenges has been developed. The significance of this issue is evidenced by the fact that Sust…	2023-02	2023-04-16 08:40:53	2023-04-16 08:40:53	2443	3	15	Sustainability	Place: Basel Publisher: Mdpi WOS:000930306000001	access to nature; civilizational dangers; environmental devastation; Konrad Z; Lorenz; man's race against himself; Neolithic Revolution; overpopulation; sustainable city; urbanization
JTE3PKQF	journalArticle	2015	Pallares-Blanch, Marta; Tulla, Antoni F.; Vera, Ana	ENVIRONMENTAL CAPITAL AND WOMEN'S ENTREPRENEURSHIP: A SUSTAINABLE LOCAL DEVELOPMENT APPROACH	Carpathian Journal of Earth and Environmental Sciences	1842-4090		Developing an integrated place-based approach is necessary in order to generate sustainable policies in mountain and peripheral areas with high natural values. The High Catalan Pyrenees in Catalonia is one of these remote areas with high natural values, currently facing severe sustainability challenges. The high natural values, also called environmental capital, represent the main source of asset…	2015-08	2023-04-16 08:40:53	2023-04-16 08:56:16	133-146	3	10	Carpath. J. Earth Environ. Sci.	Place: Baia Mare Publisher: Carpathian Assoc Environment and Earth Sciences WOS:000360785200013	gender issue; sustainability; Catalonia; gender; Spain; sustainable development; womens status; entrepreneur; governance approach; rural society; space; entrepreneurship; governance; urbanization; 2nd homes; abandonment; Catalan Pyrenees; comparative advantage theory; counterurbanisation; dimension; eco-development; initiatives; natural protected areas; naturbanization; spain; value-added activit…
UU7K944J	journalArticle	2020	Graafland, Johan	Women in management and sustainable development of SMEs: Do relational environmental management instruments matter?	Corporate Social Responsibility and Environmental Management	1535-3958	10.1002/csr.1966	Scientific literature on the relationship between gender diversity in management and sustainability of large companies has produced mixed results. Whether and how gender diversity stimulates the sustainable development of small and medium sized enterprises (SMEs) has not yet been researched. We hypothesize that having more women in management positions improves the sustainability of SMEs, because…	2020-09	2023-04-16 08:40:53	2023-04-16 08:57:09	2320-2328	5	27	Corp. Soc. Responsib. Environ. Manag.	Place: Hoboken Publisher: Wiley WOS:000534385500001	gender; sustainable development; boards; directors; diversity; performance; csr; impacts; relational environmental management; SMEs; women in management
ZJX2M9VA	journalArticle	2022	Vajjarapu, Harsha; Verma, Ashish	Understanding the mitigation potential of sustainable urban transport measures across income and gender groups	Journal of Transport Geography	0966-6923	10.1016/j.jtrangeo.2022.103383	The global climate is going through a transformation due to increased GHG emissions. Urban transportation is one of the leading contributors to increased GHG emissions due to its dependency on fossil fuels. Mitigation measures are evaluated globally to reduce the emissions from the transport sector. These mitigation strategies have a disproportionate effect on the income-gender groups, and the em…	2022-06	2023-04-16 08:40:53	2023-04-16 08:57:05	103383		102	J. Transp. Geogr.	Place: Oxford Publisher: Elsevier Sci Ltd WOS:000811224100003	Gender; sustainable development; gender role; income distribution; climate change; Climate change; policy approach; equity; travel; transportation planning; urban transport; climate-change; Carbon emissions; carbon-dioxide emissions; co2 emissions; decomposition; Equity; greenhouse-gas emissions; Mitigation; passenger transport; policies; public transport; Urban transportation; mitigation; carbon…
286QNWUB	journalArticle	2020	Kumari, Jyoti; Behura, Ajit Kumar; Kar, Sarita	Women's Attitude Towards Environment Sustainability Through Natural Preservation	Problemy Ekorozwoju	1895-6912		Women could have played a significant part in the process of Sustainable Development, although they were not given an opportunity to directly involve in this process in different cultures. Their roles are mainly subjected to perform household works, such as caring for children and elderly members. However, these familial responsibilities of women develop a positive attitude and potential skills t…	2020	2023-04-16 08:40:53	2023-04-16 08:40:53	103-107	1	15	Probl. Ekorozw.	Place: Lublin Publisher: Politechnika Lubelska WOS:000507499100012	sustainable development; environment; women; eco-feminism; natural resources
KHS6IJHH	journalArticle	2016	Glass, Christy; Cook, Alison; Ingersoll, Alicia R.	Do Women Leaders Promote Sustainability? Analyzing the Effect of Corporate Governance Composition on Environmental Performance	Business Strategy and the Environment	0964-4733	10.1002/bse.1879	In this study, we investigate the impact women leaders have on the corporate environmental strategies of organizations. Using a dataset of all Fortune 500 CEOs and boards of directors for a ten-year period, we examine several aspects of gender in leadership on environmental strategy. Specifically, we test the impact of women CEOs, the proportion of women on the BOD, the number of interlinks women…	2016-11	2023-04-16 08:40:53	2023-04-16 08:56:00	495-511	7	25	Bus. Strateg. Environ.	Place: Hoboken Publisher: Wiley WOS:000388360400003	sustainability; gender; leadership; womens organization; impact; directors; diversity; experience; board composition; environmental strategy; gender stereotypes; homophily; interlocks; network ties; organizations; power; strategy; work group diversity; corporate strategy
A4GLLCDS	journalArticle		Muhammad, Hussain; Migliori, Stefania	Effects of board gender diversity and sustainability committees on environmental performance: a quantile regression approach	Journal of Management & Organization	1833-3672	10.1017/jmo.2022.8	This study examines the effect of board gender diversity (BGD) and sustainability committees on environmental performance. Using a quantile regression approach and a sample of publicly listed firms in Italy, we find that BGD and sustainability committees have different effects on firms' environmental performance over different points of conditional distribution. This shows that BGD and sustainabi…		2023-04-16 08:40:53	2023-04-16 08:56:10	PII S1833367222000086			J. Manag. Organ.	Place: Cambridge Publisher: Cambridge Univ Press WOS:000769768600001	adaptation; women; impact; corporate social-responsibility; directors; governance; interlocks; Board gender diversity; critical mass; critical mass of female directors; environmental performance; quantile regression analysis; sustainability committees
RJX35XV9	journalArticle	2012	Olong, Matthew Adefi	Human Rights, the Environment and Sustainable Development: Nigerian Women's Experiences	Journal of Politics and Law	1913-9047	10.5539/jpl.v5n1p100	That, Nigerian women have a right to a healthful, and sustainable environment, conducive to their health, well being and the full development of their human personality, is no longer in doubt. Section 20 of the Nigerian constitution 1999, stipulates that states shall protect and improve the environment and safeguard the water, air, land, forest and wide life. Article 24 of the African charter on …	2012-03	2023-04-16 08:40:53	2023-04-16 08:40:53	100-108	1	5	J. Polit. Law	Place: Toronto Publisher: Canadian Center Science & Education WOS:000215057800010	Environment; Human rights; Nigerian environment; Sustainable development; Women
G4XDVBDN	journalArticle	2020	Medupin, Cecilia	Women in Environmental Sciences (WiES) and The UN SDGs: A Catalyst for Achieving a Sustainable Future for All	Sustainability		10.3390/su12177116	Women can serve as catalysts needed to achieve the United Nation's Sustainable Development agenda by 2030. The Women in Environmental Sciences network engaged women from culturally and professionally diverse backgrounds at two workshops held in the UK in 2018 and 2019. The interdisciplinary environmental sciences' meeting included presentations by leading women in academic and non-academic organi…	2020-09	2023-04-16 08:40:53	2023-04-16 08:57:08	7116	17	12	Sustainability	Place: Basel Publisher: Mdpi WOS:000569841900001	sustainability; future prospect; Sustainable Development Goal; spatiotemporal analysis; strategic approach; age structure; higher education; United Kingdom; environment; environmental conditions; women; equality; environmental sciences; sustainable development goals (SDGs); interdisciplinary approach
FVLTTLMG	journalArticle	2021	Shrestha, Bindu; Tiwari, Sudarshan; Bajracharya, Sushil; Keitsch, Martina	Role of gender participation in urban household energy technology for sustainability: a case of Kathmandu	Discover Sustainability		10.1007/s43621-021-00027-w	Sustainability has endured as a global topic in terms of quality of life and energy-saving for an equalized system. Households represent one of the most energy-consuming sectors globally and are expected to increase tremendously in the future. Women have higher responsibility in the household energy use in most societies. However, their participation and impacts have been less prioritized in the …	2021-12	2023-04-16 08:40:53	2023-04-16 08:56:46	19	1	2	Discov. Sustain.	Place: London Publisher: Springernature WOS:000908288900019	Sustainability; Energy; Gender participation; Household
GR82Y6ZQ	journalArticle	2017	Harcourt, Wendy	Gender and sustainable livelihoods: linking gendered experiences of environment, community and self	Agriculture and Human Values	0889-048X	10.1007/s10460-016-9757-5	In this essay I explore the economic, social, environmental and cultural changes taking place in Bolsena, Italy, where agricultural livelihoods have rapidly diminished in the last two decades. I examine how gender dynamics have shifted with the changing values and livelihoods of Bolsena through three women's narratives detailing their gendered experiences of environment, community and self. I ref…	2017-12	2023-04-16 08:40:53	2023-04-16 08:56:30	1007-1019	4	34	Agric. Human Values	Place: Dordrecht Publisher: Springer WOS:000414778800016	Bolsena; Feminist political ecology; Nature/culture
ADQLFWND	journalArticle	2008	Jacobs, Peter; Xaba, Thembi	Women in urban and peri-agriculture: Sustaining livelihoods in the Cape Metropolitan Area	Agenda-Empowering Women for Gender Equity	1013-0950		Urban and peri-urban agriculture (UPA) has emerged as one of the responses to multiple livelihood challenges that poorer city dwellers face. Urban women engage in UPA to produce food for their households and increasingly also to earn an income from the sale of surplus output. This article uses evidence from a sample of farming projects around the Cape Metropolitan Area to explore how women partic…	2008	2023-04-16 08:40:53	2023-04-16 08:57:11	186-197	78	22	Agenda-Empower. Women Gend. Equity	Place: Abingdon Publisher: Routledge Journals, Taylor & Francis Ltd WOS:000420271300020	poverty; urban agriculture; access to land; household food production; social solidarity
CGL6FTFT	journalArticle	2021	Ahamed, Tofael; Noguchi, Ryozo; Muhsin, Nazia; Purnamasari, Riska; Islam, Md Ariful; Tasnim, Farhat; Islam, Md Zamirul; Islam, Md Fakrul; Akmam, Wardatul	Sustainable agricultural development: a micro-level GIS-based study on women's perceptions of environmental protection and entrepreneurship in Japan and Bangladesh	Geojournal	0343-2521	10.1007/s10708-020-10169-5	This collaborative research focused on assessing women's perceptions and participation regarding environmental protection and developing entrepreneurship opportunities through suitability mapping in the study areas of Japan and Bangladesh to achieve the sustainable development goals (SDGs). The purpose of this study was to apply the most feasible and applicable site-specific methods from the expe…	2021-10	2023-04-16 08:40:53	2023-04-16 08:56:49	2071-2103	5	86	GeoJournal	Place: Dordrecht Publisher: Springer WOS:000520663300001	Sustainable development; empowerment; perception; gender; sustainable development; womens status; decision analysis; entrepreneur; Surveys; Bangladesh; local government; Japan; environmental protection; village; Bottom-up approach; decision; Entrepreneurship; Environmental protection; gis; information; site selection; Suitability mapping; Sustainable agricultural development; Women's perception; …
8I8WUXUI	journalArticle	2018	Aluko, Yetunde Adebunmi	Women's Use of Indigenous Knowledge for Environmental Security and Sustainable Development in Southwest Nigeria	International Indigenous Policy Journal	1916-5781	10.18584/iipj.2018.9.3.2	Indigenous women are important part of a community's social capital. This study examined women's use of Indigenous knowledge (IK) for environmental security and sustainable development in southwest Nigeria. Qualitative data was collected using in-depth interviews conducted among 80 purposively selected rural Yoruba women. The data were analysed using descriptive tools such as frequencies, percent…	2018	2023-04-16 08:40:53	2023-04-16 08:57:17	2	3	9	Int. Indig. Policy J.	Place: London Publisher: Univ Western Ontario WOS:000444835600002	women; sustainable development; environmental security; Indigenous knowledge; southwest Nigeria
GLLHN6NP	journalArticle	2020	Opata, Christian Chukwuma	Cultural Restriction, Respect for Women, and Environmental Sustainability in Africa: Extrapolations from Igboland, South-Eastern Nigeria	Asian Women	1225-925X	10.14431/aw.2020.3.36.1.25	In most African societies, some restrictions exist that manifest themselves in the form of taboos, laws on the use of public spaces, land use, and the exploitation and management of resources, which on the surface appear to be targeted at women. However, when their origin, essence, and dynamics within specific cultures are subjected to critical interrogation, a new picture emerges. What was assum…	2020-03	2023-04-16 08:40:53	2023-04-16 08:55:58	25-43	1	36	Asian Women	Place: Youngsak-Ku Publisher: Sookmyung Womens Univ WOS:000522816100002	African environment; cultural restrictions; environmental sustainability; Igbo women
W7QE824Z	journalArticle	2009	Vinz, Dagmar	Gender and Sustainable Consumption A German Environmental Perspective	European Journal of Womens Studies	1350-5068	10.1177/1350506808101764	The debate about sustainability and gender at the international level is characterized by a strong presence of international women's networks from the South. However, in Agenda 21 - the UNCED programme for sustainability in the 21st century - the situation of women in the North is barely visible. Nevertheless, Agenda 21 recommends that all states pursue strategies of sustainability at national an…	2009-05	2023-04-16 08:40:53	2023-04-16 08:56:29	159-179	2	16	Eur. J. Womens Stud.	Place: London Publisher: Sage Publications Ltd WOS:000265218100005	empowerment; sustainable development; Germany; social justice; transport; environmental politics; food; gender and environment
54YVQN2W	journalArticle	2020	Li, Xueli; Liu, Lee; Zhang, Zhenguo; Zhang, Wenzhong; Liu, Dazhi; Feng, Yafen	Gender Disparity in Perceived Urban Green Space and Subjective Health and Well-Being in China: Implications for Sustainable Urban Greening	Sustainability		10.3390/su122410538	It is generally agreed that green space has a positive effect on the health and well-being of urban residents. A number of papers have studied the relationship between green space and various sociodemographic characteristics; however, little is known about how perceptions of green space affect health and well-being differently between men and women. Such knowledge is significant for informing pol…	2020-12	2023-04-16 08:40:53	2023-04-16 08:56:36	10538	24	12	Sustainability	Place: Basel Publisher: Mdpi WOS:000603297800001	sustainability; perception; sustainable development; United Nations; greenspace; gender disparity; socioeconomic conditions; China; urban development; environment; age; green space; impact; gender equality; cover; mental-health; population; quality; subjective health; well-being
8QBA5WXT	journalArticle	1998	Pandey, S.	Women, environment, and sustainable development	International Social Work	0020-8728	10.1177/002087289804100306	Poor and vulnerable populations are disproportionately concentrated in the most ecologically degraded environments of the world. In developing countries degraded environments threaten the survival of rural households. Developing countries have been launching, in partnership with rural people, a wide variety of development programs to improve these degraded and depleted environments. The paper exa…	1998-07	2023-04-16 08:40:53	2023-04-16 08:57:12	339-+	3	41	Int. Soc. Work	Place: London Publisher: Sage Publications Ltd WOS:000075165800006	participation; policies; community forestry; deforestation; developing-countries; nepal
XGT3VG26	journalArticle	2003	Polk, M.	Are women potentially more accommodating than men to a sustainable transportation system in Sweden?	Transportation Research Part D-Transport and Environment	1361-9209	10.1016/S1361-9209(02)00034-2	The attainment of a sustainable transportation system necessitates changes in the travel behavior of individuals. In this article, a descriptive presentation of travel survey data as well as attitude surveys tests the hypothesis that women are potentially more adaptable to a sustainable transportation system than men are. This is accomplished in four parts. First, results from Swedish travel surv…	2003-03	2023-04-16 08:40:53	2023-04-16 08:40:53	75-95	2	8	Transport. Res. Part D-Transport. Environ.	Place: Oxford Publisher: Pergamon-Elsevier Science Ltd WOS:000181812000001	gender; attitude; travel behavior; car; environmental concern; automobility; social bases; sustainable transportation; time
W8HBJWAR	journalArticle	2015	Stock, Anke	Beijing, Gender and Environment - Challenges for Ecological Sustainability, Development and Justice?	Ids Bulletin-Institute of Development Studies	0265-5012	10.1111/1759-5436.12157	Twenty years ago the Beijing Declaration and Platform for Action was adopted to ... advance the goals of equality, development and peace for all women everywhere ...' (Beijing Declaration, 1995, paragraph 3). Sustainable Development Goal (SDG) Chapter K (of the Beijing Platform for Action) on women and the environment' laid down three strategic objectives, inter alia, with objective 2 being to in…	2015-07	2023-04-16 08:40:53	2023-04-16 08:55:50	54-58	4	46	IDS Bull.-Inst. Dev. Stud.	Place: Hoboken Publisher: Wiley-Blackwell WOS:000358696300009	sustainability; gender relations; sustainable development; womens status; Beijing [China]; China; environmental policy; policy implementation
DRV3BRDV	journalArticle	2019	Valls Martinez, Maria del Carmen; Cruz Rambaud, Salvador; Parra Oller, Isabel Maria	Gender policies on board of directors and sustainable development	Corporate Social Responsibility and Environmental Management	1535-3958	10.1002/csr.1825	Gender policies concerning the composition of board of directors are included in the legislation of many countries, especially promoted by the European Commission to reach gender equality in the processes of decision making. On the other hand, in the last decades, sustainable development problems caused by economic progress have enhanced the interest in environmental policies. Using the data from…	2019-11	2023-04-16 08:40:53	2023-04-16 08:40:53	1539-1553	6	26	Corp. Soc. Responsib. Environ. Manag.	Place: Hoboken Publisher: Wiley WOS:000479973100001	sustainable development; corporate social responsibility; ownership; women; corporate social-responsibility; diversity; csr; board diversity; determinants; firm; company performance; disclosure; empirical-evidence; environmental policies; gender policies; governance elements; sustainability reports
YYUYLJ7V	journalArticle	2014	Narayanan, Yamini	Quo vadis, Delhi? Urban heritage and gender: towards a sustainable urban future	International Journal of Heritage Studies	1352-7258	10.1080/13527258.2013.771790	Historic architectural heritage is important to sustainable urban planning policy, particularly in cities that have heritage sites and/or themselves have ancient archaeological value. Delhi is one of the oldest living cities in the world. However, the vision of its planning policy is limited to valuing heritage for itself and for its economic value instead of also exploring the ways in the city's…	2014-06	2023-04-16 08:40:53	2023-04-16 08:56:44	488-499	5	20	Int. J. Herit. Stud.	Place: Abingdon Publisher: Routledge Journals, Taylor & Francis Ltd WOS:000336433600002	sustainability; women; architectural heritage; Delhi
6SPH7I8V	journalArticle	2018	Meek, William R.; Sullivan, Diane M.	THE INFLUENCE OF GENDER, SELF-IDENTITY AND ORGANIZATIONAL TENURE ON ENVIRONMENTAL SUSTAINABILITY ORIENTATION	Journal of Developmental Entrepreneurship	1084-9467	10.1142/S1084946718500188	This study develops a completely new measure of environmental sustainability orientation (ESO) to examine the impact that gender, organizational identity and organizational tenure have on the sustainability orientation of existing entrepreneurs. Using a sample of 208 existing entrepreneurs, we build upon a recent stream of research in sustainable entrepreneurship that suggests understanding the E…	2018-09	2023-04-16 08:40:53	2023-04-16 08:56:59	1850018	3	23	J. Dev. Entrep.	Place: Singapore Publisher: World Scientific Publ Co Pte Ltd WOS:000449106100006	gender; Sustainability; entrepreneurship; behavior; self-identity; commitment; existing entrepreneurs; firms; organizational tenure
I225NXLA	journalArticle	2019	Wang, Shen-Tsu; Li, Meng-Hua; Lien, Chun-Chi	An Analysis of Grey Multiattribute Decision-Making Optimization Concerning Gender and Sustainable Environment	Sustainability		10.3390/su11092708	Sustainable development is defined as development that meets the needs of the present generation, but does not compromise the satisfaction of future generations' needs. It emphasizes the concept of needs and constraints. Women's lack of development is not the result of insufficient involvement in production, but the fact that much of the cost paid by women is ignored and they do not get the rewar…	2019-05-01	2023-04-16 08:40:53	2023-04-16 08:55:40		9	11	Sustainability	Place: Basel Publisher: Mdpi WOS:000469518700256	sustainability; gender; sustainable development; workplace; economic conditions; decision making; economic system; women; ecofeminism; earth; grey multiattribute decision-making; uncertainty; optimization; uncertainty analysis
E6Y22BPZ	journalArticle	2022	Bhatia, Monica	Gender and Sustainability in Ecological Intentional Communities	Environmental Sociology	2325-1042	10.1080/23251042.2021.1998297	Some environmentalists connect their activism to feminism, arguing that mitigating climate change will require transforming gender hierarchies. In this study, I consider two ecological intentional communities that attempt to meld their feminist and environmental ideals in practice. Drawing on participant observation and in-depth interviews conducted at Twin Oaks Intentional Community and Navdanya…	2022-04-03	2023-04-16 08:40:53	2023-04-16 08:40:53	199-210	2	8	Envir. Sociol.	Place: Abingdon Publisher: Routledge Journals, Taylor & Francis Ltd WOS:000713054700001	Gender; Environment; Feminism; Collective Action & Social Movements
UWHJIKDH	journalArticle	2022	Galbreath, Jeremy; Tisch, Daniel	Sustainable development in the wine industry: The impact of the natural environment and gender-diverse leadership	Sustainable Development	0968-0802	10.1002/sd.2353	There is a robust stream of research studying the external and internal drivers of cleaner production practices, yet little of this research has combined an examination of the natural environment and the demography of human agents. Building on natural resource dependence theory (NRDT), this study establishes that wine firms are highly dependent on nature (temperature, rainfall) and face uncertain…	2022-12	2023-04-16 08:40:53	2023-04-16 08:56:51	1869-1881	6	30	Sustain. Dev.	Place: Hoboken Publisher: Wiley WOS:000809669700001	sustainability; sustainable development; gender role; Australia; business; climate change; empirical analysis; leadership; ecosystem service; theoretical study; management; women; climate-change; corporate boards; directors; gender diversity; performance; responses; upper echelons; cleaner production; green consumers; industrial practice; wine industry
GXB8AGEM	journalArticle	2012	Agoramoorthy, Govindasamy; Hsu, Minna J.; Shieh, Pochuen	India's Women-led Vegetable Cultivation Improves Economic and Environmental Sustainability	Scottish Geographical Journal	1470-2541	10.1080/14702541.2012.716607	India's food security is heavily dependent on irrigation, yet large rural areas of irrigated land are threatened by increasing salinity and decreasing ground water resources. Therefore, the Johannesburg Plan of Implementation agreed at the World Summit on Sustainable Development in 2002 gives importance to sustainable rural development in developing countries. The plan mandates socio-economic dev…	2012	2023-04-16 08:40:53	2023-04-16 08:56:38	87-99	2	128	Scott. Geogr. J.	Place: Abingdon Publisher: Routledge Journals, Taylor & Francis Ltd WOS:000311240500001	sustainability; womens status; poverty; developing world; agricultural worker; rural development; India; drylands; economy; tribal women; vegetable farming; rural planning; agricultural economics; cultivation; implementation process; vegetable
K4BZIXX8	journalArticle	2013	Resurreccion, Bernadette P.	Persistent women and environment linkages in climate change and sustainable development agendas	Womens Studies International Forum	0277-5395	10.1016/j.wsif.2013.03.011	Since the 1980s, the discourse that women are intrinsically closer to nature, are hardest hit by environmental degradation, and have special knowledge of natural resource systems has influenced development policy circles and intervention programmes globally. Despite criticism being levelled time and again at the discourse's potential risk of passing on the burden of environmental care onto women …	2013-10	2023-04-16 08:40:53	2023-04-16 08:56:43	33-43		40	Women Stud. Int. Forum	Place: Oxford Publisher: Pergamon-Elsevier Science Ltd WOS:000326064800004	gender; sustainable development; womens status; feminism; climate change; advocacy; management; fables; interests; myths; roles; early warning system; environmental degradation; water supply
A7T8ZMTW	journalArticle	2020	Gandotra, Nikita; Agrawal, Shuchi	Sustainability, Civilization and Women-An Environmental Study of The Overstory by Richard Powers	Rupkatha Journal on Interdisciplinary Studies in Humanities	0975-2935	10.21659/rupkatha.v12n5.rioc1s10n6	The Overstory by Richard Powers is a reflection of the environmental issues gripping the human civilization once ozone depletion and global warming loomed into focus. Global warming and an intensive exploration of environmental effects on the human civilization have gained significance over time and they persist to be eminent topic of debate in both local and global context. While Emerson and Tho…	2020	2023-04-16 08:40:53	2023-04-16 08:56:48		5	12	Rupkatha J. Interdiscip. Stud. Humanit.	Place: West Bengal Publisher: Aesthetics Media Services-Aesthetixms WOS:000600059500008	Sustainability; Ecofeminism; Richard Powers; The Overstory; Trees
GGG42ZEI	journalArticle	2021	Gonzalez-Sanchez, Guadalupe; Olmo-Sanchez, Maria Isabel; Maeso-Gonzalez, Elvira	Challenges and Strategies for Post-COVID-19 Gender Equity and Sustainable Mobility	Sustainability		10.3390/su13052510	The COVID-19 pandemic has forced countries around the world to take unprecedented measures to contain it. In particular, its impact on mobility has been enormous, causing a sudden decrease in the number of trips and changes in the choice and use of modes of transport. Furthermore, the effects of this health crisis on the social and economic spheres have aggravated inequalities between population …	2021-03	2023-04-16 08:40:53	2023-04-16 08:40:53	2510	5	13	Sustainability	Place: Basel Publisher: Mdpi WOS:000628681700001	gender equity; mobility; travel; city; impact; behavior; covid-19; strategies; covid-19 lockdown; inequality; sustainable urban mobility; SWOT analysis; urban mobility
A83MSN3C	journalArticle	2021	Odrowaz-Coates, Anna	Definitions of Sustainability in the Context of Gender	Sustainability		10.3390/su13126862	The notion of sustainability is of paramount importance for long-term survival; it is also about keeping up, moving on, and not jeopardizing the future of life on earth or the future itself. It is about tangible strategies for the reproduction and long-term existence of our own species that may be supported by the mundane everyday life practices and consumer or citizen choices that are often link…	2021-06	2023-04-16 08:40:53	2023-04-16 08:40:53	6862	12	13	Sustainability	Place: Basel Publisher: Mdpi WOS:000666559000001	gender; education; human rights; leadership; environment; women; corporate social-responsibility; equality; ecofeminism; power; consumerism; CSR (Corporate Social Responsibility); exploitation; return migration; social justice
9U99UQEF	journalArticle	1995	LIEPINS, R.	WOMEN IN AGRICULTURE - ADVOCATES FOR A GENDERED SUSTAINABLE AGRICULTURE	Australian Geographer	0004-9182	10.1080/00049189508703140	A gendered consideration of rural geography has been barely discernible within Australian and New Zealand literature. The notable exceptions in this case have illustrated the complexity and merit of studying the gender patterns and relations of rural life. Outside geography, there is an expanding literature on rural women in Australia. These works parallel significant developments in the lives an…	1995-11	2023-04-16 08:40:53	2023-04-16 08:40:53	118-126	2	26	Aust. Geogr.	Place: Gladesville Publisher: Geographical Society Nsw Inc WOS:A1995TG77800005	gender; farm women; sustainable agriculture; women in agriculture
PM53KCTP	journalArticle		Shakil, Mohammad Hassan; Munim, Ziaul Haque; Zamore, Stephen; Tasnia, Mashiyat	Sustainability and financial performance of transport and logistics firms: Does board gender diversity matter?	Journal of Sustainable Finance & Investment	2043-0795	10.1080/20430795.2022.2039998	This study examines the influence of corporate environmental performance (CEP) and corporate social performance (CSP) on corporate financial performance (CFP) of transport and logistics firms. Moreover, the moderating effects of board gender diversity (BGD) on the relationship between CEP and CFP, and CSP and CFP are also investigated. We use a cross-country sample of 56 transport and logistics f…		2023-04-16 08:40:53	2023-04-16 08:40:53	2039998			J. Sustain. Financ. Invest.	Place: Abingdon Publisher: Routledge Journals, Taylor & Francis Ltd WOS:000759338800001	sustainability; environmental sustainability; women; impact; corporate social-responsibility; directors; governance; environmental performance; csr; Board gender diversity; stakeholder theory; disclosures; risk; service; social performance; upper echelon theory
LQLSL67X	journalArticle	2021	Allan, Jonathan A.	Green your groin: Sustainability, men's underwear and the wild	Critical Studies in Mens Fashion	2050-070X	10.1386/csmf_00039_1	Men and the environment, it seems, have a tenuous relationship. This article considers the challenge of men's underwear and sustainability by focusing on advertisements designed to sell ecologically friendly underwear. One of the challenges that I highlight is how we are to 'read' these advertisements. This article takes it as a given that images are polysemous. Drawing on queer theory, I propose…	2021-10-01	2023-04-16 08:40:53	2023-04-16 08:40:53	167-183	1-2	8	Crit. Stud. Mens Fash.	Place: Bristol Publisher: Intellect Ltd WOS:000732811200013	sustainability; environment; masculinity; critical theory; eco-friendly; marketing; masculinities; underwear
PNHKZVR6	journalArticle	2020	Glazebrook, Tricia; Opoku, Emmanuela	Gender and Sustainability: Learning from Women's Farming in Africa	Sustainability		10.3390/su122410483	Africa was the only continent not to achieve the 2015 Millennium Development Goal of 50% poverty reduction. This paper asks whether Africa will fare better in meeting Sustainable Development Goals (SDGs) addressing poverty and hunger by 2030. To answer this question, we examine a diverse body of literature and provide relevant longitudinal data collected over 13 years of field research. We find t…	2020-12	2023-04-16 08:40:53	2023-04-16 08:40:53	10483	24	12	Sustainability	Place: Basel Publisher: Mdpi WOS:000603193000001	sustainability; Africa; climate change; food security; climate; agriculture; capital economics; care labor; ecosystem services; Ghana; logics; practices; Sustainable Development Goals; women and gender
98SKYSWV	journalArticle	2015	Zimmerer, Karl S.; Carney, Judith A.; Vanek, Steven J.	Sustainable smallholder intensification in global change? Pivotal spatial interactions, gendered livelihoods, and agrobiodiversity	Current Opinion in Environmental Sustainability	1877-3435	10.1016/j.cosust.2015.03.004	Sustainable intensification (SI) and ecological intensification (EI) are promoted globally to strengthen food security and ensure environmental sustainability. Recent focus on land and agri-food systems of smallholders urges we address SI and EI through rethinking crucial social-ecological processes and spatial patterns. Principal findings underscore: firstly, the dynamics of differentiated, rela…	2015-06	2023-04-16 08:40:53	2023-04-16 08:40:53	49-60		14	Curr. Opin. Environ. Sustain.	Place: Oxford Publisher: Elsevier Sci Ltd WOS:000366330500007
YPQNP3FY	journalArticle	2014	Cela, Blerta; Dankelman, Irene; Stern, Jeffrey	Powerful Synergies: Gender Equality, Economic Development and Environmental Sustainability	Reproductive Health Matters	0968-8080	10.1016/S0968-8080(14)43771-6		2014-05	2023-04-16 08:40:53	2023-04-16 08:40:53	197-199	43	22	Reprod. Health Matters	Place: Amsterdam Publisher: Elsevier Science Bv WOS:000338391800022
K4H9SPUN	journalArticle	2020	Zuk, Piotr; Paczesniak, Anna	Sustainable Development, Energy Transition, and Climate Challenges in the Context of Gender: The Framework of Gender Determinants of Environmental Orientation in Poland	Sustainability		10.3390/su12219214	How does gender affect attitudes towards ecology? This question is of particular interest in a society where conservative and populist power elites perceive the concepts of "gender" and "ecology" as manifestations of "foreign" cultural influences. In turn, the dependence of the Polish energy system on coal forces us to look for various social factors that may support energy transition and the pri…	2020-11	2023-04-16 08:40:53	2023-04-16 08:56:52	9214	21	12	Sustainability	Place: Basel Publisher: Mdpi WOS:000593574000001	sustainability; gender; sustainable development; climate change; detection method; politics; ecology; attitudes; values; development; energy transition; womens; Poland [Central Europe]; public attitude
G87TMW94	journalArticle	2016	Kondylis, Florence; Mueller, Valerie; Sheriff, Glenn; Zhu, Siyao	Do Female Instructors Reduce Gender Bias in Diffusion of Sustainable Land Management Techniques? Experimental Evidence From Mozambique	World Development	0305-750X	10.1016/j.worlddev.2015.10.036	Agricultural innovation is essential to meet the food requirements of Africa's growing population. One pathway to increasing yields may be to enhance female farmer productivity. In many settings, married women cultivate plots separated from those of other family members. They face different challenges to productivity, such as deficiencies in inputs, weak property rights, and time constraints. It …	2016-02	2023-04-16 08:40:53	2023-04-16 08:40:53	436-449		78	World Dev.	Place: Oxford Publisher: Pergamon-Elsevier Science Ltd WOS:000366769900029	gender; Africa; women; attrition; conservation agriculture; experiment; extension; farmers; productivity; sustainable land management; technology
YSG4WDV3	journalArticle	2018	Jerneck, Anne	Taking gender seriously in climate change adaptation and sustainability science research: views from feminist debates and sub-Saharan small-scale agriculture	Sustainability Science	1862-4065	10.1007/s11625-017-0464-y	People, places, and production contributing the least to climate change will suffer the most. This calls for adaptation as a key climate change response. But adaptation is surrounded by problems. Finance is uncertain and fragmented, mainstreaming into development is complicated, and technical solutions often overshadow existing social relations and institutions. From a gender perspective, and as …	2018-03	2023-04-16 08:40:53	2023-04-16 08:40:53	403-416	2	13	Sustain. Sci.	Place: Tokyo Publisher: Springer Japan Kk WOS:000426807800013	vulnerability; poverty; food security; environment; Environment; policy; Inequality; challenges; Development; Distribution; Empowerment; justice; Poverty; research agenda; resilience; womens empowerment
Q5JIYMV8	journalArticle	2019	Nhem, Sareth; Lee, Young Jin	Women's participation and the gender perspective in sustainable forestry in Cambodia: local perceptions and the context of forestry research	Forest Science and Technology	2158-0103	10.1080/21580103.2019.1595174	We analyzed local stakeholders' perceptions on women's engagement in sustainable forestry and the challenges women face. We additionally examined the publication of scientific papers on women's participation and gender perspectives in forestry research. We employed Kendall's W to examine the concordance of local peoples' assessment of the knowledge of rural women related to forestry, the major ba…	2019	2023-04-16 08:40:53	2023-05-05 11:35:12	93-110	3	15	For. Sci. Technol.	Place: Abingdon Publisher: Taylor & Francis Ltd WOS:000484243800001	gender; climate change; management; governance; policy; Women; community forestry; ecosystem services; 2 decades; conservation; forest; kampong thom province; Kendall's W; Kernel density curve; redd plus
SYQXPVJ2	journalArticle	2011	Evers, Mariele; Hofmeister, Sabine	Gender mainstreaming and participative planning for sustainable land management	Journal of Environmental Planning and Management	0964-0568	10.1080/09640568.2011.573978	This contribution outlines the potential of the category of gender in critical analyses of land use policy and the perspectives it offers for the development of conceptual strategies for sustainable land management. It illustrates gender mainstreaming in urban development approaches, thus showing the potential for enhancing the quality of planning and the reduction of land consumption. The paper …	2011	2023-04-16 08:40:53	2023-04-16 08:40:53	1315-1329	10	54	J. Environ. Plan. Manag.	Place: Abingdon Publisher: Routledge Journals, Taylor & Francis Ltd WOS:000299202400002	gender mainstreaming; participative planning; socio-technical instruments
TIHEWGKM	journalArticle	2019	Furlotti, Katia; Mazza, Tatiana; Tibiletti, Veronica; Triani, Silvia	Women in top positions on boards of directors: Gender policies disclosed in Italian sustainability reporting	Corporate Social Responsibility and Environmental Management	1535-3958	10.1002/csr.1657	Inspired by the promotion of gender balance on boards of directors of listed companies in Europe, this study seeks to understand whether the presence of women with different responsibilities is associated with gender policies disclosed in corporate social responsibility or sustainability reports. Using the data of listed companies in Italy, we find a positive association between the presence of w…	2019-02	2023-04-16 08:40:53	2023-04-16 08:40:53	57-70	1	26	Corp. Soc. Responsib. Environ. Manag.	Place: Hoboken Publisher: Wiley WOS:000456311400005	corporate social responsibility; impact; corporate social-responsibility; diversity; governance; representation; gender diversity; performance; corporate governance; women directors; gender policies; glass cliff; race; schema theory; self-schemas; social report; sustainability reporting
TAJUHL7B	journalArticle	2017	Olsson, Daniel; Gericke, Niklas	The effect of gender on students' sustainability consciousness: A nationwide Swedish study	Journal of Environmental Education	0095-8964	10.1080/00958964.2017.1310083	This study extends previous environmental education research on gender differences by investigating the gender gap between boys' and girls' sustainability consciousness. The issue of Whether the gender gap in environmental education can be identified also in sustainability education is addressed It has been suggested: that,Education for Sustainable Development (ESD) is a teaching approach that co…	2017	2023-04-16 08:40:53	2023-04-16 08:40:53	357-370	5	48	J. Environ. Educ.	Place: Abingdon Publisher: Routledge Journals, Taylor & Francis Ltd WOS:000412625700005	knowledge; education; attitudes; values; gender gap; sex; bound differences; discourses; education for sustainable development; effect studies; gap; socialization processes; sustainability consciousness
VKCFJDIK	journalArticle	2017	Kim, Eun Mee	Gender and the Sustainable Development Goals	Global Social Policy	1468-0181	10.1177/1468018117703444	The Sustainable Development Goals (SDGs) began in 2016 with great hopes that they will promote social development, economic development, and environmentally sustainable development with the motto, "Leave No One Behind" (UN 2016). In particular, SDGs' goal 5, "Achieve Gender Equality and Empower All Women and Girls" (UN 2016). However, persistently high gender gap was found in many countries aroun…	2017-08	2023-04-16 08:40:53	2023-04-16 08:40:53	239-244	2	17	Glob. Soc. Policy	Place: London Publisher: Sage Publications Ltd WOS:000405859500010	empowerment; gender; mortality; health; inequality; Sustainable Development Goals; un
I9F5KVMX	journalArticle	1998	Ulgiati, S.; Brown, M. T.	Monitoring patterns of sustainability in natural and man-made ecosystems	Ecological Modelling	0304-3800	10.1016/S0304-3800(98)00016-7	By means of a systemic analysis of the relationships among components of a system's web, the flows of energy and other resources converging to produce the output (biomass, biodiversity, assets, industrial products) can be evaluated on a common basis, i.e. the content of solar equivalent energy (hereafter, emergy; Odum, H.T., 1996. Environmental Accounting. Emergy and Environmental Decision-Making…	1998-05-01	2023-04-16 08:40:53	2023-04-16 08:40:53	23-36	1-3	108	Ecol. Model.	Place: Amsterdam Publisher: Elsevier Science Bv WOS:000074057600003	sustainability; energy; emergy; indicators
LNPVKBER	journalArticle	2022	Turner, Katherine L.; Julian Idrobo, C.; Aurelie Desmarais, Annette; Maria Peredo, Ana	Food sovereignty, gender and everyday practice: the role of Afro-Colombian women in sustaining localised food systems	Journal of Peasant Studies	0306-6150	10.1080/03066150.2020.1786812	While social and political movements are the scale of action most often identified with food sovereignty-related struggles, everyday provisioning practices are critical for sustaining the distinctiveness and relative autonomy of localised food systems. We examine gendered provisioning in a Colombian, Afro-descendent community as a case study of how food sovereignty is enacted in daily life. Women…	2022-02-23	2023-04-16 08:40:53	2023-04-16 08:40:53	402-428	2	49	J. Peasant Stud.	Place: Abingdon Publisher: Routledge Journals, Taylor & Francis Ltd WOS:000558953400001	gender; atlantic forest coast; Choco; Colombia; everyday practice; Food sovereignty; local food systems; provisioning; revolution; world march
URJV8B2Y	journalArticle	2017	Marshall, Mipsie; Ockwell, David; Byrne, Rob	Sustainable energy for all or sustainable energy for men? Gender and the construction of identity within climate technology entrepreneurship in Kenya	Progress in Development Studies	1464-9934	10.1177/1464993416688830	As international climate and development policy and funding efforts accelerate, this article articulates an urgent new research agenda aimed at redressing the existing failure of policy and research to attend to gender in relation to climate mitigation (as opposed to adaptation). Focusing on the transfer and uptake of low carbon energy technologies, including a review of the literature on women a…	2017-04	2023-04-16 08:40:53	2023-04-16 08:40:53	148-172	2	17	Prog. Dev. Stud.	Place: Thousand Oaks Publisher: Sage Publications Inc WOS:000402648200004	gender identity; Kenya; women; entrepreneurship; perceptions; basin; climate mitigation; climate technology; discourse analysis; finance; mitigation
RECNNSYM	journalArticle	2002	Buckingham-Hatfield, S.	Gender equality: A prerequisite for sustainable development	Geography	0016-7487		This article uses the ten year anniversary, of the United Nations Conference on Environment and Development marked by the World Summit on Sustainable Development in Johannesburg in August 2002 to explore ways in which women have, or have not, become more involved in environmental decision making and this involvement (for example equitable education, health care and economic status) are being met,…	2002-07	2023-04-16 08:40:53	2023-04-16 08:40:53	227-233		87	Geography	Patent Number: 3 Place: Sheffield Publisher: Geographical Assoc WOS:000176986100006
NA4LH6PN	journalArticle	2018	Yumarni, Tri; Amaratunga, Dilanthi	Gender mainstreaming as a strategy to achieve sustainable post-disaster reconstruction	Built Environment Project and Asset Management	2044-124X	10.1108/BEPAM-10-2017-0086	Purpose The purpose of this paper is to discuss policy-relevant findings regarding strategies for mainstreaming gender in achieving sustainable post-disaster reconstruction (PDR). Design/methodology/approach An exploratory case study was used to explore the implementation of gender mainstreaming strategies and the link to sustainable PDR. The Bantul and Sleman regencies of Yogyakarta province pro…	2018	2023-04-16 08:40:53	2023-04-16 08:40:53	544-556	5	8	Built Environ. Proj. Asset Manag.	Place: Bingley Publisher: Emerald Group Publishing Ltd WOS:000448529600009	Sustainable development; Gender mainstreaming; Strategy; Sustainable PDR
M5S4D86J	journalArticle	2023	Wolfram, Marc; Kienesberger, Miriam	Gender in sustainability transition studies: Concepts, blind spots and future orientations	Environmental Innovation and Societal Transitions	2210-4224	10.1016/j.eist.2022.100686	Gender is a vital factor of societal organisation and transformation, and figures prominently in global sustainability agendas. Its social construction and interaction with technological change have been studied extensively. Within the field of sustainability transition (ST) research, however, the complex roles gender plays in socio-technical change are still rarely addressed or con-ceptualised. …	2023-03	2023-04-16 08:40:53	2023-04-16 08:40:53	100686		46	Environ. Innov. Soc. Trans.	Place: Amsterdam Publisher: Elsevier WOS:000921417800001	Gender; intersectionality; innovation; feminism; politics; management; policy; power; perspective; research agenda; Behaviour; Epistemology; geographies; Socio-technical; Structure; Sustainability transition; Symbolism
DCX7YXK6	journalArticle	2021	Khalikova, Venera R.; Jin, Mushan; Chopra, Shauhrat S.	Gender in sustainability research: Inclusion, intersectionality, and patterns of knowledge production	Journal of Industrial Ecology	1088-1980	10.1111/jiec.13095	This cross-disciplinary study examines gender inclusion and intersectionality in the knowledge production of sustainability research. Building on studies of gender inclusion as essential for quality research, we develop a three-step framework that analyzes the socio-demographic profile of researchers (sustainability by whom?), key research trajectories (sustainability of what?), and beneficiaries…	2021-08	2023-04-16 08:40:53	2023-04-16 08:40:53	900-912	4	25	J. Ind. Ecol.	Place: Hoboken Publisher: Wiley WOS:000604535600001	sustainability; gender; intersectionality; women; climate-change; diversity; men; behavior; preferences; perceptions; impacts; conservation; industrial ecology; science; sustainable development goal 5 (SDG 5)
LPTC9RFS	journalArticle	2014	Franz-Balsen, Angela	Gender and (Un)Sustainability-Can Communication Solve a Conflict of Norms?	Sustainability	2071-1050	10.3390/su6041973	In theory, and even more in the practice of sustainability communications, the gender dimension of sustainability has been neglected relative to other fields of the science. The aim of this paper is to show the relevance of gender as an analytical category for research and the importance of gender competence as an indispensable skill for professional sustainability communicators. Understanding ho…	2014-04	2023-04-16 08:40:53	2023-04-16 08:40:53	1973-1991	4	6	Sustainability	Place: Basel Publisher: Mdpi Ag WOS:000334921800018	perception; gender; masculinity; gender mainstreaming; environmental concern; risk; race; femininity; gender and diversity; gender competence; sustainability communication; unsustainability
HUGB7YSZ	journalArticle	2022	Prati, Giorgia; Cazcarro, Ignacio; Hazra, Somnath	Gender dimensions of the migration, sustainability and care nexus: The case study of the Mahanadi delta, India	Current Research in Environmental Sustainability	2666-0490	10.1016/j.crsust.2021.100104	Migration and environmental change are deeply interconnected processes, intimately linked to development pathways. The gender dimension of these complex interactions is often overlooked. Yet there are profound linkages and implications. This paper focuses on the gender division of labour to investigate how migration and environmental change relate to gender equality and sustainability. The study …	2022	2023-04-16 08:40:53	2023-04-16 08:40:53	100104		4	Curr. Res. Environmental Sustainability	Place: Amsterdam Publisher: Elsevier WOS:000903662200005	Gender; Intersectionality; Climate change; adaptation; environment; community; Sustainability; climate-change; Care; collective action; Deltas; division; insights; Migration; Political ecology; remittances; reproduction; rights
3WIVAS2Q	journalArticle	2021	Lovell, Robin J.; Shennan, Carol; Thuy, Nguyen Ngoc	Sustainable and conventional intensification: how gendered livelihoods influence farming practice adoption in the Vietnamese Mekong River Delta	Environment Development and Sustainability	1387-585X	10.1007/s10668-020-00905-9	The Vietnamese Mekong River Delta emerged as a rice production giant in the 1990s. Currently, the Vietnamese government is attempting to reduce environmental impacts resulting from the triple annual rice crop regime. This article explores how gender influences farming practice adoption using household livelihood survey data from Tien Giang Province. Each farm is disaggregated into male-managed, f…	2021-05	2023-04-16 08:40:53	2023-04-16 08:40:53	7089-7116	5	23	Environ. Dev. Sustain.	Place: Dordrecht Publisher: Springer WOS:000561242700002	Gender; migration; risk; productivity; technology; agricultural intensification; agroecology; global-change; green-revolution; Mekong; rice; Rice; Southeast Asia; Sustainable intensification; Vietnam; water management
5XP4PN5E	journalArticle	2007	Blake, Joanna	Missing links: gender and education for sustainable development	International Journal of Innovation and Sustainable Development	1740-8822	10.1504/IJISD.2007.017948	Focusing on the impact of Hurricane Katrina, 2005 this paper argues for a gender-sociologically, and ecologically sensitive approach to the complex range of issues raised by environmental concerns. The correlation between gender and other themes of education for sustainable development such as class, race and geography is conceptualised within a whole-systems approach to learning. Far-reaching pe…	2007	2023-04-16 08:40:53	2023-04-16 08:40:53	414-432	3-4	2	Int. J. Innov. Sustain. Dev.	Place: Geneva Publisher: Inderscience Enterprises Ltd WOS:000437538700012	gender; class; ecology; ecofeminism; masculinities; race; education for sustainable development; holistic pedagogy; interdisciplinary
DR9NMMXH	journalArticle	2018	Graef, F.; Hernandez, L. E. A.; Koenig, H. J.; Uckert, G.; Mnimbo, M. T.	Systemising gender integration with rural stakeholders' sustainability impact assessments: A case study with three low-input upgrading strategies	Environmental Impact Assessment Review	0195-9255	10.1016/j.eiar.2017.10.004	Participatory action research across food value chains (FVC) can help stabilise the food security of subsistence farmers by implementing upgrading strategies (UPS). These strategies can be assessed ex-ante and ex-post for their potential social, ecological and economic sustainability impacts. UPS implementation, however, often entails gender-specific changes and challenges in a farmer's social li…	2018-01	2023-04-16 08:40:53	2023-04-16 08:40:53	81-89		68	Environ. Impact Assess. Rev.	Place: New York Publisher: Elsevier Science Inc WOS:000419423800009	poverty; food security; Tanzania; FoPIA; Participatory research; management; Sustainability; livelihoods; framework; environmental concerns; Food value chains; Gender, upgrading strategies; Impact assessment; methodologies; principles; resource; Rural food systems; value-chain analysis
LKZHIDZW	journalArticle	2009	Lucia Cuellar-Gomez, Olga	Gender and agricultural sustainability: case study of Colombian coffee	International Journal of Innovation and Sustainable Development	1740-8822	10.1504/IJISD.2009.028075	This paper investigates how gender-based marketing strategies for Colombian coffee have affected gender roles and the economic and social advancement of women producers. In order to meet the demands of a European roaster interested in coffee produced by women, a Colombian coffee cooperative developed a female growers' program in 2000 which has grown into an association of 344 women. The study exa…	2009	2023-04-16 08:40:53	2023-04-16 08:40:53	216-225	2-3	4	Int. J. Innov. Sustain. Dev.	Place: Geneva Publisher: Inderscience Enterprises Ltd WOS:000437542600012	gender; sustainable development; agriculture; Fair Trade
IYRHM2R7	journalArticle	2019	Pimpa, Nattavud	How mining companies promote gender equality through sustainable development?	Cogent Business & Management	2331-1975	10.1080/23311975.2019.1647590	Gender equality has been promoted among social responsibility by mining companies. A key challenge for the management of sustainable development programs for gender equality is the need to develop sophisticated approaches that work at both local and international levels. In this paper, the researcher investigates the impact of CSR programs on gender equality (through labour, environment, training…	2019-07-23	2023-04-16 08:40:53	2023-04-16 08:40:53	1647590	1	6	Cogent Bus. Manag.	Place: Oslo Publisher: Taylor & Francis As WOS:000478047200001	sustainability; mining; women; csr; gender equality; social-responsibility
GLME5QMW	journalArticle	2022	Buallay, Amina; Hamdan, Reem; Barone, Elisabetta; Hamdan, Allam	Increasing female participation on boards: Effects on sustainability reporting	International Journal of Finance & Economics	1076-9307	10.1002/ijfe.2141	Utilizing data on 2,116 stock-exchange-listed banks over a 10-year period (2007-2016), this study examines the relationship between board gender diversity and sustainable reporting. Findings from descriptive analysis show that board diversity tends to be higher with banks endowed with low financial leverage and high assets. Cross-country analysis shows that Central America evinces the highest lev…	2022-01	2023-04-16 08:40:53	2023-04-16 08:40:53	111-124	1	27	Int. J. Financ. Econ.	Place: Hoboken Publisher: Wiley WOS:000568723400001	impact; directors; governance; gender diversity; performance; board gender diversity; firm; agency; disclosure; cost; corporate; ESG disclosure by banks; sustainability reporting
DEDZKTYU	journalArticle	2021	Connor, Melanie; San, Su Su	Sustainable rice farming and its impact on rural women in Myanmar	Development in Practice	0961-4524	10.1080/09614524.2020.1787350	This article reports on a study that investigated the adoption of sustainable rice farming practices and its social and cultural impact on rural women in Myanmar through the use of semi-structured interviews. The findings show that adoption resulted in a great variety of changes, which have impacted on both a personal level and at a community level. Families use extra income to invest in farming,…	2021-01-02	2023-04-16 08:40:53	2023-04-16 08:40:53	49-58	1	31	Dev. Pract.	Place: Abingdon Publisher: Routledge Journals, Taylor & Francis Ltd WOS:000547019900001	conservation; efficiency; Environment (built and natural) - Agriculture; Food security; Gender and diversity; interventions; Labour and livelihoods - Poverty reduction; South Asia
EHVC7FHF	journalArticle	2023	Singhania, Shubham; Singh, Jagvinder; Aggrawal, Deepti	Gender diversity on board and corporate sustainability: a quantitative review based on bibliometric mapping	International Journal of System Assurance Engineering and Management	0975-6809	10.1007/s13198-022-01789-w	Gender Diversity and Corporate Sustainability are the two buzzwords that have impacted the field of research at the global level. The growing consciousness about the corporate scandals along with the dismantling environmental issues calls for an exploration. Through the lens of Stakeholders theory and Resource dependency theory we found an interlinkage between these two concepts, but the literatu…	2023-02	2023-04-16 08:40:53	2023-04-16 08:40:53	267-286	1	14	Int. J. Syst. Assur. Eng. Manag.	Place: New Delhi Publisher: Springer India WOS:000894559500001	Gender diversity; PRISMA model; Bibliometric analysis; ownership; Sustainability; women; impact; governance; environmental performance; firm; social-responsibility; disclosure; cocitation analysis; evolution; R-Studio
76ZNXV9G	journalArticle	2020	Pla-Julian, Isabel; Guevara, Sandra	Mainstreaming gender and sustainability jointly: a case study from a local government in Spain	Local Environment	1354-9839	10.1080/13549839.2020.1732314	After the approval of the Sustainable Development Goals in 2015, mainstreaming has regained attention as a key strategy to advance towards sustainable development (SD). Taking into account the multidimensionality of this societal aspiration and the indivisible nature of the agenda, the United Nations has developed a strategy encompassing mainstreaming, acceleration and policy support (the UN MAPS…	2020-03-03	2023-04-16 08:40:53	2023-04-16 08:40:53		3	25	Local Environ.	Place: Abingdon Publisher: Routledge Journals, Taylor & Francis Ltd WOS:000517676300004	Sustainable development; empowerment; intersectionality; gender mainstreaming; perspective; challenges; governance for sustainability; institutional change; key; policy-making; systems; transformative strategies
FUXBE4UE	journalArticle	2013	Najjar, Dina; Spaling, Harry; Sinclair, A. John	Learning about sustainability and gender through Farmer Field Schools in the Taita Hills, Kenya	International Journal of Educational Development	0738-0593	10.1016/j.ijedudev.2012.06.004	This research uses transformative learning theory to explore how Farmers Field Schools (FFS) of the Taita Hills, Kenya have contributed to environmental sustainability, with a particular focus on gendered learning. Both genders experienced transformations in their meaning schemes related to farming (e.g., men and women switched their traditional roles in tillage and planting). A significant chang…	2013-09	2023-04-16 08:40:53	2023-04-16 08:40:53	466-475	5	33	Int. J. Educ. Dev.	Place: Oxford Publisher: Pergamon-Elsevier Science Ltd WOS:000323293900007	Gender; Kenya; Taita Hills; impact; extension; environmental assessment; exploring diversity; Farmers Field Schools; participatory resource-management; smallholder farmers; soil fertility management; Transformative learning; western kenya
PA9MMT66	journalArticle	2017	Bahta, Yonas T.; Strydom, Dirk B.; Donkor, Emmanuel	Microcredit and gender empowerment: policy implications for sustainable agricultural development in Eritrea	Development in Practice	0961-4524	10.1080/09614524.2017.1259393	Sustainable agricultural development requires capital investment. However, farmers in Africa are constrained by inadequate access to microcredit. Therefore, this article examines the extent to which gender influences access to microcredit. The empirical results showed that women are less likely to be able to access microcredit, compared to men. The study also found that separate sets of factors i…	2017	2023-04-16 08:40:53	2023-04-16 08:40:53	90-102	1	27	Dev. Pract.	Place: Abingdon Publisher: Routledge Journals, Taylor & Francis Ltd WOS:000390930800009	sub-Saharan Africa; Environment (built and natural) - Agriculture; Gender and diversity; Labour and livelihoods - Microfinance
HETISW6M	journalArticle	2022	Leuenberger, Deniz Zeynep; Lutte, Rebecca	Sustainability, Gender Equity, and Air Transport: Planning a Stronger Future	Public Works Management & Policy	1087-724X	10.1177/1087724X221075044	In 2015, the United Nations member states unanimously adopted 17 Sustainable Development Goals as a part the Agenda for Sustainable Development, with a target completion date of 2030. Of these, (9) Industry Innovation and Infrastructure, (12) Responsible Production and Consumption, and (13) Climate Change have direct links to transportation and to aviation. One goal, (5) Gender Equality has espec…	2022-07	2023-04-16 08:40:53	2023-04-16 08:40:53	238-251	3	27	Public Works Manag. Policy	Place: Thousand Oaks Publisher: Sage Publications Inc WOS:000772788300001	sustainability; gender equity; air transport; aviation issues; workforce
8VV75PQB	journalArticle	2022	Ma, Zhong; Shu, Guang; Wang, Qi; Wang, Longfeng	Sustainable Governance and Green Innovation: A Perspective from Gender Diversity in China's Listed Companies	Sustainability		10.3390/su14116403	Sustainable governance has become essential in corporate sustainable development. As female executives bring diversity to corporate governance, their impact on the corporate sustainability has attracted wide attention. Using the evidence from China's listed companies in Shanghai and Shenzhen A-shares between 2010 and 2019, this paper examines the impact of gender diversity of executives on corpor…	2022-06	2023-04-16 08:40:53	2023-04-16 08:40:53	6403	11	14	Sustainability	Place: Basel Publisher: Mdpi WOS:000809193600001	management; women; directors; gender diversity; performance; green innovation; strategy; technology; board; corporate environmentalism; female executives; industry; managerial perceptions; patriarchy culture; sustainable governance
HD8CM588	journalArticle	2013	Organo, Vanessa; Head, Lesley; Waitt, Gordon	Who does the work in sustainable households? A time and gender analysis in New South Wales, Australia	Gender Place and Culture	0966-369X	10.1080/0966369X.2012.716401	Households in the affluent West have become an important target of government and NGO campaigns to encourage more environmentally sustainable behaviours, but there has been little research into the gender implications of such policies. This article investigates the role of gender and time in the sustainability practices of six heterosexual households with young children, committed participants in…	2013-08-01	2023-04-16 08:40:53	2023-04-16 08:40:53	559-577	5	20	Gend. Place Cult.	Place: Abingdon Publisher: Routledge Journals, Taylor & Francis Ltd WOS:000323475100001	sustainability; climate change; climate-change; geographies; home; domestic labour; identity; New South Wales; temporality
DNFNWQB5	journalArticle	2021	Arachchi, Janaki Imbulana; Managi, Shunsuke	Preferences for energy sustainability: Different effects of gender on knowledge and importance	Renewable & Sustainable Energy Reviews	1364-0321	10.1016/j.rser.2021.110767	There is increasing interest in investigating sustainable energy to mitigate carbon dioxide emissions and promote energy sustainability. We contribute to the existing literature by examining people?s? knowledge of energy sustainability and concerns about the importance of energy sustainability. Therefore, we investigate the linkage between self-reported knowledge and concerns about energy sustain…	2021-05	2023-04-16 08:40:53	2023-04-16 08:40:53	110767		141	Renew. Sust. Energ. Rev.	Place: Oxford Publisher: Pergamon-Elsevier Science Ltd WOS:000632278600001	Cause-effect logic; Energy sustainability; Importance; Knowledge; Gender difference; Holistic associations
2DAC4PYD	journalArticle	2021	Jirakiattikul, Sopin; Lan, Tran Thi; Techato, Kuaanan	Advancing Households' Sustainable Energy through Gender Attitudes towards Rooftop PV Installations: A Case of the Central Highlands, Vietnam	Sustainability		10.3390/su13020942	The report shows that there was no disparity between males and females in their attitude to rooftop solar electricity systems (rooftop PV) installations. Government motivation is the key factor that affects householders' attitudes to rooftop PV. Three other factors-households' perception, education and environment mentioning-were also crucial for the research model. Meanwhile, six factors had no …	2021-01	2023-04-16 08:40:53	2023-04-16 08:40:53	942	2	13	Sustainability	Place: Basel Publisher: Mdpi WOS:000611764100001	Vietnam; central highlands; gender attitude; rooftop PV; sustainable energy
XZ5LBT8V	journalArticle		Leal Filho, Walter; Kovaleva, Marina; Tsani, Stella; Tirca, Diana-Mihaela; Shiel, Chris; Dinis, Maria Alzira Pimenta; Nicolau, Melanie; Sima, Mihaela; Fritzen, Barbara; Salvia, Amanda Lange; Minhas, Aprajita; Kozlova, Valerija; Doni, Federica; Spiteri, Jane; Gupta, Tanushka; Wakunuma, Kutoma; Sharma, Mohit; Barbir, Jelena; Shulla, Kalterina; Bhandari, Medani P.; Tripathi, Shiv	Promoting gender equality across the sustainable development goals	Environment Development and Sustainability	1387-585X	10.1007/s10668-022-02656-1	Gender issues, and gender equality in particular, can be regarded as cross-cutting issues in the implementation of the Sustainable Development Goals (SDGs), even though it is unclear how they are taken into account. This study addresses this information gap by performing an assessment of the emphasis on gender issues across all the other 16 SDGs, in addition to SDG5, through a literature review a…		2023-04-16 08:40:53	2023-04-16 08:40:53				Environ. Dev. Sustain.	Place: Dordrecht Publisher: Springer WOS:000854705200001	impact; governance; Gender equality; inequality; trade-offs; economic-growth; Gender across SDGs; sdg5; sdgs; Sustainable development goals (SDGs)
X58EFD9X	journalArticle	2012	Rudaz, Gilles; Debarbieux, Bernard	'Mountain women': silent contributors to the global agenda for sustainable mountain development	Gender Place and Culture	0966-369X	10.1080/0966369X.2011.625084	In this article, we examine the transnational and international discourses and initiatives focused on and/or carried out by the so-called 'mountain women.' Tracking the growing reference to 'mountain women', we analyze the way in which the construction and the claim of a gendered identity has developed within the general debate on the international recognition of the global importance of mountain…	2012	2023-04-16 08:40:53	2023-04-16 08:40:53	615-634	5	19	Gend. Place Cult.	Place: Abingdon Publisher: Routledge Journals, Taylor & Francis Ltd WOS:000309277300004	gender; sustainable development; intersectionality; work; community; identity; global; mountain women; mountains
MFETPPBL	journalArticle	2015	Tanski, Marek	Joseph Kozielecki's Concept of Transgressive Man and the Problems of Sustainable Development	Problemy Ekorozwoju	1895-6912		In this article the author notes, that the development according to Joseph Kozielecki depends on the fact, that man transcends natural, symbolic, social borders, associated with his own inner world, in order to satisfy own needs. He aims to improve the quality of life, and also tries to preserve the natural environment in possibly best condition. This understanding of the concept of development a…	2015	2023-04-16 08:40:53	2023-04-16 08:40:53	61-66	1	10	Probl. Ekorozw.	Place: Lublin Publisher: Politechnika Lubelska WOS:000350392700008	sustainable development; hubristic need; know thyself; transgression; value of dignity
NDRKXXBZ	journalArticle	2020	Kerras, Hayet; Luis Sanchez-Navarro, Jorge; Isidro Lopez-Becerra, Erasmo; de-Miguel Gomez, Maria Dolores	The Impact of the Gender Digital Divide on Sustainable Development: Comparative Analysis between the European Union and the Maghreb	Sustainability		10.3390/su12083347	Today, the relationship between gender and information and communications technologies (ICTs) is a very important element in achieving sustainable development, since ICTs play a key role in attaining gender equality and empowering women by allowing access to important information and involving them as actors in social, economic and environmental development. This participation is closely linked t…	2020-04	2023-04-16 08:40:53	2023-04-16 08:40:53	3347	8	12	Sustainability	Place: Basel Publisher: Mdpi WOS:000535598700280	culture; environment; equality; information; sustainable development goals; gender digital divide; information and communication technologies
SY8HXQED	journalArticle	2019	Davies, Olivia; Riach, Kathleen	From manstream measuring to multispecies sustainability? A gendered reading of bee-ing sustainable	Gender Work and Organization	0968-6673	10.1111/gwao.12245	This article draws on an ethnography of bee-work to explore how androcentrism is enacted and disrupted in environmental organizing practices. We first situate the study in recent debates surrounding sustainability, viewing this as one organizing project that informs the recent 'Save the Bees' discourse and initiatives proliferating the global North. Theoretically inspired by ideas from political …	2019-05	2023-04-16 08:40:53	2023-04-16 08:40:53	246-266	3	26	Gend. Work. Organ.	Place: Hoboken Publisher: Wiley WOS:000465603700002	sustainability; corporate; animals; animals at work; apiculture; bees; companion species; ecofeminist; multispecies ethnography; new materialisms
TUCSUYER	journalArticle	2021	Atan, Arzu; Ozgit, Hale; Silman, Fatos	Happiness at Work and Motivation for a Sustainable Workforce: Evidence from Female Hotel Employees	Sustainability		10.3390/su13147778	Employment practices that support happiness at work are critical tools for developing a sustainable workforce. In today's challenging environment, both economically and environmentally, the contribution of a sustainable workforce, which is the most critical asset for hospitality businesses to survive and succeed, cannot be ignored. This study explores the effects of motivational dimensions on hap…	2021-07	2023-04-16 08:40:53	2023-04-16 08:40:53	7778	14	13	Sustainability	Place: Basel Publisher: Mdpi WOS:000676906400001	gender; motivation; health; women; engagement; support; achievement; happiness at work; hospitality; hospitality employees; intrinsic motivation; job-satisfaction; positive psychology; sustainable workforce; well
SJTD65ZT	journalArticle	2021	Radclyffe-Thomas, Natascha	Sustainable development and the aspirational male consumer: Tengri, making the case for sustainable luxury	Critical Studies in Mens Fashion	2050-070X	10.1386/csmf_00043_1	Luxury is an industry that defines its value through the quality of its raw materials, which fosters creativity, elevates artisanship and relies on brand heritage and local production to underpin the provenance of its products and justify its pricing strategy and, as such, can be considered as embodying many of the practices of sustainability. Yet, despite public commitments and pledges for bette…	2021-10-01	2023-04-16 08:40:53	2023-04-16 08:40:53	245-266	1-2	8	Crit. Stud. Mens Fash.	Place: Bristol Publisher: Intellect Ltd WOS:000732811200017	sustainability; innovation; sustainable; development; fashion; luxury; social enterprise
4T639B4B	journalArticle	2019	Moelders, Tanja	Rethinking gender: feminist perspectives on Sustainable Development Goals in the light of (re) productivity	Gaia-Ecological Perspectives for Science and Society	0940-5550	10.14512/gaia.28.2.6	Gender equality is a Sustainable Development Goal (SDG) and at the same time is recognised as a cross-sectional perspective for all SDGs. Despite this commitment, the SDGs risk reinforcing a women-oriented sustainability discourse. First, there is a danger of feminising environmental responsibility, which at the same time strengthens the assumption of a heteronormative normality. Second, feminist…	2019	2023-04-16 08:40:53	2023-04-16 08:40:53	95-99	2	28	GAIA	Place: Munich Publisher: Oekom Verlag Gmbh WOS:000471198200005	sustainability; gender; Sustainable Development Goals; (re) productivity; feminist economics; nature
WQXGGR5R	journalArticle	2020	DiPrete Brown, Lori; Atapattu, Sumudu; Stull, Valerie Jo; Calderon, Claudia Irene; Huambachano, Mariaelena; Houenou, Marie Josee Paula; Snider, Anna; Monzon, Andrea	From a Three-Legged Stool to a Three-Dimensional World: Integrating Rights, Gender and Indigenous Knowledge into Sustainability Practice and Law	Sustainability		10.3390/su12229521	"Sustainable Development" has come a long way since the World Commission on Environment and Development first popularized the term in 1987. Virtually everyone is now familiar with the term Sustainable Development, from states to multinational corporations, and from affluent communities in the Global North to impoverished communities in the Global South. It received a new lease of life in 2015 whe…	2020-11	2023-04-16 08:40:53	2023-04-16 08:40:53	9521	22	12	Sustainability	Place: Basel Publisher: Mdpi WOS:000594612100001	gender equity; sustainable development; human rights; sustainable development goals; agroecology; de-growth; food sovereignty; human health; local and Indigenous knowledge; planetary health
NEWHCEW3	journalArticle	1997	Armitage, D. R.; Hyma, B.	Sustainable community-based forestry development: A policy and programme framework to enhance women's participation	Singapore Journal of Tropical Geography	0129-7619	10.1111/1467-9493.00002	Conventional development theory and practice have often failed to recognise the centrality of women in sustainable resource management A conceptual shift in environment and resource policies, planning and programmes is required to affirm that women are active participants rather than passive recipients of change. To address the need for enhanced women's participation in community-based forestry d…	1997-06	2023-04-16 08:40:53	2023-04-16 08:40:53	1-19	1	18	Singap. J. Trop. Geogr.	Place: Oxford Publisher: Blackwell Publ Ltd WOS:A1997XN91600001	gender; india; trees
3C7LW3SL	journalArticle	2020	Fosado Centeno, Ericka	The Socio-Political Construction of Climate Change: Looking for Paths to Sustainability and Gender Justice	Sustainability		10.3390/su12083382	With the purpose of getting to know the cultural and socio-political mechanisms that shape the climate agenda, this study follows a discourse analysis method and a gender perspective, for which an analytical basis is proposed to identify the cognitive, normative, and symbolic components that give meaning and substance to climate policy. Examining the productions of international organizations res…	2020-04	2023-04-16 08:40:53	2023-04-16 08:40:53	3382	8	12	Sustainability	Place: Basel Publisher: Mdpi WOS:000535598700315	sustainability; climate change; justice; discourse analysis; science; gender analysis
AVZZIYIX	journalArticle	2009	Chen, Xiangqiao; Wu, Jianguo	Sustainable landscape architecture: implications of the Chinese philosophy of "unity of man with nature" and beyond	Landscape Ecology	0921-2973	10.1007/s10980-009-9350-z	As the world population continues to grow and as global urbanization continues to unfold, our ecosystems and landscapes will be increasingly domesticated and designed. Developing and maintaining sustainable landscapes have become one of the most challenging and imperative tasks for scientists and stakeholders of all sorts. To accomplish this task, landscape ecology and landscape architecture can …	2009-10	2023-04-16 08:40:53	2023-04-16 08:40:53	1015-1026	8	24	Landsc. Ecol.	Place: Dordrecht Publisher: Springer WOS:000269913600003	China; Sustainability; ecology; future; science; systems; Human-nature relationship; Landscape architecture; Landscape design and planning; scales; Unity of man with nature
W2D6N9H6	journalArticle	2022	Al-Qahtani, Muneera; Zguir, Mariem Fekih; Ari, Ibrahim; Koc, Muammer	Female Entrepreneurship for Sustainable Economy and Development-Challenges, Drivers, and Suggested Policies for Resource-Rich Countries	Sustainability		10.3390/su142013412	Female entrepreneurship plays a critical role in achieving economic diversification, sustainable economy, and sustainable development, not only in economic terms but also in social and environmental dimensions. Women are considered excellent and relentless custodians of their families, their surroundings, and society. However, in many countries, particularly in resource-rich and developing states…	2022-10	2023-04-16 08:40:53	2023-04-16 08:40:53	13412	20	14	Sustainability	Place: Basel Publisher: Mdpi WOS:000873699000001	sustainability; gender equity; gender; investment; women; entrepreneurship; behavior; cultural barriers; economic diversification; networking; women empowerment
P2RSY3JL	journalArticle	1994	BYERS, E.; SAINJU, M.	MOUNTAIN ECOSYSTEMS AND WOMEN - OPPORTUNITIES FOR SUSTAINABLE DEVELOPMENT AND CONSERVATION	Mountain Research and Development	0276-4741	10.2307/3673773	This paper provides an overview of mountain environmental problems and the role of women in conserving the mountain resource base. There is a remarkable convergence of policy objectives between the themes of sustainable development, environmental conservation, and the advancement of women. These issues are discussed and constraints and opportunities are enumerated. While both mountains and women …	1994-08	2023-04-16 08:40:53	2023-04-16 08:40:53	213-228	3	14	Mt. Res. Dev.	Place: Berkeley Publisher: Univ Calif Press WOS:A1994PC75500003
I3UHFZ9B	journalArticle	2011	Mwangi, Esther; Meinzen-Dick, Ruth; Sun, Yan	Gender and Sustainable Forest Management in East Africa and Latin America	Ecology and Society	1708-3087		This paper presents a comparative study of forest management across four countries in East Africa and Latin America: Kenya, Uganda, Bolivia, and Mexico. It focuses on one question: Do varying proportions of women (low, mixed, high) in forest user groups influence their likelihood of adopting forest resource enhancing behavior? We found that higher proportions of females in user groups, and especi…	2011	2023-04-16 08:40:53	2023-04-16 08:40:53	17	1	16	Ecol. Soc.	Place: Wolfville Publisher: Resilience Alliance WOS:000289081200028	sustainability; gender; equity; resource management; participation; women; governance; community forestry; rights; forest management; land; social forestry; user groups
YCE9H2PW	journalArticle	2023	Sagaris, Lake; Tiznado-Aitken, Ignacio	New horizons for sustainable transport planning: An analysis of seven years of gender-related research in Chile	Journal of Transport & Health	2214-1405	10.1016/j.jth.2022.101544	Introduction: Understanding of social sustainability has deepened as concepts of transport justice, mobility and access highlight the importance of health, safety, security, but also human agency, rights and civic competence as strategic within the social determinants of health. Gender helps to assess progress towards social justice. How can transport systems correct, offset, or adequately respon…	2023-01	2023-04-16 08:40:53	2023-04-16 08:40:53	101544		28	J. Transp. Health	Place: Oxford Publisher: Elsevier Sci Ltd WOS:000908428200004	Gender; poverty; mobility; women; urban; Equity; Women; time; justice; benefits; health equity; lessons; Safety; santiago; Security; Sustainable transport planning
SVWR3AMD	journalArticle	2020	Akhter, Jesmin; Cheng, Kun	Sustainable Empowerment Initiatives among Rural Women through Microcredit Borrowings in Bangladesh	Sustainability		10.3390/su12062275	Microcredit is an effective instrument that has been recognized to alleviate poverty, especially in developing countries such as Bangladesh. This study seeks to use microcredit as an instrument to bridge the gap between the accessibility of microcredit among poor rural women and sustainable socio-economic development, providing novelty to the concept of "sustainability of empowerment". In additio…	2020-03-02	2023-04-16 08:40:53	2023-04-16 08:40:53	2275	6	12	Sustainability	Place: Basel Publisher: Mdpi WOS:000523751400122	sustainable development; microfinance; impact; accessibility; women empowerment; credit programs; impact assessment; micro-finance; microcredit; reduce poverty
VY8XEU85	journalArticle	2022	Bananuka, Juma; Nkundabanyanga, Stephen Korutaro; Kaawaase, Twaha Kigongo; Mindra, Rachel Katoroogo; Kayongo, Isaac Newton	Sustainability performance disclosures: the impact of gender diversity and intellectual capital on GRI standards compliance in Uganda	Journal of Accounting in Emerging Economies	2042-1168	10.1108/JAEE-09-2021-0301	Purpose The purpose of this study is to examine the extent and impact of gender diversity and intellectual capital on compliance with Global Reporting Initiative (GRI) sustainability reporting standards by Uganda manufacturing companies. Design/methodology/approach Data were collected from manufacturing firms in Uganda using a questionnaire survey to find out their perception of compliance with t…	2022-09-22	2023-04-16 08:40:53	2023-04-16 08:40:53	840-881	5	12	J. Account. Emerg. Econ.	Place: Bingley Publisher: Emerald Group Publishing Ltd WOS:000751062300001	Uganda; management; governance; determinants; quality; market; gas; Board gender diversity; drivers; Global reporting initiative; GRI sustainability Reporting standards; Intellectual capital; models; reporting evidence; Sustainability performance disclosures; variables
GTYFTZIA	journalArticle	2012	Belwal, Rakesh; Tamiru, Misrak; Singh, Gurmeet	Microfinance and sustained economic improvement: Women small-scale entrepreneurs in Ethiopia	Journal of International Development	0954-1748	10.1002/jid.1782	Women entrepreneurs account for a sizable majority of small-scale entrepreneurs in Africa. A minor change in their capitalization could assure their participation in diverse productive activities and has a large impact on their lives and families, as well as on the economy. While their access to credit is impeded profoundly because of the regulatory constraints imposed by formal financial institu…	2012-01	2023-04-16 08:40:53	2023-04-16 08:40:53	S84-S99		24	J. Int. Dev.	Place: Malden Publisher: Wiley-Blackwell WOS:000298881000006	Ethiopia; microfinance; Africa; women Entrepreneurs
DBYSZDHF	journalArticle	2022	Lawson, Lynda; Chowdhury, Arnab Roy	Women in Thailand's gem and jewellery industry and the Sustainable Development Goals (SDGs): Empowerment or continued inequity?	Environmental Science & Policy	1462-9011	10.1016/j.envsci.2022.07.018	Thailand is a worldwide hub for the value addition of gemstones. Women in Thailand enjoy a high level of education, their employment level is on par with other member states of the Association of Southeast Asian Nations (ASEAN) and they play a significant role in the gem and jewellery industry. Thai institutions support the industry, but their gender-neutral stance does not celebrate, or capitali…	2022-10	2023-04-16 08:40:53	2023-04-16 08:40:53	675-684		136	Environ. Sci. Policy	Place: Oxford Publisher: Elsevier Sci Ltd WOS:000860763400008	Gender; gender; growth; SDGs; Gem and jewellery; scale; Thailand
DIG3LCB6	journalArticle	2021	Al-Garawi, Najah; Anil, Ismail	Geographical Distribution and Modeling of the Impact of Women Driving Cars on the Sustainable Development of Saudi Arabia	Sustainability		10.3390/su13179941	Background: This work investigated attitudes and public perception regarding the impact of allowing women to drive on social, environmental, and economic aspects of the sustainable development in the Kingdom of Saudi Arabia (KSA). The study includes the perspectives of both women and men towards the potential implications of this decree on society in general and women's well-being in particular. …	2021-09	2023-04-16 08:40:53	2023-04-16 08:40:53	9941	17	13	Sustainability	Place: Basel Publisher: Mdpi WOS:000695601600001	sustainability; gender; statistical analysis; behavior; drivers; geographical distribution; modeling; women driving
X4GW5VVL	journalArticle	2022	Fan, Mingyue; Khalique, Abdul; Qalati, Sikandar Ali; Gillal, Faheem Gul; Gillal, Rukhsana Gul	Antecedents of sustainable e-waste disposal behavior: the moderating role of gender	Environmental Science and Pollution Research	0944-1344	10.1007/s11356-021-17275-y	This study presents an integrative sustainable e-waste model, drawing on organismic integration theory and gender schema theory. E-waste behavior has attracted considerable attention in the cleaner production literature in recent years. However, there is growing debate, and little research has been conducted in developing countries, especially Pakistan, to investigate the motivational factors inf…	2022-03	2023-04-16 08:40:53	2023-04-16 08:40:53	20878-20891	14	29	Environ. Sci. Pollut. Res.	Place: Heidelberg Publisher: Springer Heidelberg WOS:000715013900001	china; determinants; impacts; schema theory; intrinsic motivation; collection; couple; electronic waste; Gender schema theory; Habit; Motivational regulations; Organismic integration theory; recycling behavior; Sustainable e-waste disposal behavior
HNKABXHP	journalArticle	1997	Tsegaye, B.	The significance of biodiversity for sustaining agricultural production and role of women in the traditional sector: The Ethiopian experience	Agriculture Ecosystems & Environment	0167-8809	10.1016/S0167-8809(96)01134-6	Ethiopia is known as a center of diversity hosting various flora and fauna. Traditional farmers living in the country's highly varied agro-ecological zones have developed various farming systems that are characterized by the high degree of inter- and intra-specific crop diversity across space and time. A wide range of crop diversity has been maintained by traditional farming societies in a sustai…	1997-04	2023-04-16 08:40:53	2023-04-16 08:40:53	215-227	2-3	62	Agric. Ecosyst. Environ.	Place: Amsterdam Publisher: Elsevier Science Bv WOS:A1997XG80300012	sustainability; crop diversity; landraces; traditional farming; women and genetic diversity
A923IKAW	journalArticle	2021	Broto, Olga; Puig-Denia, Alba; Lapiedra, Rafael	How to Enhance Sustainability through Technology Usage: An Analysis of Managerial Capabilities and Gender in the Tourism Sector	Sustainability		10.3390/su132313398	New technologies are enabling not only ever-increasing levels of production efficiency but also socially and environmentally sustainable development. Although sustainability is a multi-disciplinary and multi-sectoral concept, many studies have shown that technology is a significant component. However, both sustainability and the impact of technology use on sustainability ultimately depend on one …	2021-12	2023-04-16 08:40:53	2023-04-16 08:40:53	13398	23	13	Sustainability	Place: Basel Publisher: Mdpi WOS:000735130000001	sustainability; gender; management; women; social sustainability; boards; performance; technology; competitive advantage; computer self-efficacy; dynamic capabilities; information-technology; managerial capabilities; user acceptance
2IX3U8H8	journalArticle	2018	Aluko, Yetunde A.; Okuwa, Oluwakemi B.	Innovative solutions and women empowerment: Implications for sustainable development goals in Nigeria	African Journal of Science Technology Innovation & Development	2042-1338	10.1080/20421338.2018.1471028	This paper presents an analysis of patterns of university interaction for innovation that engenders inclusive development in Nigeria. Specifically, it explains innovative solutions for women empowerment that occurred through interaction between the University of Ibadan and the Ile-Ogbo community and its implication for sustainable development goals. It is a case of innovation and skills upgrading…	2018	2023-04-16 08:40:53	2023-04-16 08:40:53	441-449	4	10	Afr. J. Sci. Technol. Innov. Dev.	Place: Abingdon Publisher: Taylor & Francis Ltd WOS:000438096100006	sustainable development; innovation; inclusive development; university interaction; women empowerment
FHXCACPE	journalArticle	1998	Siar, S. V.; Caneba, L. M.	Women and the question of sustainable development in a Philippine fishing village	International Journal of Sustainable Development and World Ecology	1350-4509	10.1080/13504509809469969	This paper presents a case study of time use and contribution to the household income of men, women, and children in 12 households in a fishing village in Panay Island, central Philippines. The study highlights the differential impact of poverty on men and women and provides a glimpse of the intrahousehold dynamics within poor fishing households. Findings in previous studies in both industrialize…	1998-03	2023-04-16 08:40:53	2023-04-16 08:40:53	51-58	1	5	Int. J. Sustain. Dev. World Ecol.	Place: Philadelphia Publisher: Taylor & Francis Inc WOS:000074286000005	sustainable development; poverty; women; fishery resources; time use
6KJJGH3N	journalArticle	2019	Powell, Maud; Fery, Melissa; Agenbroad, Ariel; Guzy, Michael	Personal Connections: What Women in Sustainable Agriculture Value in Their Professional Development	Journal of Extension	0022-0140		We designed a national sustainable agriculture conference for women farmers and agricultural professionals to provide a supportive environment in which participants felt comfortable to learn, share, contribute, question, network, and make connections affecting their personal and professional lives. Through postconference and later retrospective evaluations, we identified key concepts that Extensi…	2019-10	2023-04-16 08:40:53	2023-04-16 08:40:53	5FEA5	5	57	J. Ext.	Place: Madison Publisher: Univ of Wisconsin Extension Journal Inc WOS:000490765800005	engaging women farmers; Extension conferences for women; professional development for women; women in sustainable agriculture
L9QCE6ST	journalArticle	2012	Rad, Sevgi; Ates, Hacer Celik; Delioglan, Sanser; Polatoz, Sefa; Ozcomlekci, Gulay	Participation of rural women in sustainable development - demographical and socio-economic determinants	Sustainable Development	0968-0802	10.1002/sd.451	Empowering women is a top priority in the pre-accession process that is going on between the EU and Turkey. The accession partnership with the EU calls for identification of the challenges women face and specific priorities to promote the role of women in society. A gender-based disadvantageous socio-economic situation is more critical in rural communities. In this sense, studying, analyzing and …	2012-04	2023-04-16 08:40:53	2023-04-16 08:40:53	71-84	2	20	Sustain. Dev.	Place: Hoboken Publisher: Wiley WOS:000301646300001	sustainable development; Turkey; attitudes; rural women; economies; gender-roles; Mersin; socio-economic
HV9UKM3V	journalArticle	2020	Carballo-Penela, Adolfo; Ruzo-Sanmartin, Emilio; Sousa, Carlos M. P.	Influence of Business Commitment to Sustainability, Perceived Value Fit, and Gender in Job Seekers' Pursuit Intentions: A Cross-Country Moderated Mediation Analysis	Sustainability		10.3390/su12114395	Recruitment messages can help organizations to attract talent by influencing job seekers perceived fit with the company. As sustainability issues have become more relevant for 21st century citizens, messages communicating companies' commitment to sustainability can send information that could influence young job seekers perceived fit with their future organizations. This between-subjects study an…	2020-06	2023-04-16 08:40:53	2023-04-16 08:40:53	4395	11	12	Sustainability	Place: Basel Publisher: Mdpi WOS:000543391800058	gender; culture; social sustainability; diversity; perceptions; environmental sustainability; corporate sustainability; attractiveness; between-subjects; corporate social performance; decisions; experimental design; human-resource management; job pursuit intentions; job seekers; mechanisms; person-organization fit; recruitment; recruitment messages
29CRXURR	journalArticle	2020	Shrestha, Bindu; Bajracharya, Sushil B.; Keitsch, Martina M.; Tiwari, Sudarshan R.	Gender differences in household energy decision-making and impacts in energy saving to achieve sustainability: A case of Kathmandu	Sustainable Development	0968-0802	10.1002/sd.2055	Electrical appliances use increased in the households of Kathmandu city for the last three decades. The use and purchase of appliances have a significant contribution to household energy-saving behavior. This study examines gender differences in electrical appliances purchase decision-making process based on socioeconomic context-headship, family composition, ethnicity, and location as objective …	2020-09	2023-04-16 08:40:53	2023-04-16 08:40:53	1049-1062	5	28	Sustain. Dev.	Place: Hoboken Publisher: Wiley WOS:000562568000001	sustainability; women; men; behavior; gender differences; decision-making; dont; electrical appliances purchase; energy-saving
K844P58Y	journalArticle	2018	Calabrese, Armando; Costa, Roberta; Ghiron, Nathan Levialdi; Menichini, Tamara	Gender Equality Among CSR Managers and its Influence on Sustainable Development: A Comparison Among Italy, Spain and United Kingdom	European Journal of Sustainable Development	2239-5938	10.14207/ejsd.2018.v7n4p451	The Sustainable Development Goals (SDGs) of the United Nations' 2030 Agenda for Sustainable Development are intended to orientate efforts of governments and companies to deal with environmental and social problems affecting contemporary societies. Gender Equality is one of these SDGs, and the women's participation in leadership at all levels of decision making in political, economic and public li…	2018	2023-04-16 08:40:53	2023-04-16 08:40:53	451-462	4	7	Eur. J. Sustain. Dev.	Place: Rome Publisher: European Center Sustainable Development WOS:000446113700043	Sustainable Development; Sustainability; impact; corporate social-responsibility; diversity; firm performance; Gender equality; board; Corporate Social Responsibility (CSR) Manager; Female leadership; Sustainable Development Goals (SDGs)
PTD8Z4MX	journalArticle	2022	van Wyk, Tanya	Stuck between Mother Earth and a mother's womb? On women, population policy and ecological sustainable development	Hts Teologiese Studies-Theological Studies	0259-9422	10.4102/hts.v78i4.7792	This article considers how the metaphor of Mother Earth, for women, concerns a dual stance of both belonging and distance. The link between women, nature and Mother Earth is problematised by considering the possible, or contested, link between population growth and climate change, and the South African population policy specifically is considered as an example. Ecofeminism's challenge to the perc…	2022-09-14	2023-04-16 08:40:53	2023-04-16 08:56:47	a7792	4	78	HTS Teol. Stud.-Theol. Stud.	Place: Durbanville Publisher: Aosis WOS:000875686400001	sustainable development; South Africa; environment; climate; women; population; nature; Mother Earth; motherhood; mothering; theology
34W6BKPJ	journalArticle	2021	Di Lonardo, Sara; Cinocca, Andrea	A Man and the Biosphere Reserve as a natural and socio-economic laboratory for the sustainable future of small rural communities	Eco Mont-Journal on Protected Mountain Areas Research	2073-106X	10.1553/eco.mont-13-sis125	The UNESCO Man and the Biosphere Reserve Collemeluccio-Montedimezzo-Alto Molise was established in 1977 in Molise Region (Central Italy) to safeguard local natural and managed ecosystems in two separate areas administered by two different municipalities. An association of seven small municipalities with various local bodies, the ASSOMAB Alto Molise Consortium, was established in 2006 to expand an…	2021-11	2023-04-16 08:40:53	2023-04-16 08:40:53	125-129		13	Eco Mont	Place: Vienna Publisher: Austrian Acad Sciences Press, Univ Innsbruck WOS:000722924900006	innovation; management; unesco; Collemeluccio-Montedimezzo-Alto Molise; MAB Programme
BQEAY3K5	journalArticle	2020	Montero, Carla Guerron	Women Sustaining Community: The Politics of Agro-Ecology in Quilombo Tourism in Southern Brazil	Bulletin of Latin American Research	0261-3050	10.1111/blar.12884	This article analyses how a gendered perspective on community-based tourism (CBT) contributes to the realisation of identity and sovereignty of quilombos. It examines the potential sustainability of CBT coupled with agro-ecological practices within the context of gendered identity politics. Drawing from in-depth ethnographic and archival research conducted between February and July 2015 at Campin…	2020-04	2023-04-16 08:40:53	2023-04-16 08:40:53	191-207	2	39	Bull. Lat. Am. Res.	Place: Hoboken Publisher: Wiley WOS:000526089300007	gender; revolution; agro-ecology; Brazil; community-based tourism; cultural tourism; ethnic identity; latin-america; Quilombos
MUZGPPCL	journalArticle	2010	Meklach, Yassin; Sanchez Alhama, Jose; Molero Mesa, Joaquin; El Ouahrani, Abdeltif; Merzouki, Abderrahman	CANNABIS AND SUSTAINABLE DEVELOPMENT IN GHOMARA'S MOUNTAINS (WESTERN COASTAL PART OF RIF - NORTH OF MOROCCO): THE GENDER MAKES THE DIFFERENCE?	M+a-Revista Electronica De Medio Ambiente	1886-3329		The Ghomarian woman plays fundamental role in her society: the ruling agricultural activity as well as the sociocultural life depends strictly on her, but this woman still suffers some discrimination. To clear up this situation, a study concerning about 249 peoples was realized through the adoption of a quantitative and qualitative sociological approach. According to the obtained results, the wom…	2010	2023-04-16 08:40:53	2023-04-16 08:40:53	1-14		9	M A-Rev. Electron. Med. Ambiente	Place: Madrid Publisher: Univ Complutense Madrid, Servicio Publicaciones WOS:000216115200001	Gender; sustainable development; cannabis cultivation; Ghomara; Morocco; qualitative analysis; Rif
UTL2KL52	journalArticle	1993	HESSING, M.	WOMEN AND SUSTAINABILITY - ECOFEMINIST PERSPECTIVES	Alternatives-Perspectives on Society Technology and Environment	0002-6638			1993-09	2023-04-16 08:40:53	2023-04-16 08:40:53	14-21	4	19	Altern.-Perspect. Soc. Technol. Environ.	Place: Waterloo Publisher: Alternatives WOS:A1993LP67600010
9I5IACRT	journalArticle	2022	Wondimu, Habtamu; Delelegn, Wubit; Dejene, Kassahun	What do female-headed households' livelihood strategies in Jimma city, South west Ethiopia look like from the perspective of the sustainable livelihood approach?	Cogent Social Sciences	2331-1886	10.1080/23311886.2022.2075133	Female-headed households have now become highly prevalent across the world. Much research in low-income urban populations has identified female household heads as more vulnerable and less secure livelihoods than male households. The study's main goal was to investigate the livelihoods of female-headed families in Jimma town, southwestern Ethiopia, using a sustainable livelihoods approach (SLA), w…	2022-12-31	2023-04-16 08:40:53	2023-04-16 08:40:53	2075133	1	8	Cogent Soc. Sci.	Place: Oslo Publisher: Taylor & Francis As WOS:000796736600001	sustainability; vulnerability; assets; livelihoods; Female-headed; households
3M9MEMQ3	journalArticle	2021	Haggar, Jeremy; Rodenburg, Jonne	Lessons on enabling African smallholder farmers, especially women and youth, to benefit from sustainable agricultural intensification	International Journal of Agricultural Sustainability	1473-5903	10.1080/14735903.2021.1898179	The papers in this Special Issue on what works and what is unlikely to work to enable poorer smallholders, especially women and youth, to benefit from Sustainable Agricultural Intensification (SAI) come from the Sustainable Agricultural Intensification Research and Learning programme. Three aspects of SAI are considered: (i) the equity of outcomes from SAI and how decisions to support equity can …	2021-11-02	2023-04-16 08:40:53	2023-04-16 08:40:53	636-640	5-6	19	Int. J. Agric. Sustain.	Place: Abingdon Publisher: Taylor & Francis Ltd WOS:000641346400001	Equity; services; trade-offs; extension services; tools
HXXAPUSP	journalArticle	2023	Presta-Novello, Deborah; Salazar-Camacho, Natalia Andrea; Delgadillo-Mirquez, Liliana; Hernandez-Sarabia, Hector Mauricio; Alvarez-Bustos, Monica del Pilar	Sustainable Development in the Colombian Post-Conflict-The Impact of Renewable Energies in Coffee-Growing Women	Sustainability		10.3390/su15021618	Coffee is one of the most representative agricultural products in Colombia; several factors related to how it is produced, processed and marketed make it particularly important in post-conflict situations. The cultivation of coffee has acquired a very important role in the post-conflict stage that Colombia is experiencing. The rural areas hit hardest by violence are now seeing how improving agric…	2023-01	2023-04-16 08:40:53	2023-04-16 08:40:53	1618	2	15	Sustainability	Place: Basel Publisher: Mdpi WOS:000932315700001	sustainable development; renewable energy; anaerobic co-digestion; biogas; coffee-growing women; fermentation; post-conflict; waste-water
H6ZDIMDB	journalArticle	2021	Akurugu, Constance Awinpoka; Jatoe, Mathias Mwinlabagna; Domapielle, Maximillian Kolbe	Empowering rural women for sustainable development through the provision of water infrastructure in north-western Ghana	World Development Perspectives	2452-2929	10.1016/j.wdp.2021.100287	This article examines the role of the 'Water for Resilience' intervention in empowering poor women for sustainable development in the semi-arid and deprived settings of rural north-western Ghana. The Water for Resilience project aimed at equipping poor women, with enhanced income-generating opportunities to overcome poverty and to enhance resilience. This was done by drawing on agro-ecological me…	2021-03	2023-04-16 08:40:53	2023-04-16 08:40:53	100287		21	World Dev. Perspect.	Place: Amsterdam Publisher: Elsevier WOS:000693688800006	female; gender; power; Food security; Northern Ghana; Resilience; state; Strategic gender interests; Vulnerability; Women's empowerment
XLWHNQEL	journalArticle	2021	Poleacovschi, Cristina; Faust, Kasey; Roy, Arkajyoti; Feinstein, Scott	Identity of Engineering Expertise: Implicitly Biased and Sustaining the Gender Gap	Journal of Civil Engineering Education	2643-9107	10.1061/(ASCE)EI.2643-9115.0000027	Experts bring necessary comprehensive and authoritative knowledge to address issues as they arise throughout a project. This expertise is critical for construction and engineering organizations because the characteristics of each project are dynamic and unique. Practitioners often perceive expertise as objective across demographics; however, this study demonstrates that it is subjective, and that…	2021-01	2023-04-16 08:40:53	2023-04-16 08:40:53	4020011	1	147	J. Civ. Eng. Educ.	Place: Reston Publisher: Asce-Amer Soc Civil Engineers WOS:000595184400004	construction; women; diversity; prejudice; role congruity
DQYAD2FK	journalArticle	2017	DeMotts, Rachel B.	Weaving a living: gender, craft, and sustainable resource use in Botswana	Journal of Political Ecology	1073-0451	10.2458/v24i1.20878	Botswana baskets are both an emblematic cultural symbol and a popular tourist souvenir, made by women from natural materials and reflecting gendered experiences of work, creativity, and resource use. The expansion of their production for sale over the past 30 years has often led to concerns about strain on the natural resources used for weaving, but more recently, the ways in which women talk abo…	2017	2023-04-16 08:40:53	2023-04-16 08:40:53	368-385		24	J. Polit. Ecol.	Place: Tucson Publisher: Univ Arizona Libraries WOS:000400392200024	Gender; management; womens empowerment; political ecology; Botswana; community-based conservation; craft; institutions; namibia; northern botswana; okavango delta; participatory conservation; southern africa
BKHNYJ3Y	journalArticle	2019	Soto Alarcon, Jozelin Maria; Sato, Chizu	Enacting peasant moral community economies for sustainable livelihoods: A case of women-led cooperatives in rural Mexico	World Development	0305-750X	10.1016/j.worlddev.2018.11.005	The Mexican state has promoted women's group-based income-generating projects for nearly three decades. Although most state-supported income-generating projects discontinue after external funding ends, some continue to operate. While existing studies have highlighted several reasons for dis-/continuation, none have focused on the role of moral obligations in shaping women's everyday livelihood pr…	2019-03	2023-04-16 08:40:53	2023-04-16 08:40:53	120-131		115	World Dev.	Place: Oxford Publisher: Pergamon-Elsevier Science Ltd WOS:000456352700009	Gender; empowerment; gender; poverty; Mexico; participation; strategies; autonomy; chiapas; Community economies; Cooperatives; Household moral economy; Peasant moral economy; projects; third-world
TUCJQ4CL	journalArticle	2021	Pohlmann, Attila	No man is an island: The sustainability awareness effect of geography on hedonic fashion consumption and connection with nature - evidence from Galapagos and HawaiModified Letter Turned Commai	Critical Studies in Mens Fashion	2050-070X	10.1386/csmf_00041_1	The demand for ever-accelerating fast fashion is unprecedented, while its supply chain burdens environmental systems. Hedonic fashion consumption is generally unfettered by sustainability concerns, but evidence suggests that island geogra-phies-with dense boundaries between the built and the natural environment-have a heightening effect on eco-consciousness. A framework based on the contemporary …	2021-10-01	2023-04-16 08:40:53	2023-04-16 08:40:53	205-221	1-2	8	Crit. Stud. Mens Fash.	Place: Bristol Publisher: Intellect Ltd WOS:000732811200015	sustainability; tourism; green; fashion consumption; hyperconsumption; connection with nature; ecosystem; hedonic consumption; island geography; visual study
FTMV6KTR	journalArticle	2017	Theriault, Veronique; Smale, Melinda; Haider, Hamza	How Does Gender Affect Sustainable Intensification of Cereal Production in the West African Sahel? Evidence from Burkina Faso	World Development	0305-750X	10.1016/j.worlddev.2016.12.003	Better understanding of gender differences in the adoption of agricultural intensification strategies is crucial for designing effective policies to close the gender gap while sustainably enhancing farm productivity. We examine gender differences in adoption rates, likelihood and determinants of adopting strategy sets that enhance yields, protect crops, and restore soils in the West African Sahel…	2017-04	2023-04-16 08:40:53	2023-04-16 08:40:53	177-191		92	World Dev.	Place: Oxford Publisher: Pergamon-Elsevier Science Ltd WOS:000393247600013	adoption; gender; women; extension; farmers; soil fertility management; agricultural innovations; Burkina Faso; cereals; diversification; eastern; intensification; norms; technologies; West Africa
2BE88SVY	journalArticle	2019	Pilgeram, Ryanne	"How Much Does Property Cost Up There?": Exploring the Relationship between Women, Sustainable Farming, and Rural Gentrification in the US	Society & Natural Resources	0894-1920	10.1080/08941920.2018.1530818	Using in-depth interviews with women engaged in sustainable farming in the western United States, this project explores an unanticipated finding: migration from an urban area to rural Prairie County was necessary for these farmers to secure farm land and sustain their farming operations. This article interrogates the role of migration in women's access to farmland as both an economic and cultural…	2019-08-03	2023-04-16 08:40:53	2023-04-16 08:40:53	911-927	8	32	Soc. Nat. Resour.	Place: Philadelphia Publisher: Taylor & Francis Inc WOS:000468818800004	Gender; agriculture; farmers; identity; rural sociology; sociology of agriculture and food organic agriculture
3UUN9G5K	journalArticle	2016	Lewis, Nancy D.	Sustainable development through a gendered lens: climate change adaptation and disaster risk reduction	Reviews on Environmental Health	0048-7554	10.1515/reveh-2015-0077	The UN General Assembly has just adopted the post 2015 Sustainable Development Agenda articulated in the 17 Sustainable Development Goals (SDGs). Achieving the SDGs will be furthered by the closer integration of the climate change adaptation (CCA) and disaster risk reduction (DRR) agendas. Gender provides us a valuable portal for considering this integration. Acknowledging that gender relaters to…	2016-03	2023-04-16 08:40:53	2023-04-16 08:40:53	97-102	1	31	Rev. Environ. Health	Place: Berlin Publisher: Walter De Gruyter Gmbh WOS:000372290300022
6DZ2LZDN	journalArticle	1997	Hassanein, N.	Networking knowledge in the sustainable agriculture movement: Some implications of the gender dimension	Society & Natural Resources	0894-1920	10.1080/08941929709381024	Knowledge issues are a critical dimension in the politics of the sustainable agriculture movement. Recent research has examined how sustainable farming networks facilitate the creation and exchange of local knowledge about alternative practices and ideas. This article extends those analyses by exploring the role of social location in that knowledge creation and exchange process, based oil field r…	1997-06	2023-04-16 08:40:53	2023-04-16 08:40:53	251-257	3	10	Soc. Nat. Resour.	Place: Bristol Publisher: Taylor & Francis WOS:A1997XD51900003	women in agriculture; science; alternative agriculture; farmer; local knowledge; sustainable agriculture movement; sustainable farming networks
LNWCJN8X	journalArticle	2019	Osunmuyiwa, Olufolahan; Ahlborg, Helene	Inclusiveness by design? Reviewing sustainable electricity access and entrepreneurship from a gender perspective	Energy Research & Social Science	2214-6296	10.1016/j.erss.2019.03.010	There is a substantial literature analysing the role of electricity as a catalyst for economic development. However, there are significant knowledge gaps in whether such systems are or can indeed be designed in a gender sensitive way to promote equal opportunity for socially inclusive entrepreneurship at the local level. We make three main contributions with this paper. First, we carry out a lite…	2019-07	2023-04-16 08:40:53	2023-04-16 08:40:53	145-158		53	Energy Res. Soc. Sci.	Place: Amsterdam Publisher: Elsevier WOS:000471282400015	culture; impact; framework; womens empowerment; finance; systems; Women's empowerment; discourse; Electricity access; embeddedness; energy poverty; Gender and energy; Gender and entrepreneurship; rural electrification
8I4FYDZP	journalArticle	2013	Sastre-Merino, Susana; Negrillo, Xavier; Hernandez-Castellano, Daniel	Sustainability of Rural Development Projects within the Working With People Model: Application to Aymara Women Communities in the Puno Region, Peru	Cuadernos De Desarrollo Rural	0122-1450		Development projects have changed from a technical and top-down vision to an integrated view pursuing economic, social and environmental sustainability. In this context, planning and management models with bottom-up approaches arise, as the Working With People (WWP) model, that emphasizes on the participation and social learning, also incorporating a holistic approach stemming from its three type…	2013	2023-04-16 08:40:53	2023-04-16 08:40:53	219-244	70	10	Cuad. Desarro. Rural	Place: Bogota Publisher: Pontificia Univ Javeriana, Fac Educ WOS:000328552800010	sustainable development; competences; Aymara Indians; Aymara communities; contests; development projects; rural development projects; rural development methodology; rural planning; Social learning; Socialization; Working With People
QW757SJV	journalArticle	2022	Begum, Flora; Bruyn, Lisa Lobry de; Kristiansen, Paul; Islam, Mohammad Amirul	Forest co-management in the Sundarban mangrove forest: Impacts of women's participation on their livelihoods and sustainable forest resource conservation	Environmental Development	2211-4645	10.1016/j.envdev.2022.100731	The impacts of women's participation in forest resource management on forest conservation and women's livelihoods are poorly understood. This study investigated women's role in Sundarban mangrove forest co-management in order to identify these impacts. Qualitative data was collected through focus group discussions (FGDs, n = 16) and key informant interviews (KIIs, n = 29) in four villages, at dif…	2022-09	2023-04-16 08:40:53	2023-04-16 08:40:53	100731		43	Environ. Dev.	Place: Amsterdam Publisher: Elsevier WOS:000808449900002	Gender; empowerment; gender; community; management; governance; perceptions; attitudes; framework; Alternative income; Awareness; Decision-making capacity; Engagement; Harvesting forest resources; income inequality; marine protected areas
QPRF5ZWC	journalArticle	2021	Tsai, Liang-Ting; Chang, Cheng-Chieh; Hu, Pei-Hsi	A scale for assessing student understandings of marine resource conservation and sustainability: psychometric verification and the latent mean difference between genders	Environmental Education Research	1350-4622	10.1080/13504622.2021.1923664	This study developed a scale for evaluating how well students understand marine-resource conservation and sustainability; it evaluated the scale's psychometric properties and investigated the gender difference in the scale's score. We recruited 929 university students in Taiwan to answer a questionnaire developed using the scale. The scale's reliability and validity were indicated through psychom…	2021-08-17	2023-04-16 08:40:53	2023-04-16 08:40:53	1329-1342	9	27	Environ. Educ. Res.	Place: Abingdon Publisher: Routledge Journals, Taylor & Francis Ltd WOS:000657575000001	knowledge; environment; attitudes; latent mean comparison; marine education; Marine resource conservation; marine sustainability; measurement invariance; psychometric property; school-students; taiwan; version
A7ADYEWV	journalArticle	2020	Burns, Paul A.; Zunt, Joseph R.; Hernandez, Bernardo; Wagenaar, Bradley H.; Kumar, Manasi; Omolo, Danvers; Breinbauer, Cecilia	Intimate Partner Violence, Poverty, and Maternal Health Care-Seeking Among Young Women in Kenya: a Cross-Sectional Analysis Informing the New Sustainable Development Goals	Global Social Welfare	2196-8799	10.1007/s40609-017-0106-4	Background Despite considerable achievements associated with the MDGs, under-five mortality, particularly in sub-Saharan Africa, remains alarmingly high. Globally, intimate partner violence (IPV) affects one in three women within their lifetime. Little is known about the relationship between IPV and maternal care-seeking in the context of high rates of under-five mortality, particularly among you…	2020-03	2023-04-16 08:40:53	2023-04-16 08:40:53	1-13	1	7	Glob. Soc. Welfare	Place: Cham Publisher: Springer International Publishing Ag WOS:000511957300001	prevalence; domestic violence; Antenatal care; Gender inequality; Intimate partner violence; Maternal care-seeking behavior; multicountry; pregnancy; Preventable childhood diseases; states; Under-five mortality
EWIAND8D	journalArticle	2022	de Miguel Gonzalez, Rafael; Sebastian-Lopez, Maria	Education on Sustainable Development Goals: Geographical Perspectives for Gender Equality in Sustainable Cities and Communities	Sustainability		10.3390/su14074042	Because of its interdisciplinary approach as a social science directly related to the natural sciences, geography is the academic discipline and school subject that equips students well with knowledge, skills, and values related to education on sustainable development goals. This study is part of the results of MyGEO, a project funded by the European Commission, and it is based on a collaborative…	2022-04	2023-04-16 08:40:53	2023-04-16 08:40:53	4042	7	14	Sustainability	Place: Basel Publisher: Mdpi WOS:000780789300001	sustainable development; education; gender empowerment; sustainable cities
X4Q76UZD	journalArticle	2021	Fischer, Gundula; Darkwah, Akosua; Kamoto, Judith; Kampanje-Phiri, Jessica; Grabowski, Philip; Djenontin, Ida	Sustainable agricultural intensification and gender-biased land tenure systems: an exploration and conceptualization of interactions	International Journal of Agricultural Sustainability	1473-5903	10.1080/14735903.2020.1791425	How does sustainable agricultural intensification's (SAI) tenet of increased productivity on the same area of land relate to prevailing gender-biased land tenure systems? How can one conceptualize the interactions between intensified land use and control over land, labour, crops and benefits - and how can equitable outcomes be facilitated? These questions (which have not yet received sufficient a…	2021-11-02	2023-04-16 08:40:53	2023-04-16 08:40:53	403-422	5-6	19	Int. J. Agric. Sustain.	Place: Abingdon Publisher: Taylor & Francis Ltd WOS:000550082400001	Gender; Malawi; livelihoods; framework; Ghana; technology; rights; africa; land; sustainable agricultural intensification
ELMERGJT	journalArticle	2021	Hossen, M. Anwar; Benson, David; Hossain, Syeda Zakia; Sultana, Zakia; Rahman, Md Mizanur	Gendered Perspectives on Climate Change Adaptation: A Quest for Social Sustainability in Badlagaree Village, Bangladesh	Water		10.3390/w13141922	Climate change effects cause major socioeconomic challenges for marginalized groups, particularly women, in Bangladesh. Specifically, drought increases resource scarcity, causing social problems that impact women, which can be described as the gendered sociocultural construction of vulnerabilities. Given this constructed dimension of gender-based vulnerability, this paper explores the effects of …	2021-07	2023-04-16 08:40:53	2023-04-16 08:40:53	1922	14	13	Water	Place: Basel Publisher: Mdpi WOS:000677074800001	sustainability; gender; vulnerability; climate change; adaptation; social development; future; communities; place; collaborative governance; drought; level adaptation; social vulnerability; violence against women
E6MVF77Y	journalArticle	1996	Cornman, J. C.	Toward sustainable development: Implications for population aging and the wellbeing of elderly women in developing countries	Population and Environment	0199-0039	10.1007/BF02208412	Attaining sustainable development has significant implications for population age structure, family structure and the wellbeing of elderly women. If one of the primary goals of sustainable development is reducing fertility to attain a population growth rate which can be supported by the Earth's resources, then working toward sustainable development will lead to an aging population. This demograph…	1996-11	2023-04-16 08:40:53	2023-04-16 08:40:53	201-217	2	18	Popul. Env.	Place: New York Publisher: Human Sci Press Inc WOS:A1996VN52200008	korea
DV82BCLV	journalArticle	2021	Grabowski, Philip P.; Djenontin, Ida; Zulu, Leo; Kamoto, Judith; Kampanje-Phiri, Jessica; Darkwah, Akosua; Egyir, Irene; Fischer, Gundula	Gender- and youth-sensitive data collection tools to support decision making for inclusive sustainable agricultural intensification	International Journal of Agricultural Sustainability	1473-5903	10.1080/14735903.2020.1817656	To achieve equitable sustainable agricultural intensification (SAI), it is essential to understand differential access and control over agricultural resources by women and youth, and to assess how intensification interacts with gendered and age-dependent relationships. Existing packages for assessing women's empowerment in agriculture tend to be large-scale surveys that do not provide timely resu…	2021-11-02	2023-04-16 08:40:53	2023-04-16 08:40:53	359-375	5-6	19	Int. J. Agric. Sustain.	Place: Abingdon Publisher: Taylor & Francis Ltd WOS:000571113700001	africa; Gender equity; ghana; participatory tools; sustainable intensification
SPTKQ975	journalArticle		Amin, Ali; Ali, Rizwan; Rehman, Ramiz Ur; Elamer, Ahmed A.	Gender diversity in the board room and sustainable growth rate: the moderating role of family ownership	Journal of Sustainable Finance & Investment	2043-0795	10.1080/20430795.2022.2138695	This study examines the impact of gender diversity on sustainability growth, and moderating role of family ownership in an emerging economy, Pakistan. We employed 3730 firm-year observations, comprising of 307 non-financial firms listed on Pakistan Stock Exchange, over a period 2008-2020. Using framework of agency theory, resource dependence theory and social identity theory, we report that gende…		2023-04-16 08:40:53	2023-04-16 08:40:53				J. Sustain. Financ. Invest.	Place: Abingdon Publisher: Routledge Journals, Taylor & Francis Ltd WOS:000876148400001	Gender diversity; independence; impact; corporate social-responsibility; firm performance; governance; behavior; policy; environmental performance; women directors; agency theory; family ownership; resource dependence theory; sustainable growth; top management
IT4EJ9DP	journalArticle	2014	Siulemba, Geofrey K.; Moodley, Vadivelu	A gendered analysis of sustainable agricultural practices with changing climate in the Chankumba agricultural community, Zambia	Agenda-Empowering Women for Gender Equity	1013-0950	10.1080/10130950.2014.932126	Low agricultural productivity in Zambia is the result of long-term unsustainable practices amongst small-scale farmers. This situation has been compounded by the effects of climate change. Climate change has contributed to frequent droughts and increased floods in sub-Saharan Africa which is regarded as the most vulnerable region in the world. These natural disasters coupled with factors such as …	2014	2023-04-16 08:40:53	2023-04-16 08:40:53	135-146	3	28	Agenda-Empower. Women Gend. Equity	Place: Abingdon Publisher: Routledge Journals, Taylor & Francis Ltd WOS:000420294200013	climate change; natural disasters; gendered analysis; small-scale farmers; sustainable agricultural practices
EE6TEY2A	journalArticle	2013	Yasmin, Tahira; Khattak, Roshanzada; Ngah, Ibrahim	Facilitating Earthquake-Affected Rural Women Communities Toward Sustainable Livelihoods and Agriculture	Agroecology and Sustainable Food Systems	2168-3565	10.1080/21683565.2012.762637	Women open school participatory learning approach was used to build up the capacity of 1055 rural women of selected earthquake-affected areas of Balakot, district Mansehra, Khyber Pukhtunkhwa province of Pakistan in kitchen gardening and off-season vegetable cultivation, integrated pest management, pesticide risk reduction, poultry and livestock management, health and hygiene, and income-generati…	2013-05-01	2023-04-16 08:40:53	2023-04-16 08:40:53	592-613	5	37	Agroecol. Sustain. Food Syst.	Place: Philadelphia Publisher: Taylor & Francis Inc WOS:000324654600006	Pakistan; impact; rural women; capacity development; kitchen gardening; livelihood revival; pesticide risk reduction; women open school
VU66CP9B	journalArticle	2022	Saigal, Taru; Vaish, Arun Kr; Rao, N. V. M.	Socio-economic- and Gender-based Differentials in Choice of Sustainable Mode o Transport: Evidence from Jaipur, India	Millennial Asia	0976-3996	10.1177/0976399621993432	Climate change, fuelled by the growing transportation sector, is a pressing global challenge. There is a need to promote such a system of transportation, which is not only efficient but also sustainable. Using descriptive statistics complemented with a logit model of choice probabilities implemented on survey data from a city in a developing country, this study aims to examine the impact 'of diff…	2022-08	2023-04-16 08:40:53	2023-04-16 08:40:53	317-338	2	13	Millenn. Asia	Place: Thousand Oaks Publisher: Sage Publications Inc WOS:000630803600001	gender; travel behavior; income; developing country; Sustainability; women; urban; consumption; public transport; households; england; fuel; logit model; mode of transport; patterns; socio-economic factors
D26A7BID	journalArticle	2020	Chiblow, Susan	An Indigenous Research Methodology That Employs Anishinaabek Elders, Language Speakers and Women's Knowledge for Sustainable Water Governance	Water		10.3390/w12113058	Indigenous research paradigms are congruent to Indigenous worldviews and have become more dominant in areas such as Indigenous policy and education. As Indigenous research paradigms continue to gain momentum, the historical legacy of unethical research is addressed as more Indigenous communities and organizations develop their own research protocols. There is a plethora of articles explaining Ind…	2020-11	2023-04-16 08:40:53	2023-04-16 08:40:53	3058	11	12	Water	Place: Basel Publisher: Mdpi WOS:000594960900001	responsibility; colonialization; relationality; respect; worldview
H5CHZEQP	journalArticle		Prokop, Viktor; Hojnik, Jana; Zapletal, David; Zizmond, Egon	On the path to sustainable development: The nexus among owner gender diversity, energy management, and firms' innovation radicalness	Business Strategy and the Environment	0964-4733	10.1002/bse.3220	This research focuses on the part of sustainable development related to energy management and thus aims to find the missing piece in research on the role of owner gender diversity (OGD) in processes of energy management (EM) introduction and the creation of radical and incremental innovation. Employing the World Bank's Enterprise Survey 2019 data covering 4646 firms from 11 European countries, we…		2023-04-16 08:40:53	2023-04-16 08:40:53				Bus. Strateg. Environ.	Place: Hoboken Publisher: Wiley WOS:000839668900001	motivation; sustainable development; impact; directors; performance; efficiency; board gender; eco-innovation; energy management; European countries; incremental innovation; moderating role; owner gender diversity; product innovation; radical innovation; research-and-development; World Bank's Enterprise Survey
5CMQV54R	journalArticle	2015	Ghanbari, Yousef	PARTICIPATION OF RURAL WOMEN IN THE AGRICULTURAL SECTOR AND ITS IMPACT ON THE SUSTAINABLE DEVELOPMENT OF THE VILLAGE (CASE STUDY OF RURAL WOMEN IN BARZOK AREA OF KASHAN)	Scientific Papers-Series E-Land Reclamation Earth Observation & Surveying Environmental Engineering	2285-6064		The main objective of this study is to investigate the impact of economic activities of the rural women on the sustainable development, and to identify the influential factors (individual, family, organization) on the rate of their participation in the agricultural activities in Barzok area of Kashan. The research method was descriptive - analytic, and the required information was collected based…	2015	2023-04-16 08:40:53	2023-04-16 08:40:53	35-40		4	Sci. Pap.-Ser. E-Land Reclam. Earth Obs. Surv. Environ. Eng.	Place: Bucharest Publisher: Univ Agricultural Sciences & Veterinary Medicine Bucharest WOS:000416377000007	agricultural sector; farmer women; rural economy of Barzok area; women's participation
VAM9TYVP	journalArticle	2021	Yiridomoh, Gordon Yenglier; Bebelleh, Frederick Der; Bonye, Samuel Ziem; Dayour, Frederick	Women in ginger production and livelihood sustainability in rural Ghana: an explorative study	Local Environment	1354-9839	10.1080/13549839.2021.1952967	Sustainable development and sustainability have taken centre stage in national and international discussions in recent years. Empirical evidence suggests that sustainability of development endeavours and livelihood are crucial for sustainable development. In Ghana, studies have found the role of food crop production in livelihood sustainability of farmers. Ginger farming is one crop that is not f…	2021-09-02	2023-04-16 08:40:53	2023-04-16 08:40:53	1051-1069	9	26	Local Environ.	Place: Abingdon Publisher: Routledge Journals, Taylor & Francis Ltd WOS:000674792500001	sustainable development; Women; ginger production; livelihood sustainability; sustainable livelihood
NASLK5TX	journalArticle	2022	Dabara, Daniel Ibrahim; Chiwuzie, Augustina	Female-Led agrarian households and the question of sustainable land and food security in an emerging economy: Evidence from Tula Baule	Habitat International	0197-3975	10.1016/j.habitatint.2022.102512	Purpose: This study examines the nexus between land tenure security (LTS) and food security (FS) in female-led households of Tula Baule agrarian settlements. Design: /Methodology/ApproachThe study used a qualitative research design based on the constructivist paradigm. The researchers conducted in-depth interviews with female household heads cutting across the three "yaati" (villages) of Tula Bau…	2022-02	2023-04-16 08:40:53	2023-04-16 08:40:53	102512		120	Habitat Int.	Place: Oxford Publisher: Pergamon-Elsevier Science Ltd WOS:000750954900005	gender; insecurity; Access to land; Female-led household; Food sustainability; Gender equality; Land tenure; tenure security; Tula Baule
6RD2YU7L	journalArticle	2021	Israel Contreras-Medina, David; Ernesto Medina-Cuellar, Sergio; Sanchez-Gomez, Julia; Mario Rodriguez-Peralta, Carlos	Innovation of Women Farmers: A Technological Proposal for Mezcalilleras' Sustainability in Mexico, Based on Knowledge Management	Sustainability		10.3390/su132111706	Currently, technology usage is a fundamental asset for creating, developing, and implementing innovations; however, these are not available to everyone, which is accentuated in women with agricultural occupations. The present study develops a proposal of technologies for mezcalilleras' sustainability from Oaxaca, Mexico, based on a knowledge management methodology, through the application of ques…	2021-11	2023-04-16 08:40:53	2023-04-16 08:40:53	11706	21	13	Sustainability	Place: Basel Publisher: Mdpi WOS:000723132400001	technologies; agave-mezcal activity; creation; digital divide; mezcalilleras; SECI knowledge management model
AX4GFFWM	journalArticle	2021	Imburgia, Laura; Osbahr, Henny; Cardey, Sarah; Momsen, Janet	Inclusive participation, self-governance, and sustainability: Current challenges and opportunities for women in leadership of communal irrigation systems	Environment and Planning E-Nature and Space	2514-8486	10.1177/2514848620934717	Genuine inclusive participation in the self-governance of communal irrigation systems remains a challenge. This article analyses the mechanisms of participation in irrigation water users' associations (WUAs) with focus on women as leaders of those organizations by drawing on cases from a comparative, multicase mixed-method study in Ethiopia and Argentina. After having being a topic for decades in…	2021-09	2023-04-16 08:40:53	2023-04-16 08:40:53	886-914	3	4	Environ. Plan. E-Nat. Space	Place: Thousand Oaks Publisher: Sage Publications Inc WOS:000755972300012	gender; management; ethiopia; access; agricultural irrigation; areas; associations; Inclusive participation; intersections; reflections; resources; social rootedness; water governance; water users' associations; women's leadership
HSPKIT72	journalArticle	2016	de Marco Larrauri, Olga; Perez Neira, David; Soler Montiel, Marta	Indicators for the Analysis of Peasant Women's Equity and Empowerment Situations in a Sustainability Framework: A Case Study of Cacao Production in Ecuador	Sustainability		10.3390/su8121231	Family agriculture is a fundamental pillar in the construction of agroecological agri-food alternatives fostering processes of sustainable rural development where social equity represents a central aspect. Despite agroecology's critical openness, this area has not yet incorporated an explicit gender approach allowing an appropriate problematization and analysis of the cultural inequalities of gen…	2016-12	2023-04-16 08:40:53	2023-04-16 08:40:53	1231	12	8	Sustainability	Place: Basel Publisher: Mdpi WOS:000389317100022	sustainability; empowerment; gender; feminism; equity; agroecology; communities; food sovereignty; reflections; gender indicators
